# Supplementary material
Source: publisher site journal article supplement (https://www.spandidos-publications.com/3582/downloadSupplementary)
Supplement: Supplementary file 1 [file downloadSupplementary]

## Sheet: Sheet2
Table SII. Raw dataset of the entire primary cohort comprising 1,471 patients with non-metastatic Ewing sarcoma.
Age at diagnosis, years	Race recode (White, Black, Other)	Sex	Primary Site - labeled	Grade	Diagnostic confirmation	ICD-O-3 Hist/behav, malignant	Derived AJCC T, 6th ed (2004+)	Derived AJCC N, 6th ed (2004+)	Derived AJCC M, 6th ed (2004+)	RX Summ--Surg Oth Reg/Dis (2003+)	Reason no cancer-directed surgery	Radiation sequence with surgery	Radiation recode	Chemotherapy recode (yes, no/unk)	CS tumor size (2004+)	CS extension (2004+)	CS lymph nodes (2004+)	CS mets at dx (2004+)	SEER historic stage A	Marital status at diagnosis	% <9th grade education 2000	% <High school education 2000	% At least bachelors degree 2000	Median family income (in tens) 2000	% Families below poverty 2000	% Unemployed 2000	% White collar 2000	Survival, months	Vital status recode (study cut-off used)	Type of follow-up expected	SEER cause-specific death classification	SEER other cause of death classification
49	White	Female	C41.3-Rib, sternum, clavicle and associated joints	Poorly differentiated; Grade III	Positive histology	9260/3: Ewing sarcoma	T1	N0	M0	None; diagnosed at autopsy	Surgery performed	Radiation after surgery	Beam radiation	Yes	35	400	0	0	Regional	Single (never married)	718	1472	3901	8074	345	326	4352	81	Alive	Active follow-up	N/A not first tumor	N/A not first tumor
16	White	Female	C41.2-Vertebral column	Unknown	Positive histology	9260/3: Ewing sarcoma	T1	N0	M0	None; diagnosed at autopsy	Not recommended	No radiation and/or cancer-directed surgery	Beam radiation	Yes	45	400	0	0	Regional	Single (never married)	718	1472	3901	8074	345	326	4352	88	Dead	Active follow-up	Dead (attributable to this cancer dx)	Alive or dead due to cancer
11	Other (American Indian/AK Native, Asian/Pacific Islander)	Male	C41.4-Pelvic bones, sacrum, coccyx and associated joints	Unknown	Positive histology	9260/3: Ewing sarcoma	T2	N0	M0	None; diagnosed at autopsy	Not recommended	No radiation and/or cancer-directed surgery	Beam radiation	Yes	86	400	0	0	Regional	Single (never married)	802	1764	3491	6586	770	550	4305	34	Dead	Active follow-up	Dead (attributable to this cancer dx)	Alive or dead due to cancer
52	White	Female	C41.4-Pelvic bones, sacrum, coccyx and associated joints	Unknown	Positive histology	9260/3: Ewing sarcoma	T3	N0	M1a	None; diagnosed at autopsy	Not recommended	No radiation and/or cancer-directed surgery	None/Unknown	Yes	100	820	0	30	Distant	Married (including common law)	718	1472	3901	8074	345	326	4352	13	Dead	Active follow-up	Dead (attributable to this cancer dx)	Alive or dead due to cancer
22	White	Male	C41.2-Vertebral column	Unknown	Positive histology	9260/3: Ewing sarcoma	T1	N0	M0	None; diagnosed at autopsy	Surgery performed	Radiation after surgery	Beam radiation	Yes	15	400	0	0	Regional	Single (never married)	524	1309	3501	7304	536	478	4210	106	Alive	Active follow-up	Alive or dead of other cause	Alive or dead due to cancer
84	White	Female	C49.1-Conn, subcutaneous, other soft tis: upr limb, shoulder	Unknown	Positive histology	9260/3: Ewing sarcoma	T2b	N1	M0	None; diagnosed at autopsy	Not recommended	No radiation and/or cancer-directed surgery	Beam radiation	No/Unknown	120	420	100	0	Regional	Widowed	1050	1881	4498	6355	782	460	4883	8	Dead	Active follow-up	N/A not first tumor	N/A not first tumor
48	White	Male	C62.9-Testis, NOS	Unknown	Positive histology	9260/3: Ewing sarcoma	NA	NA	NA	None; diagnosed at autopsy	Surgery performed	Radiation after surgery	Beam radiation	Yes	999	999	999	99	Unstaged	Single (never married)	802	1764	3491	6586	770	550	4305	69	Dead	Active follow-up	N/A not first tumor	N/A not first tumor
17	White	Male	C40.2-Long bones of lower limb and associated joints	Unknown	Positive histology	9260/3: Ewing sarcoma	T2	N1	M0	None; diagnosed at autopsy	Surgery performed	No radiation and/or cancer-directed surgery	None/Unknown	Yes	105	400	100	0	Regional	Single (never married)	524	1309	3501	7304	536	478	4210	50	Dead	Active follow-up	Dead (attributable to this cancer dx)	Alive or dead due to cancer
22	Other (American Indian/AK Native, Asian/Pacific Islander)	Male	C40.0-Long bones: upper limb, scapula, and associated joints	Unknown	Positive histology	9260/3: Ewing sarcoma	T2	N0	M0	None; diagnosed at autopsy	Not recommended	No radiation and/or cancer-directed surgery	Beam radiation	Yes	110	400	0	0	Regional	Single (never married)	718	1472	3901	8074	345	326	4352	103	Alive	Active follow-up	Alive or dead of other cause	Alive or dead due to cancer
11	White	Male	C40.2-Long bones of lower limb and associated joints	Moderately differentiated; Grade II	Positive histology	9260/3: Ewing sarcoma	T1	N0	M0	None; diagnosed at autopsy	Surgery performed	No radiation and/or cancer-directed surgery	None/Unknown	Yes	80	100	0	0	Localized	Single (never married)	802	1764	3491	6586	770	550	4305	100	Alive	Active follow-up	Alive or dead of other cause	Alive or dead due to cancer
71	White	Male	C47.2-Periph nerves & autonomic nerv sys: lower limb, hip	Unknown	Positive histology	9260/3: Ewing sarcoma	T2a	N0	M1	None; diagnosed at autopsy	Surgery performed	No radiation and/or cancer-directed surgery	None/Unknown	Yes	55	410	0	40	Distant	Married (including common law)	718	1472	3901	8074	345	326	4352	11	Dead	Active follow-up	N/A not first tumor	N/A not first tumor
19	White	Male	C40.0-Long bones: upper limb, scapula, and associated joints	Unknown	Positive histology	9260/3: Ewing sarcoma	T2	N0	M1b	None; diagnosed at autopsy	Not recommended	No radiation and/or cancer-directed surgery	None/Unknown	Yes	117	400	0	40	Distant	Single (never married)	524	1309	3501	7304	536	478	4210	17	Dead	Active follow-up	Dead (attributable to this cancer dx)	Alive or dead due to cancer
28	White	Female	C40.2-Long bones of lower limb and associated joints	Unknown	Positive histology	9260/3: Ewing sarcoma	T1	N0	M0	None; diagnosed at autopsy	Surgery performed	No radiation and/or cancer-directed surgery	None/Unknown	Yes	57	600	0	0	Regional	Married (including common law)	524	1309	3501	7304	536	478	4210	77	Alive	Active follow-up	Alive or dead of other cause	Alive or dead due to cancer
39	White	Female	C49.2-Conn, subcutaneous, other soft tis: lower limb, hip	Unknown	Positive histology	9260/3: Ewing sarcoma	T2NOS	N0	M0	None; diagnosed at autopsy	Not recommended	No radiation and/or cancer-directed surgery	None/Unknown	Yes	65	400	0	0	Regional	Married (including common law)	524	1309	3501	7304	536	478	4210	95	Alive	Active follow-up	Alive or dead of other cause	Alive or dead due to cancer
12	Other (American Indian/AK Native, Asian/Pacific Islander)	Male	C48.0-Retroperitoneum	Undifferentiated; anaplastic; Grade IV	Positive histology	9260/3: Ewing sarcoma	T2b	NX	M1	None; diagnosed at autopsy	Surgery performed	Radiation after surgery	Radiation, NOS method or source not specified	Yes	115	600	999	40	Distant	Single (never married)	718	1472	3901	8074	345	326	4352	94	Alive	Active follow-up	Alive or dead of other cause	Alive or dead due to cancer
56	White	Male	C40.2-Long bones of lower limb and associated joints	Well differentiated; Grade I	Positive histology	9261/3: Adamantinoma of long bones	TX	N0	M0	None; diagnosed at autopsy	Surgery performed	No radiation and/or cancer-directed surgery	None/Unknown	No/Unknown	999	400	0	0	Regional	Married (including common law)	718	1472	3901	8074	345	326	4352	91	Alive	Active follow-up	Alive or dead of other cause	Alive or dead due to cancer
31	Other (American Indian/AK Native, Asian/Pacific Islander)	Female	C67.2-Lateral wall of bladder	Unknown	Positive histology	9260/3: Ewing sarcoma	NA	NA	NA	None; diagnosed at autopsy	Surgery performed	Radiation after surgery	Beam radiation	Yes	90	240	0	0	Regional	Married (including common law)	718	1472	3901	8074	345	326	4352	79	Alive	Active follow-up	Alive or dead of other cause	Alive or dead due to cancer
17	Other (American Indian/AK Native, Asian/Pacific Islander)	Male	C49.5-Conn, subcutaneous, other soft tis: pelvis	Unknown	Positive histology	9260/3: Ewing sarcoma	T2NOS	N0	M0	None; diagnosed at autopsy	Surgery performed	No radiation and/or cancer-directed surgery	None/Unknown	Yes	100	100	0	0	Localized	Single (never married)	718	1472	3901	8074	345	326	4352	76	Alive	Active follow-up	Alive or dead of other cause	Alive or dead due to cancer
11	White	Male	C40.2-Long bones of lower limb and associated joints	Undifferentiated; anaplastic; Grade IV	Positive histology	9260/3: Ewing sarcoma	T1	N1	M0	None; diagnosed at autopsy	Surgery performed	Radiation after surgery	Beam radiation	Yes	31	400	100	0	Regional	Single (never married)	524	1309	3501	7304	536	478	4210	76	Alive	Active follow-up	Alive or dead of other cause	Alive or dead due to cancer
16	White	Male	C40.0-Long bones: upper limb, scapula, and associated joints	Undifferentiated; anaplastic; Grade IV	Positive histology	9260/3: Ewing sarcoma	T1	N0	M0	None; diagnosed at autopsy	Not recommended	No radiation and/or cancer-directed surgery	Beam radiation	Yes	30	300	0	0	Localized	Single (never married)	351	875	5131	8893	370	297	5336	74	Alive	Active follow-up	Alive or dead of other cause	Alive or dead due to cancer
77	Other (American Indian/AK Native, Asian/Pacific Islander)	Male	C41.9-Bone, NOS	Unknown	Positive histology	9260/3: Ewing sarcoma	T0	NX	M1b	None; diagnosed at autopsy	Not recommended	No radiation and/or cancer-directed surgery	None/Unknown	No/Unknown	0	950	999	40	Distant	Married (including common law)	1050	1881	4498	6355	782	460	4883	1	Dead	Active follow-up	N/A not first tumor	N/A not first tumor
6	White	Female	C41.3-Rib, sternum, clavicle and associated joints	Unknown	Positive histology	9260/3: Ewing sarcoma	T2	N0	M1b	None; diagnosed at autopsy	Surgery performed	Radiation after surgery	Beam radiation	Yes	130	400	0	40	Distant	Single (never married)	802	1764	3491	6586	770	550	4305	61	Alive	Active follow-up	Alive or dead of other cause	Alive or dead due to cancer
10	White	Male	C40.2-Long bones of lower limb and associated joints	Unknown	Positive histology	9260/3: Ewing sarcoma	T2	N0	M0	None; diagnosed at autopsy	Not recommended	No radiation and/or cancer-directed surgery	Beam radiation	Yes	140	400	0	0	Regional	Single (never married)	351	875	5131	8893	370	297	5336	72	Alive	Active follow-up	Alive or dead of other cause	Alive or dead due to cancer
13	Other (American Indian/AK Native, Asian/Pacific Islander)	Female	C41.4-Pelvic bones, sacrum, coccyx and associated joints	Unknown	Positive histology	9260/3: Ewing sarcoma	TX	N0	M0	None; diagnosed at autopsy	Not recommended	No radiation and/or cancer-directed surgery	Beam radiation	Yes	999	400	0	0	Regional	Single (never married)	802	1764	3491	6586	770	550	4305	70	Alive	Active follow-up	Alive or dead of other cause	Alive or dead due to cancer
12	Other (American Indian/AK Native, Asian/Pacific Islander)	Male	C41.4-Pelvic bones, sacrum, coccyx and associated joints	Unknown	Positive histology	9260/3: Ewing sarcoma	T1	N0	M0	None; diagnosed at autopsy	Not recommended	No radiation and/or cancer-directed surgery	Beam radiation	Yes	80	400	0	0	Regional	Single (never married)	718	1472	3901	8074	345	326	4352	70	Alive	Active follow-up	Alive or dead of other cause	Alive or dead due to cancer
20	White	Male	C41.3-Rib, sternum, clavicle and associated joints	Unknown	Positive histology	9260/3: Ewing sarcoma	T2	N0	M0	None; diagnosed at autopsy	Surgery performed	Radiation after surgery	Beam radiation	Yes	193	800	0	0	Distant	Single (never married)	718	1472	3901	8074	345	326	4352	66	Alive	Active follow-up	Alive or dead of other cause	Alive or dead due to cancer
24	White	Female	C41.4-Pelvic bones, sacrum, coccyx and associated joints	Undifferentiated; anaplastic; Grade IV	Positive histology	9260/3: Ewing sarcoma	T1	N0	M1a	None; diagnosed at autopsy	Surgery performed	Radiation after surgery	Beam radiation	Yes	17	400	0	30	Distant	Single (never married)	1050	1881	4498	6355	782	460	4883	61	Alive	Active follow-up	Alive or dead of other cause	Alive or dead due to cancer
4	Other (American Indian/AK Native, Asian/Pacific Islander)	Male	C41.0-Bones of skull and face and associated joints	Unknown	Positive histology	9260/3: Ewing sarcoma	T1	N0	M0	None; diagnosed at autopsy	Not recommended	No radiation and/or cancer-directed surgery	Beam radiation	Yes	62	600	0	0	Regional	Single (never married)	802	1764	3491	6586	770	550	4305	61	Alive	Active follow-up	Alive or dead of other cause	Alive or dead due to cancer
28	Other (American Indian/AK Native, Asian/Pacific Islander)	Female	C48.0-Retroperitoneum	Unknown	Positive histology	9260/3: Ewing sarcoma	T2b	N0	M0	None; diagnosed at autopsy	Surgery performed	No radiation and/or cancer-directed surgery	None/Unknown	Yes	51	100	0	0	Localized	Divorced	1050	1881	4498	6355	782	460	4883	61	Alive	Active follow-up	Alive or dead of other cause	Alive or dead due to cancer
24	White	Female	C40.2-Long bones of lower limb and associated joints	Poorly differentiated; Grade III	Positive histology	9260/3: Ewing sarcoma	T1	N0	M0	None; diagnosed at autopsy	Surgery performed	No radiation and/or cancer-directed surgery	None/Unknown	Yes	60	400	0	0	Regional	Married (including common law)	802	1764	3491	6586	770	550	4305	59	Alive	Active follow-up	Alive or dead of other cause	Alive or dead due to cancer
27	White	Female	C40.0-Long bones: upper limb, scapula, and associated joints	Poorly differentiated; Grade III	Positive histology	9260/3: Ewing sarcoma	T2	N0	M0	None; diagnosed at autopsy	Not recommended	No radiation and/or cancer-directed surgery	Radiation, NOS method or source not specified	Yes	91	400	0	0	Regional	Single (never married)	351	875	5131	8893	370	297	5336	53	Alive	Active follow-up	Alive or dead of other cause	Alive or dead due to cancer
9	White	Female	C41.3-Rib, sternum, clavicle and associated joints	Unknown	Positive histology	9260/3: Ewing sarcoma	T1	N0	M1a	None; diagnosed at autopsy	Surgery performed	Radiation after surgery	Beam radiation	Yes	46	300	0	30	Distant	Single (never married)	1050	1881	4498	6355	782	460	4883	63	Alive	Active follow-up	Alive or dead of other cause	Alive or dead due to cancer
20	Other (American Indian/AK Native, Asian/Pacific Islander)	Female	C56.9-Ovary	Unknown	Positive histology	9260/3: Ewing sarcoma	NA	NA	NA	None; diagnosed at autopsy	Surgery performed	No radiation and/or cancer-directed surgery	None/Unknown	Yes	19	730	0	40	Distant	Single (never married)	802	1764	3491	6586	770	550	4305	15	Dead	Active follow-up	Dead (attributable to this cancer dx)	Alive or dead due to cancer
23	Other (American Indian/AK Native, Asian/Pacific Islander)	Male	C49.5-Conn, subcutaneous, other soft tis: pelvis	Undifferentiated; anaplastic; Grade IV	Positive histology	9260/3: Ewing sarcoma	T2b	N1	M1	None; diagnosed at autopsy	Not recommended	No radiation and/or cancer-directed surgery	None/Unknown	Yes	100	600	100	40	Distant	Single (never married)	1050	1881	4498	6355	782	460	4883	8	Dead	Active follow-up	Dead (attributable to this cancer dx)	Alive or dead due to cancer
11	Other (American Indian/AK Native, Asian/Pacific Islander)	Male	C49.1-Conn, subcutaneous, other soft tis: upr limb, shoulder	Moderately differentiated; Grade II	Positive histology	9260/3: Ewing sarcoma	T1b	N0	M0	None; diagnosed at autopsy	Surgery performed	No radiation and/or cancer-directed surgery	None/Unknown	Yes	41	120	0	0	Localized	Single (never married)	1050	1881	4498	6355	782	460	4883	55	Alive	Active follow-up	Alive or dead of other cause	Alive or dead due to cancer
14	White	Female	C40.2-Long bones of lower limb and associated joints	Unknown	Positive histology	9260/3: Ewing sarcoma	T2	N0	M0	None; diagnosed at autopsy	Surgery performed	No radiation and/or cancer-directed surgery	None/Unknown	Yes	121	300	0	0	Localized	Single (never married)	718	1472	3901	8074	345	326	4352	48	Alive	Active follow-up	Alive or dead of other cause	Alive or dead due to cancer
19	White	Male	C41.4-Pelvic bones, sacrum, coccyx and associated joints	Unknown	Positive histology	9260/3: Ewing sarcoma	T1	N0	M1a	None; diagnosed at autopsy	Surgery performed	Radiation after surgery	Beam radiation	Yes	77	400	0	30	Distant	Single (never married)	718	1472	3901	8074	345	326	4352	24	Dead	Active follow-up	Dead (attributable to this cancer dx)	Alive or dead due to cancer
19	White	Male	C41.3-Rib, sternum, clavicle and associated joints	Unknown	Positive histology	9260/3: Ewing sarcoma	T2	N0	M0	None; diagnosed at autopsy	Surgery performed	No radiation and/or cancer-directed surgery	None/Unknown	Yes	82	400	0	0	Regional	Single (never married)	1050	1881	4498	6355	782	460	4883	44	Alive	Active follow-up	Alive or dead of other cause	Alive or dead due to cancer
12	White	Male	C41.4-Pelvic bones, sacrum, coccyx and associated joints	Unknown	Positive histology	9260/3: Ewing sarcoma	T2	N1	M1b	None; diagnosed at autopsy	Not recommended	No radiation and/or cancer-directed surgery	Beam radiation	Yes	130	350	100	40	Distant	Single (never married)	802	1764	3491	6586	770	550	4305	42	Alive	Active follow-up	Alive or dead of other cause	Alive or dead due to cancer
24	White	Male	C41.4-Pelvic bones, sacrum, coccyx and associated joints	Unknown	Positive histology	9260/3: Ewing sarcoma	T2	N0	M0	None; diagnosed at autopsy	Not recommended	No radiation and/or cancer-directed surgery	Beam radiation	Yes	98	400	0	0	Regional	Single (never married)	1050	1881	4498	6355	782	460	4883	40	Alive	Active follow-up	Alive or dead of other cause	Alive or dead due to cancer
15	Other (American Indian/AK Native, Asian/Pacific Islander)	Female	C41.4-Pelvic bones, sacrum, coccyx and associated joints	Unknown	Positive histology	9260/3: Ewing sarcoma	T2	N0	M1b	None; diagnosed at autopsy	Not recommended	No radiation and/or cancer-directed surgery	Beam radiation	Yes	130	400	0	40	Distant	Single (never married)	802	1764	3491	6586	770	550	4305	9	Dead	Active follow-up	Dead (attributable to this cancer dx)	Alive or dead due to cancer
24	White	Male	C40.2-Long bones of lower limb and associated joints	Unknown	Positive histology	9260/3: Ewing sarcoma	T2	N0	M1b	None; diagnosed at autopsy	Not recommended	No radiation and/or cancer-directed surgery	Beam radiation	Yes	146	400	0	40	Distant	Separated	718	1472	3901	8074	345	326	4352	17	Dead	Active follow-up	Dead (attributable to this cancer dx)	Alive or dead due to cancer
46	White	Female	C41.2-Vertebral column	Unknown	Positive histology	9260/3: Ewing sarcoma	T1	N0	M0	None; diagnosed at autopsy	Surgery performed	No radiation and/or cancer-directed surgery	None/Unknown	Yes	29	400	0	0	Regional	Married (including common law)	1050	1881	4498	6355	782	460	4883	39	Alive	Active follow-up	Alive or dead of other cause	Alive or dead due to cancer
11	Other (American Indian/AK Native, Asian/Pacific Islander)	Female	C41.2-Vertebral column	Unknown	Positive histology	9260/3: Ewing sarcoma	T1	N0	M0	None; diagnosed at autopsy	Not recommended	No radiation and/or cancer-directed surgery	None/Unknown	Yes	16	300	0	0	Localized	Single (never married)	802	1764	3491	6586	770	550	4305	37	Alive	Active follow-up	Alive or dead of other cause	Alive or dead due to cancer
11	White	Male	C40.2-Long bones of lower limb and associated joints	Unknown	Positive histology	9260/3: Ewing sarcoma	T3	N0	M1NOS	None; diagnosed at autopsy	Not recommended	No radiation and/or cancer-directed surgery	Beam radiation	Yes	16	820	0	60	Distant	Single (never married)	524	1309	3501	7304	536	478	4210	21	Alive	Active follow-up	Alive or dead of other cause	Alive or dead due to cancer
1	White	Male	C40.0-Long bones: upper limb, scapula, and associated joints	Unknown	Positive histology	9260/3: Ewing sarcoma	T1	N0	M0	None; diagnosed at autopsy	Not recommended	No radiation and/or cancer-directed surgery	Beam radiation	Yes	54	300	0	0	Localized	Single (never married)	802	1764	3491	6586	770	550	4305	21	Alive	Active follow-up	Alive or dead of other cause	Alive or dead due to cancer
16	Other (American Indian/AK Native, Asian/Pacific Islander)	Male	C40.0-Long bones: upper limb, scapula, and associated joints	Unknown	Positive histology	9260/3: Ewing sarcoma	T2	N0	M0	None; diagnosed at autopsy	Not recommended	No radiation and/or cancer-directed surgery	Beam radiation	Yes	90	350	0	0	Localized	Single (never married)	1050	1881	4498	6355	782	460	4883	18	Alive	Active follow-up	Alive or dead of other cause	Alive or dead due to cancer
19	White	Male	C40.2-Long bones of lower limb and associated joints	Unknown	Positive histology	9260/3: Ewing sarcoma	T2	N0	M0	None; diagnosed at autopsy	Surgery performed	No radiation and/or cancer-directed surgery	None/Unknown	Yes	150	350	0	0	Localized	Single (never married)	802	1764	3491	6586	770	550	4305	22	Alive	Active follow-up	Alive or dead of other cause	Alive or dead due to cancer
16	Other (American Indian/AK Native, Asian/Pacific Islander)	Female	C41.2-Vertebral column	Unknown	Positive histology	9260/3: Ewing sarcoma	TX	N0	M0	None; diagnosed at autopsy	Not recommended	No radiation and/or cancer-directed surgery	Beam radiation	Yes	54	999	0	0	Unstaged	Single (never married)	802	1764	3491	6586	770	550	4305	19	Alive	Active follow-up	Alive or dead of other cause	Alive or dead due to cancer
10	Other (American Indian/AK Native, Asian/Pacific Islander)	Female	C40.2-Long bones of lower limb and associated joints	Unknown	Positive histology	9260/3: Ewing sarcoma	T2	N0	M1b	None; diagnosed at autopsy	Not recommended	No radiation and/or cancer-directed surgery	Beam radiation	Yes	100	400	0	40	Distant	Single (never married)	802	1764	3491	6586	770	550	4305	10	Alive	Active follow-up	Alive or dead of other cause	Alive or dead due to cancer
19	White	Female	C49.2-Conn, subcutaneous, other soft tis: lower limb, hip	Poorly differentiated; Grade III	Positive histology	9260/3: Ewing sarcoma	T2b	N0	M0	None; diagnosed at autopsy	Surgery performed	No radiation and/or cancer-directed surgery	None/Unknown	Yes	88	620	0	0	Regional	Single (never married)	802	1764	3491	6586	770	550	4305	4	Alive	Active follow-up	Alive or dead of other cause	Alive or dead due to cancer
18	White	Female	C40.3-Short bones of lower limb and associated joints	Unknown	Positive histology	9260/3: Ewing sarcoma	T1	N0	M0	None; diagnosed at autopsy	Not recommended	No radiation and/or cancer-directed surgery	None/Unknown	No/Unknown	26	600	0	0	Regional	Single (never married)	1050	1881	4498	6355	782	460	4883	2	Alive	Active follow-up	Alive or dead of other cause	Alive or dead due to cancer
26	Other (American Indian/AK Native, Asian/Pacific Islander)	Female	C49.2-Conn, subcutaneous, other soft tis: lower limb, hip	Undifferentiated; anaplastic; Grade IV	Positive histology	9260/3: Ewing sarcoma	T1b	N0	M0	None; diagnosed at autopsy	Surgery performed	No radiation and/or cancer-directed surgery	None/Unknown	Yes	48	120	0	0	Localized	Single (never married)	524	1309	3501	7304	536	478	4210	0	Alive	Active follow-up	Alive or dead of other cause	Alive or dead due to cancer
30	White	Male	C40.2-Long bones of lower limb and associated joints	Unknown	Positive histology	9260/3: Ewing sarcoma	T3	N0	M1a	None; diagnosed at autopsy	Surgery performed	Radiation after surgery	Beam radiation	Yes	70	820	0	30	Distant	Married (including common law)	802	1764	3491	6586	770	550	4305	24	Alive	Active follow-up	Alive or dead of other cause	Alive or dead due to cancer
17	Black	Male	C41.4-Pelvic bones, sacrum, coccyx and associated joints	Unknown	Positive histology	9260/3: Ewing sarcoma	T2	N0	M0	None; diagnosed at autopsy	Not recommended	No radiation and/or cancer-directed surgery	Beam radiation	Yes	165	400	0	0	Regional	Single (never married)	620	1563	3985	7769	500	476	4453	67	Dead	Active follow-up	Dead (attributable to this cancer dx)	Alive or dead due to cancer
15	White	Female	C41.4-Pelvic bones, sacrum, coccyx and associated joints	Unknown	Positive histology	9260/3: Ewing sarcoma	T1	N0	M0	None; diagnosed at autopsy	Surgery performed	Radiation after surgery	Beam radiation	Yes	30	300	0	0	Localized	Single (never married)	620	1563	3985	7769	500	476	4453	116	Alive	Active follow-up	Alive or dead of other cause	Alive or dead due to cancer
18	White	Female	C41.4-Pelvic bones, sacrum, coccyx and associated joints	Unknown	Positive histology	9260/3: Ewing sarcoma	T1	N0	M0	None; diagnosed at autopsy	Surgery performed	Radiation prior to surgery	Beam radiation	Yes	76	400	0	0	Regional	Single (never married)	329	1127	3380	7132	234	484	4320	112	Alive	Active follow-up	Alive or dead of other cause	Alive or dead due to cancer
16	White	Male	C49.3-Conn, subcutaneous, other soft tis: thorax	Unknown	Positive exfoliative cytology, no positive histology	9260/3: Ewing sarcoma	T2b	N0	M0	Non-primary surgical procedure to other regional sites	Surgery performed	No radiation and/or cancer-directed surgery	None/Unknown	Yes	60	620	0	0	Regional	Single (never married)	604	1699	2763	6055	697	590	3827	54	Dead	Active follow-up	Alive or dead of other cause	Dead (attributable to causes other than this cancer dx)
15	White	Male	C49.3-Conn, subcutaneous, other soft tis: thorax	Unknown	Positive histology	9260/3: Ewing sarcoma	T2b	NX	M0	None; diagnosed at autopsy	Surgery performed	No radiation and/or cancer-directed surgery	None/Unknown	Yes	140	120	999	0	Localized	Single (never married)	649	1764	2960	6214	707	616	3979	109	Alive	Active follow-up	Alive or dead of other cause	Alive or dead due to cancer
13	White	Male	C40.2-Long bones of lower limb and associated joints	Unknown	Positive histology	9261/3: Adamantinoma of long bones	T1	N0	M0	None; diagnosed at autopsy	Surgery performed	No radiation and/or cancer-directed surgery	None/Unknown	No/Unknown	22	100	0	0	Localized	Single (never married)	649	1764	2960	6214	707	616	3979	96	Alive	Active follow-up	Alive or dead of other cause	Alive or dead due to cancer
1	White	Female	C01.9-Base of tongue, NOS	Unknown	Positive histology	9260/3: Ewing sarcoma	NA	NA	NA	None; diagnosed at autopsy	Surgery performed	Radiation after surgery	Beam radiation	Yes	40	400	999	0	Regional	Single (never married)	442	1411	2747	6645	270	381	3692	101	Alive	Active follow-up	Alive or dead of other cause	Alive or dead due to cancer
11	White	Female	C41.2-Vertebral column	Unknown	Positive histology	9260/3: Ewing sarcoma	TX	N0	M0	None; diagnosed at autopsy	Surgery performed	Radiation after surgery	Beam radiation	Yes	999	600	0	0	Regional	Single (never married)	620	1563	3985	7769	500	476	4453	98	Alive	Active follow-up	Alive or dead of other cause	Alive or dead due to cancer
18	White	Male	C41.4-Pelvic bones, sacrum, coccyx and associated joints	Unknown	Positive histology	9260/3: Ewing sarcoma	T1	N0	M0	None; diagnosed at autopsy	Not recommended	No radiation and/or cancer-directed surgery	Beam radiation	Yes	40	600	0	0	Regional	Single (never married)	604	1699	2763	6055	697	590	3827	101	Alive	Active follow-up	Alive or dead of other cause	Alive or dead due to cancer
51	White	Female	C41.9-Bone, NOS	Unknown	Positive exfoliative cytology, no positive histology	9260/3: Ewing sarcoma	TX	N0	M1b	None; diagnosed at autopsy	Not recommended	No radiation and/or cancer-directed surgery	None/Unknown	Yes	999	999	0	40	Distant	Married (including common law)	463	1396	2623	5986	446	413	3703	42	Dead	Active follow-up	Dead (attributable to this cancer dx)	Alive or dead due to cancer
24	White	Male	C40.2-Long bones of lower limb and associated joints	Unknown	Positive histology	9260/3: Ewing sarcoma	TX	N0	M1b	None; diagnosed at autopsy	Not recommended	No radiation and/or cancer-directed surgery	Beam radiation	Yes	999	600	0	40	Distant	Single (never married)	620	1563	3985	7769	500	476	4453	19	Dead	Active follow-up	Dead (attributable to this cancer dx)	Alive or dead due to cancer
9	White	Male	C40.0-Long bones: upper limb, scapula, and associated joints	Unknown	Positive histology	9260/3: Ewing sarcoma	TX	N0	M0	None; diagnosed at autopsy	Surgery performed	No radiation and/or cancer-directed surgery	None/Unknown	Yes	999	300	0	0	Localized	Single (never married)	620	1563	3985	7769	500	476	4453	90	Alive	Active follow-up	Alive or dead of other cause	Alive or dead due to cancer
14	White	Male	C49.5-Conn, subcutaneous, other soft tis: pelvis	Unknown	Positive histology	9260/3: Ewing sarcoma	T2b	NX	M1	None; diagnosed at autopsy	Not recommended	No radiation and/or cancer-directed surgery	Beam radiation	Yes	102	620	999	40	Distant	Single (never married)	708	2040	1897	5249	573	579	3008	78	Dead	Active follow-up	Dead (attributable to this cancer dx)	Alive or dead due to cancer
17	White	Female	C49.2-Conn, subcutaneous, other soft tis: lower limb, hip	Unknown	Positive histology	9260/3: Ewing sarcoma	TX	N0	M0	None; diagnosed at autopsy	Surgery performed	No radiation and/or cancer-directed surgery	None/Unknown	Yes	999	300	0	0	Localized	Single (never married)	313	1081	3280	7086	293	370	4246	104	Alive	Active follow-up	Alive or dead of other cause	Alive or dead due to cancer
26	White	Male	C49.3-Conn, subcutaneous, other soft tis: thorax	Unknown	Positive histology	9260/3: Ewing sarcoma	T1NOS	N0	M0	None; diagnosed at autopsy	Surgery performed	No radiation and/or cancer-directed surgery	None/Unknown	Yes	19	100	0	0	Localized	Single (never married)	329	1127	3380	7132	234	484	4320	44	Dead	Active follow-up	Dead (attributable to this cancer dx)	Alive or dead due to cancer
19	White	Male	C41.9-Bone, NOS	Undifferentiated; anaplastic; Grade IV	Positive histology	9260/3: Ewing sarcoma	TX	NX	MX	None; diagnosed at autopsy	Recommended but not performed, unknown reason	No radiation and/or cancer-directed surgery	Beam radiation	No/Unknown	999	999	999	99	Unstaged	Single (never married)	620	1563	3985	7769	500	476	4453	42	Dead	Active follow-up	Dead (attributable to this cancer dx)	Alive or dead due to cancer
19	White	Male	C41.2-Vertebral column	Undifferentiated; anaplastic; Grade IV	Positive histology	9260/3: Ewing sarcoma	T1	N0	M0	None; diagnosed at autopsy	Surgery performed	Radiation after surgery	Beam radiation	Yes	42	300	0	0	Localized	Single (never married)	604	1699	2763	6055	697	590	3827	86	Alive	Active follow-up	Alive or dead of other cause	Alive or dead due to cancer
7	White	Female	C49.6-Conn, subcutaneous, other soft tis: trunk, NOS	Unknown	Positive histology	9260/3: Ewing sarcoma	T2b	N0	M0	None; diagnosed at autopsy	Surgery performed	No radiation and/or cancer-directed surgery	None/Unknown	Yes	90	600	0	0	Regional	Single (never married)	604	1699	2763	6055	697	590	3827	86	Alive	Active follow-up	Alive or dead of other cause	Alive or dead due to cancer
8	White	Male	C40.3-Short bones of lower limb and associated joints	Unknown	Positive histology	9260/3: Ewing sarcoma	T1	N0	M0	None; diagnosed at autopsy	Surgery performed	No radiation and/or cancer-directed surgery	None/Unknown	Yes	70	600	0	0	Regional	Single (never married)	649	1764	2960	6214	707	616	3979	86	Alive	Active follow-up	Alive or dead of other cause	Alive or dead due to cancer
13	White	Female	C72.0-Spinal cord	Undifferentiated; anaplastic; Grade IV	Positive histology	9260/3: Ewing sarcoma	NA	NA	NA	None; diagnosed at autopsy	Surgery performed	Radiation after surgery	Beam radiation	Yes	44	300	988	0	Unstaged	Single (never married)	620	1563	3985	7769	500	476	4453	22	Dead	Active follow-up	Alive or dead of other cause	Dead (attributable to causes other than this cancer dx)
10	White	Male	C40.2-Long bones of lower limb and associated joints	Unknown	Positive histology	9260/3: Ewing sarcoma	T1	N0	M0	None; diagnosed at autopsy	Surgery performed	No radiation and/or cancer-directed surgery	None/Unknown	Yes	58	100	0	0	Localized	Single (never married)	649	1764	2960	6214	707	616	3979	87	Alive	Active follow-up	Alive or dead of other cause	Alive or dead due to cancer
29	White	Male	C41.4-Pelvic bones, sacrum, coccyx and associated joints	Poorly differentiated; Grade III	Positive histology	9260/3: Ewing sarcoma	T2	NX	MX	None; diagnosed at autopsy	Not recommended, contraindicated due to other cond; autopsy only (1973-2002)	No radiation and/or cancer-directed surgery	Recommended, unknown if administered	Yes	130	400	999	99	Regional	Married (including common law)	620	1563	3985	7769	500	476	4453	28	Dead	Active follow-up	Dead (attributable to this cancer dx)	Alive or dead due to cancer
20	White	Female	C41.3-Rib, sternum, clavicle and associated joints	Undifferentiated; anaplastic; Grade IV	Positive histology	9260/3: Ewing sarcoma	T1	N0	M0	None; diagnosed at autopsy	Surgery performed	No radiation and/or cancer-directed surgery	None/Unknown	Yes	80	400	0	0	Regional	Single (never married)	620	1563	3985	7769	500	476	4453	77	Alive	Active follow-up	Alive or dead of other cause	Alive or dead due to cancer
11	White	Male	C40.2-Long bones of lower limb and associated joints	Unknown	Positive histology	9260/3: Ewing sarcoma	TX	N1	M1b	None; diagnosed at autopsy	Not recommended	No radiation and/or cancer-directed surgery	None/Unknown	Yes	999	300	100	40	Distant	Single (never married)	604	1699	2763	6055	697	590	3827	9	Alive	Active follow-up	Alive or dead of other cause	Alive or dead due to cancer
44	White	Male	C40.2-Long bones of lower limb and associated joints	Unknown	Positive histology	9261/3: Adamantinoma of long bones	T1	N0	M0	None; diagnosed at autopsy	Surgery performed	No radiation and/or cancer-directed surgery	None/Unknown	No/Unknown	45	200	0	0	Localized	Married (including common law)	604	1699	2763	6055	697	590	3827	73	Alive	Active follow-up	Alive or dead of other cause	Alive or dead due to cancer
38	White	Male	C49.4-Conn, subcutaneous, other soft tis: abdomen	Poorly differentiated; Grade III	Positive histology	9260/3: Ewing sarcoma	TX	N0	M1	None; diagnosed at autopsy	Not recommended	No radiation and/or cancer-directed surgery	None/Unknown	Yes	999	999	0	40	Distant	Married (including common law)	708	2040	1897	5249	573	579	3008	13	Dead	Active follow-up	Dead (attributable to this cancer dx)	Alive or dead due to cancer
22	White	Male	C40.2-Long bones of lower limb and associated joints	Unknown	Positive histology	9260/3: Ewing sarcoma	T2	N0	M1b	None; diagnosed at autopsy	Not recommended	No radiation and/or cancer-directed surgery	Beam radiation	Yes	200	600	0	40	Distant	Single (never married)	604	1699	2763	6055	697	590	3827	14	Dead	Active follow-up	Dead (attributable to this cancer dx)	Alive or dead due to cancer
19	White	Female	C64.9-Kidney, NOS	Unknown	Positive histology	9260/3: Ewing sarcoma	NA	NA	NA	None; diagnosed at autopsy	Surgery performed	Radiation after surgery	Beam radiation	Yes	190	999	100	0	Regional	Single (never married)	649	1764	2960	6214	707	616	3979	75	Alive	Active follow-up	Alive or dead of other cause	Alive or dead due to cancer
17	White	Female	C74.9-Adrenal gland, NOS	Unknown	Positive histology	9260/3: Ewing sarcoma	NA	NA	NA	None; diagnosed at autopsy	Not recommended	No radiation and/or cancer-directed surgery	Beam radiation	Yes	150	800	999	40	Blank(s)	Single (never married)	329	1127	3380	7132	234	484	4320	23	Dead	Active follow-up	Dead (attributable to this cancer dx)	Alive or dead due to cancer
13	White	Female	C40.2-Long bones of lower limb and associated joints	Unknown	Positive histology	9260/3: Ewing sarcoma	T2	N0	M0	None; diagnosed at autopsy	Surgery performed	No radiation and/or cancer-directed surgery	None/Unknown	Yes	110	200	0	0	Localized	Single (never married)	604	1699	2763	6055	697	590	3827	63	Alive	Active follow-up	Alive or dead of other cause	Alive or dead due to cancer
8	White	Male	C41.4-Pelvic bones, sacrum, coccyx and associated joints	Unknown	Positive histology	9260/3: Ewing sarcoma	TX	NX	M0	None; diagnosed at autopsy	Not recommended	No radiation and/or cancer-directed surgery	Beam radiation	Yes	999	300	999	0	Localized	Single (never married)	604	1699	2763	6055	697	590	3827	62	Alive	Active follow-up	Alive or dead of other cause	Alive or dead due to cancer
25	White	Female	C40.0-Long bones: upper limb, scapula, and associated joints	Moderately differentiated; Grade II	Positive histology	9260/3: Ewing sarcoma	T1	N0	M0	Non-primary surgical procedure to other regional sites	Surgery performed	No radiation and/or cancer-directed surgery	None/Unknown	Yes	60	400	0	0	Regional	Married (including common law)	649	1764	2960	6214	707	616	3979	13	Alive	Active follow-up	Alive or dead of other cause	Alive or dead due to cancer
20	White	Female	C41.8-Overlap bones, joints, and art. cartilage	Unknown	Positive histology	9260/3: Ewing sarcoma	TX	N0	M0	Non-primary surgical procedure to distant site	Not recommended	No radiation and/or cancer-directed surgery	None/Unknown	Yes	999	999	0	0	Unstaged	Unknown	604	1699	2763	6055	697	590	3827	10	Dead	Active follow-up	Dead (attributable to this cancer dx)	Alive or dead due to cancer
31	White	Female	C48.0-Retroperitoneum	Undifferentiated; anaplastic; Grade IV	Positive histology	9260/3: Ewing sarcoma	T2b	N0	M1	Non-primary surgical procedure to other regional sites	Surgery performed	Radiation prior to surgery	Beam radiation	Yes	300	600	0	40	Distant	Married (including common law)	463	1396	2623	5986	446	413	3703	9	Dead	Active follow-up	Dead (attributable to this cancer dx)	Alive or dead due to cancer
52	White	Male	C41.4-Pelvic bones, sacrum, coccyx and associated joints	Undifferentiated; anaplastic; Grade IV	Positive histology	9260/3: Ewing sarcoma	T1	N0	M0	None; diagnosed at autopsy	Surgery performed	Radiation prior to surgery	Beam radiation	Yes	60	400	0	0	Regional	Married (including common law)	620	1563	3985	7769	500	476	4453	17	Dead	Active follow-up	Dead (attributable to this cancer dx)	Alive or dead due to cancer
12	White	Male	C40.2-Long bones of lower limb and associated joints	Unknown	Positive histology	9260/3: Ewing sarcoma	T2	N0	M0	None; diagnosed at autopsy	Not recommended	No radiation and/or cancer-directed surgery	None/Unknown	Yes	208	100	0	0	Localized	Single (never married)	620	1563	3985	7769	500	476	4453	66	Alive	Active follow-up	Alive or dead of other cause	Alive or dead due to cancer
12	White	Male	C41.4-Pelvic bones, sacrum, coccyx and associated joints	Unknown	Positive histology	9260/3: Ewing sarcoma	T1	NX	M1a	None; diagnosed at autopsy	Not recommended	No radiation and/or cancer-directed surgery	None/Unknown	Yes	70	600	999	30	Distant	Single (never married)	649	1764	2960	6214	707	616	3979	59	Alive	Active follow-up	Alive or dead of other cause	Alive or dead due to cancer
50	White	Female	C49.1-Conn, subcutaneous, other soft tis: upr limb, shoulder	Poorly differentiated; Grade III	Positive histology	9260/3: Ewing sarcoma	T2NOS	N0	M0	None; diagnosed at autopsy	Not recommended	No radiation and/or cancer-directed surgery	Beam radiation	No/Unknown	57	100	0	0	Localized	Married (including common law)	649	1764	2960	6214	707	616	3979	25	Alive	Active follow-up	N/A not first tumor	N/A not first tumor
10	White	Male	C41.4-Pelvic bones, sacrum, coccyx and associated joints	Unknown	Positive histology	9260/3: Ewing sarcoma	TX	NX	M0	None; diagnosed at autopsy	Surgery performed	No radiation and/or cancer-directed surgery	None/Unknown	Yes	999	100	999	0	Localized	Single (never married)	649	1764	2960	6214	707	616	3979	43	Dead	Active follow-up	Dead (attributable to this cancer dx)	Alive or dead due to cancer
25	White	Male	C40.0-Long bones: upper limb, scapula, and associated joints	Unknown	Positive histology	9260/3: Ewing sarcoma	T1	N0	M0	None; diagnosed at autopsy	Surgery performed	No radiation and/or cancer-directed surgery	None/Unknown	Yes	80	400	0	0	Regional	Single (never married)	604	1699	2763	6055	697	590	3827	57	Alive	Active follow-up	Alive or dead of other cause	Alive or dead due to cancer
9	White	Female	C41.4-Pelvic bones, sacrum, coccyx and associated joints	Unknown	Positive histology	9260/3: Ewing sarcoma	T1	N0	M0	None; diagnosed at autopsy	Surgery performed	Radiation after surgery	Beam radiation	Yes	41	400	0	0	Regional	Single (never married)	604	1699	2763	6055	697	590	3827	58	Alive	Active follow-up	Alive or dead of other cause	Alive or dead due to cancer
35	White	Male	C41.2-Vertebral column	Unknown	Positive histology	9260/3: Ewing sarcoma	T1	N0	M1NOS	Non-primary surgical procedure performed	Not recommended	No radiation and/or cancer-directed surgery	None/Unknown	Yes	47	800	0	60	Distant	Single (never married)	604	1699	2763	6055	697	590	3827	13	Dead	Active follow-up	Dead (attributable to this cancer dx)	Alive or dead due to cancer
25	White	Male	C49.2-Conn, subcutaneous, other soft tis: lower limb, hip	Unknown	Positive histology	9260/3: Ewing sarcoma	T1a	N0	M0	None; diagnosed at autopsy	Surgery performed	Radiation after surgery	Beam radiation	Yes	50	110	0	0	Localized	Single (never married)	620	1563	3985	7769	500	476	4453	44	Alive	Active follow-up	Alive or dead of other cause	Alive or dead due to cancer
26	Black	Female	C74.9-Adrenal gland, NOS	Unknown	Positive histology	9260/3: Ewing sarcoma	NA	NA	NA	Non-primary surgical procedure to other regional sites	Surgery performed	Radiation after surgery	Beam radiation	Yes	120	605	0	0	Blank(s)	Single (never married)	463	1396	2623	5986	446	413	3703	41	Alive	Active follow-up	Alive or dead of other cause	Alive or dead due to cancer
14	White	Male	C41.4-Pelvic bones, sacrum, coccyx and associated joints	Unknown	Positive histology	9260/3: Ewing sarcoma	TX	N0	M0	None; diagnosed at autopsy	Not recommended	No radiation and/or cancer-directed surgery	Beam radiation	Yes	999	200	0	0	Localized	Single (never married)	620	1563	3985	7769	500	476	4453	47	Alive	Active follow-up	Alive or dead of other cause	Alive or dead due to cancer
33	White	Male	C41.2-Vertebral column	Unknown	Positive histology	9260/3: Ewing sarcoma	T2	N0	M0	None; diagnosed at autopsy	Surgery performed	Radiation after surgery	Beam radiation	Yes	997	350	0	0	Localized	Single (never married)	329	1127	3380	7132	234	484	4320	8	Alive	Active follow-up	Alive or dead of other cause	Alive or dead due to cancer
11	White	Female	C40.2-Long bones of lower limb and associated joints	Unknown	Positive histology	9260/3: Ewing sarcoma	T3	N0	M1b	None; diagnosed at autopsy	Recommended, unknown if performed	No radiation and/or cancer-directed surgery	None/Unknown	Yes	999	820	0	53	Distant	Single (never married)	620	1563	3985	7769	500	476	4453	8	Dead	Active follow-up	Dead (attributable to this cancer dx)	Alive or dead due to cancer
14	White	Female	C40.0-Long bones: upper limb, scapula, and associated joints	Unknown	Positive histology	9260/3: Ewing sarcoma	T1	N0	M0	None; diagnosed at autopsy	Surgery performed	No radiation and/or cancer-directed surgery	None/Unknown	Yes	74	400	0	0	Regional	Single (never married)	649	1764	2960	6214	707	616	3979	45	Alive	Active follow-up	Alive or dead of other cause	Alive or dead due to cancer
7	Other (American Indian/AK Native, Asian/Pacific Islander)	Male	C40.2-Long bones of lower limb and associated joints	Unknown	Positive histology	9260/3: Ewing sarcoma	TX	NX	M0	None; diagnosed at autopsy	Surgery performed	No radiation and/or cancer-directed surgery	None/Unknown	Yes	999	999	999	0	Unstaged	Single (never married)	604	1699	2763	6055	697	590	3827	42	Alive	Active follow-up	Alive or dead of other cause	Alive or dead due to cancer
26	White	Male	C40.2-Long bones of lower limb and associated joints	Unknown	Positive histology	9260/3: Ewing sarcoma	TX	NX	M0	None; diagnosed at autopsy	Surgery performed	No radiation and/or cancer-directed surgery	None/Unknown	Yes	999	999	999	0	Unstaged	Single (never married)	649	1764	2960	6214	707	616	3979	42	Alive	Active follow-up	Alive or dead of other cause	Alive or dead due to cancer
12	Black	Female	C48.0-Retroperitoneum	Unknown	Positive histology	9260/3: Ewing sarcoma	TX	NX	M0	None; diagnosed at autopsy	Not recommended	No radiation and/or cancer-directed surgery	Beam radiation	Yes	999	600	999	0	Regional	Single (never married)	708	2040	1897	5249	573	579	3008	42	Alive	Active follow-up	Alive or dead of other cause	Alive or dead due to cancer
3	White	Female	C40.3-Short bones of lower limb and associated joints	Unknown	Positive histology	9260/3: Ewing sarcoma	TX	N0	M1b	None; diagnosed at autopsy	Surgery performed	Radiation after surgery	Beam radiation	Yes	999	400	0	40	Distant	Single (never married)	708	2040	1897	5249	573	579	3008	41	Alive	Active follow-up	Alive or dead of other cause	Alive or dead due to cancer
17	White	Male	C76.1-Thorax, NOS	Unknown	Positive histology	9260/3: Ewing sarcoma	NA	NA	NA	None; diagnosed at autopsy	Not recommended	No radiation and/or cancer-directed surgery	Beam radiation	Yes	999	988	988	98	Unstaged	Single (never married)	604	1699	2763	6055	697	590	3827	39	Alive	Active follow-up	Alive or dead of other cause	Alive or dead due to cancer
42	White	Female	C41.2-Vertebral column	Undifferentiated; anaplastic; Grade IV	Positive histology	9260/3: Ewing sarcoma	T1	N0	M0	None; diagnosed at autopsy	Surgery performed	Radiation after surgery	Beam radiation	Yes	68	600	0	0	Regional	Married (including common law)	604	1699	2763	6055	697	590	3827	19	Dead	Active follow-up	Dead (attributable to this cancer dx)	Alive or dead due to cancer
12	White	Male	C41.2-Vertebral column	Unknown	Positive histology	9260/3: Ewing sarcoma	T3	N0	M1b	None; diagnosed at autopsy	Not recommended	No radiation and/or cancer-directed surgery	Beam radiation	Yes	999	820	0	40	Distant	Single (never married)	620	1563	3985	7769	500	476	4453	18	Dead	Active follow-up	Dead (attributable to this cancer dx)	Alive or dead due to cancer
31	Other (American Indian/AK Native, Asian/Pacific Islander)	Male	C41.3-Rib, sternum, clavicle and associated joints	Poorly differentiated; Grade III	Positive histology	9260/3: Ewing sarcoma	T1	NX	M0	None; diagnosed at autopsy	Surgery performed	No radiation and/or cancer-directed surgery	None/Unknown	Yes	45	600	999	0	Regional	Married (including common law)	620	1563	3985	7769	500	476	4453	28	Alive	Active follow-up	Alive or dead of other cause	Alive or dead due to cancer
56	White	Male	C49.5-Conn, subcutaneous, other soft tis: pelvis	Undifferentiated; anaplastic; Grade IV	Positive histology	9260/3: Ewing sarcoma	T2b	N0	M0	None; diagnosed at autopsy	Surgery performed	Radiation after surgery	Beam radiation	Yes	94	420	0	0	Regional	Married (including common law)	463	1396	2623	5986	446	413	3703	32	Alive	Active follow-up	Alive or dead of other cause	Alive or dead due to cancer
16	White	Male	C41.4-Pelvic bones, sacrum, coccyx and associated joints	Unknown	Positive histology	9260/3: Ewing sarcoma	T1	N0	M0	None; diagnosed at autopsy	Surgery performed	Radiation after surgery	Beam radiation	Yes	50	300	0	0	Localized	Single (never married)	442	1411	2747	6645	270	381	3692	23	Alive	Active follow-up	Alive or dead of other cause	Alive or dead due to cancer
21	White	Male	C40.2-Long bones of lower limb and associated joints	Unknown	Positive histology	9260/3: Ewing sarcoma	T1	N0	M0	None; diagnosed at autopsy	Surgery performed	No radiation and/or cancer-directed surgery	None/Unknown	Yes	69	200	0	0	Localized	Single (never married)	620	1563	3985	7769	500	476	4453	16	Alive	Active follow-up	Alive or dead of other cause	Alive or dead due to cancer
10	White	Female	C41.4-Pelvic bones, sacrum, coccyx and associated joints	Unknown	Positive histology	9260/3: Ewing sarcoma	T1	N0	M1NOS	None; diagnosed at autopsy	Not recommended	No radiation and/or cancer-directed surgery	Beam radiation	Yes	73	800	0	60	Distant	Single (never married)	463	1396	2623	5986	446	413	3703	22	Alive	Active follow-up	Alive or dead of other cause	Alive or dead due to cancer
25	White	Male	C41.4-Pelvic bones, sacrum, coccyx and associated joints	Unknown	Positive histology	9260/3: Ewing sarcoma	TX	N0	M1b	None; diagnosed at autopsy	Not recommended	No radiation and/or cancer-directed surgery	Beam radiation	Yes	999	300	0	50	Distant	Single (never married)	442	1411	2747	6645	270	381	3692	21	Alive	Active follow-up	Alive or dead of other cause	Alive or dead due to cancer
18	White	Male	C64.9-Kidney, NOS	Undifferentiated; anaplastic; Grade IV	Positive histology	9260/3: Ewing sarcoma	NA	NA	NA	None; diagnosed at autopsy	Surgery performed	No radiation and/or cancer-directed surgery	None/Unknown	Yes	75	460	0	40	Distant	Single (never married)	442	1411	2747	6645	270	381	3692	12	Alive	Active follow-up	Alive or dead of other cause	Alive or dead due to cancer
11	White	Female	C40.2-Long bones of lower limb and associated joints	Unknown	Positive histology	9260/3: Ewing sarcoma	T2	N0	M0	None; diagnosed at autopsy	Surgery performed	No radiation and/or cancer-directed surgery	None/Unknown	Yes	190	100	0	0	Localized	Single (never married)	708	2040	1897	5249	573	579	3008	8	Alive	Active follow-up	Alive or dead of other cause	Alive or dead due to cancer
43	Black	Female	C40.2-Long bones of lower limb and associated joints	Unknown	Positive histology	9261/3: Adamantinoma of long bones	T1	N0	M0	None; diagnosed at autopsy	Surgery performed	No radiation and/or cancer-directed surgery	None/Unknown	No/Unknown	37	300	0	0	Localized	Single (never married)	463	1396	2623	5986	446	413	3703	6	Alive	Active follow-up	Alive or dead of other cause	Alive or dead due to cancer
25	White	Female	C49.5-Conn, subcutaneous, other soft tis: pelvis	Poorly differentiated; Grade III	Positive histology	9260/3: Ewing sarcoma	T2b	N0	M0	None; diagnosed at autopsy	Recommended, unknown if performed	No radiation and/or cancer-directed surgery	None/Unknown	Yes	137	420	0	0	Regional	Single (never married)	620	1563	3985	7769	500	476	4453	8	Alive	Active follow-up	Alive or dead of other cause	Alive or dead due to cancer
23	White	Male	C41.3-Rib, sternum, clavicle and associated joints	Unknown	Positive histology	9260/3: Ewing sarcoma	T1	N0	M0	None; diagnosed at autopsy	Surgery performed	No radiation and/or cancer-directed surgery	None/Unknown	Yes	45	200	0	0	Localized	Single (never married)	649	1764	2960	6214	707	616	3979	11	Alive	Active follow-up	Alive or dead of other cause	Alive or dead due to cancer
12	White	Male	C41.0-Bones of skull and face and associated joints	Unknown	Positive histology	9260/3: Ewing sarcoma	T1	N0	M0	None; diagnosed at autopsy	Surgery performed	No radiation and/or cancer-directed surgery	Recommended, unknown if administered	Yes	44	310	0	0	Localized	Single (never married)	620	1563	3985	7769	500	476	4453	4	Alive	Active follow-up	Alive or dead of other cause	Alive or dead due to cancer
18	White	Male	C41.9-Bone, NOS	Unknown	Positive histology	9260/3: Ewing sarcoma	TX	N0	M1NOS	None; diagnosed at autopsy	Not recommended	No radiation and/or cancer-directed surgery	Beam radiation	Yes	999	999	0	60	Distant	Single (never married)	649	1764	2960	6214	707	616	3979	8	Alive	Active follow-up	N/A not first tumor	N/A not first tumor
20	Unknown	Female	C40.2-Long bones of lower limb and associated joints	Unknown	Positive histology	9260/3: Ewing sarcoma	T1	N0	M0	None; diagnosed at autopsy	Surgery performed	No radiation and/or cancer-directed surgery	None/Unknown	Yes	29	100	0	0	Localized	Single (never married)	620	1563	3985	7769	500	476	4453	7	Alive	Active follow-up	Alive or dead of other cause	Alive or dead due to cancer
18	Black	Male	C40.2-Long bones of lower limb and associated joints	Moderately differentiated; Grade II	Positive histology	9260/3: Ewing sarcoma	T2	N0	M0	None; diagnosed at autopsy	Surgery performed	Radiation after surgery	Beam radiation	Yes	997	300	0	0	Localized	Single (never married)	620	1563	3985	7769	500	476	4453	0	Alive	Active follow-up	Alive or dead of other cause	Alive or dead due to cancer
12	White	Female	C40.0-Long bones: upper limb, scapula, and associated joints	Unknown	Positive histology	9260/3: Ewing sarcoma	T1	N0	M0	None; diagnosed at autopsy	Surgery performed	Radiation after surgery	Beam radiation	Yes	5	100	0	0	Localized	Single (never married)	463	1396	2623	5986	446	413	3703	2	Alive	Active follow-up	Alive or dead of other cause	Alive or dead due to cancer
57	White	Female	C41.0-Bones of skull and face and associated joints	Unknown	Positive histology	9260/3: Ewing sarcoma	T1	N0	M0	None; diagnosed at autopsy	Not recommended	No radiation and/or cancer-directed surgery	None/Unknown	No/Unknown	59	300	0	0	Localized	Single (never married)	615	2302	1722	4881	1269	850	2931	0	Dead	Active follow-up	N/A not first tumor	N/A not first tumor
31	White	Female	C49.3-Conn, subcutaneous, other soft tis: thorax	Unknown	Positive histology	9260/3: Ewing sarcoma	T1b	N0	M0	None; diagnosed at autopsy	Surgery performed	No radiation and/or cancer-directed surgery	None/Unknown	No/Unknown	50	120	0	0	Localized	Single (never married)	481	1705	1757	6282	402	415	3170	92	Alive	Active follow-up	Alive or dead of other cause	Alive or dead due to cancer
4	White	Male	C40.2-Long bones of lower limb and associated joints	Unknown	Positive histology	9260/3: Ewing sarcoma	TX	N0	M0	None; diagnosed at autopsy	Not recommended	No radiation and/or cancer-directed surgery	None/Unknown	Yes	999	999	0	0	Unstaged	Single (never married)	481	1705	1757	6282	402	415	3170	109	Alive	Active follow-up	Alive or dead of other cause	Alive or dead due to cancer
14	White	Female	C40.2-Long bones of lower limb and associated joints	Unknown	Positive histology	9260/3: Ewing sarcoma	TX	N0	M0	None; diagnosed at autopsy	Not recommended	No radiation and/or cancer-directed surgery	None/Unknown	Yes	999	999	0	0	Unstaged	Single (never married)	615	2302	1722	4881	1269	850	2931	107	Alive	Active follow-up	Alive or dead of other cause	Alive or dead due to cancer
35	White	Male	C41.9-Bone, NOS	Unknown	Positive histology	9260/3: Ewing sarcoma	T0	N0	M1b	None; diagnosed at autopsy	Not recommended	No radiation and/or cancer-directed surgery	None/Unknown	Yes	0	950	0	40	Distant	Single (never married)	481	1705	1757	6282	402	415	3170	14	Dead	Active follow-up	Dead (attributable to this cancer dx)	Alive or dead due to cancer
6	White	Female	C40.2-Long bones of lower limb and associated joints	Unknown	Positive histology	9260/3: Ewing sarcoma	T1	N0	M0	None; diagnosed at autopsy	Surgery performed	No radiation and/or cancer-directed surgery	None/Unknown	Yes	68	400	0	0	Regional	Single (never married)	296	1073	3821	7554	379	367	4517	42	Alive	Active follow-up	N/A not first tumor	N/A not first tumor
49	White	Male	C49.3-Conn, subcutaneous, other soft tis: thorax	Unknown	Positive histology	9260/3: Ewing sarcoma	T1b	N0	M0	None; diagnosed at autopsy	Surgery performed	Radiation after surgery	Beam radiation	Yes	30	320	0	0	Localized	Married (including common law)	615	2302	1722	4881	1269	850	2931	47	Dead	Active follow-up	Dead (attributable to this cancer dx)	Alive or dead due to cancer
14	White	Female	C40.2-Long bones of lower limb and associated joints	Well differentiated; Grade I	Positive histology	9261/3: Adamantinoma of long bones	TX	N0	M0	None; diagnosed at autopsy	Surgery performed	No radiation and/or cancer-directed surgery	None/Unknown	No/Unknown	999	300	0	0	Localized	Single (never married)	481	1705	1757	6282	402	415	3170	117	Alive	Active follow-up	Alive or dead of other cause	Alive or dead due to cancer
36	Other (American Indian/AK Native, Asian/Pacific Islander)	Male	C72.1-Cauda equina	Undifferentiated; anaplastic; Grade IV	Positive histology	9260/3: Ewing sarcoma	NA	NA	NA	None; diagnosed at autopsy	Surgery performed	Radiation after surgery	Beam radiation	Yes	999	300	988	99	Unstaged	Married (including common law)	615	2302	1722	4881	1269	850	2931	95	Alive	Active follow-up	Alive or dead of other cause	Alive or dead due to cancer
18	White	Male	C40.2-Long bones of lower limb and associated joints	Undifferentiated; anaplastic; Grade IV	Positive histology	9260/3: Ewing sarcoma	TX	N0	M0	None; diagnosed at autopsy	Surgery performed	No radiation and/or cancer-directed surgery	None/Unknown	Yes	999	100	0	0	Localized	Single (never married)	296	1073	3821	7554	379	367	4517	85	Alive	Active follow-up	Alive or dead of other cause	Alive or dead due to cancer
11	White	Male	C38.4-Pleura, NOS	Unknown	Positive histology	9260/3: Ewing sarcoma	NA	NA	NA	None; diagnosed at autopsy	Not recommended	No radiation and/or cancer-directed surgery	None/Unknown	Yes	999	160	0	0	Unstaged	Single (never married)	296	1073	3821	7554	379	367	4517	3	Dead	Active follow-up	Dead (attributable to this cancer dx)	Alive or dead due to cancer
49	White	Male	C40.0-Long bones: upper limb, scapula, and associated joints	Unknown	Positive histology	9260/3: Ewing sarcoma	TX	NX	MX	None; diagnosed at autopsy	Not recommended	No radiation and/or cancer-directed surgery	Beam radiation	Yes	999	999	999	99	Unstaged	Married (including common law)	615	2302	1722	4881	1269	850	2931	40	Dead	Active follow-up	Dead (attributable to this cancer dx)	Alive or dead due to cancer
17	Black	Male	C40.2-Long bones of lower limb and associated joints	Unknown	Positive histology	9260/3: Ewing sarcoma	TX	N0	M0	None; diagnosed at autopsy	Not recommended	No radiation and/or cancer-directed surgery	None/Unknown	Yes	58	999	0	0	Unstaged	Single (never married)	615	2302	1722	4881	1269	850	2931	88	Alive	Active follow-up	Alive or dead of other cause	Alive or dead due to cancer
17	White	Male	C40.2-Long bones of lower limb and associated joints	Undifferentiated; anaplastic; Grade IV	Positive histology	9260/3: Ewing sarcoma	TX	N0	M0	None; diagnosed at autopsy	Recommended but not performed, unknown reason	No radiation and/or cancer-directed surgery	None/Unknown	No/Unknown	999	100	0	0	Localized	Single (never married)	615	2302	1722	4881	1269	850	2931	0	Dead	Active follow-up	Alive or dead of other cause	Dead (attributable to causes other than this cancer dx)
16	White	Female	C49.2-Conn, subcutaneous, other soft tis: lower limb, hip	Unknown	Positive histology	9260/3: Ewing sarcoma	T1a	N0	M0	None; diagnosed at autopsy	Surgery performed	No radiation and/or cancer-directed surgery	None/Unknown	Yes	10	110	0	0	Localized	Single (never married)	296	1073	3821	7554	379	367	4517	90	Alive	Active follow-up	Alive or dead of other cause	Alive or dead due to cancer
8	White	Male	C49.2-Conn, subcutaneous, other soft tis: lower limb, hip	Unknown	Positive histology	9260/3: Ewing sarcoma	T1b	N0	M0	None; diagnosed at autopsy	Surgery performed	Radiation after surgery	Beam radiation	Yes	25	120	0	0	Localized	Single (never married)	296	1073	3821	7554	379	367	4517	80	Alive	Active follow-up	Alive or dead of other cause	Alive or dead due to cancer
46	White	Male	C41.9-Bone, NOS	Unknown	Positive histology	9260/3: Ewing sarcoma	T0	N1	M1b	None; diagnosed at autopsy	Not recommended	No radiation and/or cancer-directed surgery	None/Unknown	Yes	0	950	100	40	Distant	Divorced	296	1073	3821	7554	379	367	4517	29	Dead	Active follow-up	Dead (attributable to this cancer dx)	Alive or dead due to cancer
0	Black	Male	C49.6-Conn, subcutaneous, other soft tis: trunk, NOS	Unknown	Positive histology	9260/3: Ewing sarcoma	T2b	N0	M0	None; diagnosed at autopsy	Surgery performed	No radiation and/or cancer-directed surgery	None/Unknown	Yes	145	420	0	0	Regional	Single (never married)	615	2302	1722	4881	1269	850	2931	67	Alive	Active follow-up	Alive or dead of other cause	Alive or dead due to cancer
35	White	Male	C48.0-Retroperitoneum	Undifferentiated; anaplastic; Grade IV	Positive histology	9260/3: Ewing sarcoma	T1b	N0	M0	None; diagnosed at autopsy	Surgery performed	No radiation and/or cancer-directed surgery	None/Unknown	Yes	35	800	0	0	Distant	Married (including common law)	615	2302	1722	4881	1269	850	2931	19	Dead	Active follow-up	Dead (attributable to this cancer dx)	Alive or dead due to cancer
10	White	Male	C41.2-Vertebral column	Unknown	Positive histology	9260/3: Ewing sarcoma	T2	N0	M0	None; diagnosed at autopsy	Surgery performed	Radiation after surgery	Beam radiation	Yes	159	400	0	0	Regional	Single (never married)	615	2302	1722	4881	1269	850	2931	82	Alive	Active follow-up	Alive or dead of other cause	Alive or dead due to cancer
21	White	Male	C41.4-Pelvic bones, sacrum, coccyx and associated joints	Unknown	Positive histology	9260/3: Ewing sarcoma	T2	N0	M0	None; diagnosed at autopsy	Recommended but not performed, unknown reason	No radiation and/or cancer-directed surgery	Beam radiation	Yes	103	400	0	0	Regional	Married (including common law)	615	2302	1722	4881	1269	850	2931	17	Dead	Active follow-up	Dead (attributable to this cancer dx)	Alive or dead due to cancer
9	White	Female	C49.2-Conn, subcutaneous, other soft tis: lower limb, hip	Unknown	Positive histology	9260/3: Ewing sarcoma	T2NOS	N0	M0	None; diagnosed at autopsy	Surgery performed	Radiation after surgery	Beam radiation	Yes	94	400	0	0	Regional	Single (never married)	296	1073	3821	7554	379	367	4517	65	Alive	Active follow-up	Alive or dead of other cause	Alive or dead due to cancer
15	White	Male	C40.2-Long bones of lower limb and associated joints	Unknown	Positive histology	9260/3: Ewing sarcoma	TX	N0	M0	None; diagnosed at autopsy	Surgery performed	No radiation and/or cancer-directed surgery	None/Unknown	Yes	999	999	0	0	Unstaged	Single (never married)	296	1073	3821	7554	379	367	4517	62	Alive	Active follow-up	Alive or dead of other cause	Alive or dead due to cancer
19	White	Male	C41.3-Rib, sternum, clavicle and associated joints	Undifferentiated; anaplastic; Grade IV	Positive histology	9260/3: Ewing sarcoma	TX	N1	M1a	Any combo of sur proc to oth rg, dis lym nd, and/or dis site	Surgery performed	Radiation prior to surgery	Beam radiation	Yes	999	600	100	30	Distant	Single (never married)	481	1705	1757	6282	402	415	3170	38	Dead	Active follow-up	Dead (attributable to this cancer dx)	Alive or dead due to cancer
17	White	Male	C41.4-Pelvic bones, sacrum, coccyx and associated joints	Unknown	Positive histology	9260/3: Ewing sarcoma	T2	N0	M0	None; diagnosed at autopsy	Surgery performed	No radiation and/or cancer-directed surgery	None/Unknown	Yes	108	400	0	0	Regional	Single (never married)	615	2302	1722	4881	1269	850	2931	37	Dead	Active follow-up	Dead (attributable to this cancer dx)	Alive or dead due to cancer
13	White	Male	C49.2-Conn, subcutaneous, other soft tis: lower limb, hip	Unknown	Positive histology	9260/3: Ewing sarcoma	T1b	N0	M0	None; diagnosed at autopsy	Surgery performed	No radiation and/or cancer-directed surgery	None/Unknown	Yes	35	120	0	0	Localized	Single (never married)	296	1073	3821	7554	379	367	4517	65	Alive	Active follow-up	Alive or dead of other cause	Alive or dead due to cancer
13	White	Male	C40.2-Long bones of lower limb and associated joints	Unknown	Positive histology	9261/3: Adamantinoma of long bones	T1	N0	M0	None; diagnosed at autopsy	Surgery performed	No radiation and/or cancer-directed surgery	None/Unknown	No/Unknown	15	300	0	0	Localized	Single (never married)	296	1073	3821	7554	379	367	4517	67	Alive	Active follow-up	Alive or dead of other cause	Alive or dead due to cancer
19	White	Male	C41.4-Pelvic bones, sacrum, coccyx and associated joints	Unknown	Positive histology	9260/3: Ewing sarcoma	T2	N0	M0	None; diagnosed at autopsy	Surgery performed	Radiation after surgery	Beam radiation	Yes	180	400	0	0	Regional	Single (never married)	615	2302	1722	4881	1269	850	2931	25	Dead	Active follow-up	Dead (attributable to this cancer dx)	Alive or dead due to cancer
18	White	Male	C41.1-Mandible	Unknown	Positive histology	9260/3: Ewing sarcoma	TX	N0	M0	None; diagnosed at autopsy	Surgery performed	Radiation after surgery	Beam radiation	Yes	999	999	0	0	Unstaged	Single (never married)	481	1705	1757	6282	402	415	3170	66	Alive	Active follow-up	Alive or dead of other cause	Alive or dead due to cancer
20	White	Male	C49.2-Conn, subcutaneous, other soft tis: lower limb, hip	Undifferentiated; anaplastic; Grade IV	Positive histology	9260/3: Ewing sarcoma	T2b	N0	M0	None; diagnosed at autopsy	Surgery performed	No radiation and/or cancer-directed surgery	None/Unknown	Yes	130	600	0	0	Regional	Single (never married)	615	2302	1722	4881	1269	850	2931	23	Alive	Active follow-up	Alive or dead of other cause	Alive or dead due to cancer
17	White	Male	C41.3-Rib, sternum, clavicle and associated joints	Undifferentiated; anaplastic; Grade IV	Positive histology	9260/3: Ewing sarcoma	T1	N0	M0	None; diagnosed at autopsy	Surgery performed	Radiation after surgery	Beam radiation	Yes	60	400	0	0	Regional	Single (never married)	296	1073	3821	7554	379	367	4517	52	Dead	Active follow-up	Dead (attributable to this cancer dx)	Alive or dead due to cancer
68	Black	Male	C38.1-Anterior mediastinum	Undifferentiated; anaplastic; Grade IV	Positive histology	9260/3: Ewing sarcoma	T1b	N0	M0	None; diagnosed at autopsy	Recommended but not performed, unknown reason	No radiation and/or cancer-directed surgery	Beam radiation	Yes	10	600	0	0	Blank(s)	Married (including common law)	615	2302	1722	4881	1269	850	2931	14	Dead	Active follow-up	Dead (attributable to this cancer dx)	Alive or dead due to cancer
21	White	Female	C41.0-Bones of skull and face and associated joints	Undifferentiated; anaplastic; Grade IV	Positive histology	9260/3: Ewing sarcoma	T1	N0	M1b	None; diagnosed at autopsy	Surgery performed	Radiation after surgery	Beam radiation	Yes	50	400	0	35	Distant	Single (never married)	296	1073	3821	7554	379	367	4517	53	Alive	Active follow-up	Alive or dead of other cause	Alive or dead due to cancer
22	White	Female	C64.9-Kidney, NOS	Unknown	Positive histology	9260/3: Ewing sarcoma	NA	NA	NA	None; diagnosed at autopsy	Surgery performed	No radiation and/or cancer-directed surgery	None/Unknown	Yes	150	300	0	0	Localized	Single (never married)	481	1705	1757	6282	402	415	3170	62	Alive	Active follow-up	Alive or dead of other cause	Alive or dead due to cancer
38	Black	Female	C40.0-Long bones: upper limb, scapula, and associated joints	Unknown	Positive histology	9260/3: Ewing sarcoma	T2	N0	M1NOS	None; diagnosed at autopsy	Recommended but not performed, unknown reason	No radiation and/or cancer-directed surgery	Beam radiation	Yes	90	300	0	60	Distant	Single (never married)	615	2302	1722	4881	1269	850	2931	11	Dead	Active follow-up	Dead (attributable to this cancer dx)	Alive or dead due to cancer
31	White	Female	C41.4-Pelvic bones, sacrum, coccyx and associated joints	Unknown	Positive histology	9260/3: Ewing sarcoma	TX	N0	M1NOS	None; diagnosed at autopsy	Recommended but not performed, unknown reason	No radiation and/or cancer-directed surgery	None/Unknown	Yes	999	100	0	60	Distant	Single (never married)	296	1073	3821	7554	379	367	4517	11	Dead	Active follow-up	Dead (attributable to this cancer dx)	Alive or dead due to cancer
38	White	Female	C49.0-Conn, subcutaneous, other soft tis: head, face, neck	Unknown	Positive histology	9260/3: Ewing sarcoma	T1b	N0	M0	None; diagnosed at autopsy	Surgery performed	Radiation after surgery	Beam radiation	Yes	22	620	0	0	Regional	Married (including common law)	615	2302	1722	4881	1269	850	2931	54	Alive	Active follow-up	Alive or dead of other cause	Alive or dead due to cancer
11	White	Male	C41.3-Rib, sternum, clavicle and associated joints	Unknown	Positive histology	9260/3: Ewing sarcoma	T1	N0	M0	None; diagnosed at autopsy	Surgery performed	No radiation and/or cancer-directed surgery	None/Unknown	Yes	38	400	0	0	Regional	Single (never married)	615	2302	1722	4881	1269	850	2931	56	Alive	Active follow-up	Alive or dead of other cause	Alive or dead due to cancer
15	Black	Male	C41.0-Bones of skull and face and associated joints	Unknown	Positive histology	9260/3: Ewing sarcoma	T1	N0	M0	None; diagnosed at autopsy	Surgery performed	Radiation after surgery	Beam radiation	Yes	35	400	0	0	Regional	Single (never married)	481	1705	1757	6282	402	415	3170	59	Alive	Active follow-up	Alive or dead of other cause	Alive or dead due to cancer
23	White	Male	C40.0-Long bones: upper limb, scapula, and associated joints	Unknown	Positive histology	9260/3: Ewing sarcoma	T1	N0	M0	None; diagnosed at autopsy	Not recommended	No radiation and/or cancer-directed surgery	None/Unknown	Yes	60	300	0	0	Localized	Single (never married)	615	2302	1722	4881	1269	850	2931	9	Dead	Active follow-up	Dead (attributable to this cancer dx)	Alive or dead due to cancer
26	White	Female	C41.4-Pelvic bones, sacrum, coccyx and associated joints	Unknown	Positive microscopic confirm, method not specified	9260/3: Ewing sarcoma	TX	N0	M1b	None; diagnosed at autopsy	Recommended but not performed, unknown reason	No radiation and/or cancer-directed surgery	Beam radiation	Yes	25	999	0	40	Distant	Married (including common law)	481	1705	1757	6282	402	415	3170	12	Dead	Active follow-up	Dead (attributable to this cancer dx)	Alive or dead due to cancer
20	White	Female	C41.2-Vertebral column	Unknown	Positive histology	9260/3: Ewing sarcoma	T2	N0	M0	None; diagnosed at autopsy	Surgery performed	Radiation after surgery	Beam radiation	Yes	110	600	0	0	Regional	Single (never married)	615	2302	1722	4881	1269	850	2931	30	Dead	Active follow-up	Dead (attributable to this cancer dx)	Alive or dead due to cancer
12	White	Male	C41.3-Rib, sternum, clavicle and associated joints	Unknown	Positive histology	9260/3: Ewing sarcoma	T2	N0	M0	None; diagnosed at autopsy	Surgery performed	Radiation after surgery	Beam radiation	Yes	107	400	0	0	Regional	Single (never married)	296	1073	3821	7554	379	367	4517	39	Alive	Active follow-up	Alive or dead of other cause	Alive or dead due to cancer
14	White	Female	C49.0-Conn, subcutaneous, other soft tis: head, face, neck	Unknown	Positive histology	9260/3: Ewing sarcoma	T1a	N0	M0	None; diagnosed at autopsy	Surgery performed	Radiation after surgery	Beam radiation	Yes	30	110	0	0	Localized	Single (never married)	296	1073	3821	7554	379	367	4517	37	Alive	Active follow-up	Alive or dead of other cause	Alive or dead due to cancer
11	White	Male	C40.2-Long bones of lower limb and associated joints	Unknown	Positive histology	9260/3: Ewing sarcoma	T2	N0	M0	None; diagnosed at autopsy	Surgery performed	Radiation after surgery	Beam radiation	Yes	120	600	0	0	Regional	Single (never married)	481	1705	1757	6282	402	415	3170	36	Alive	Active follow-up	Alive or dead of other cause	Alive or dead due to cancer
41	Other (American Indian/AK Native, Asian/Pacific Islander)	Male	C49.3-Conn, subcutaneous, other soft tis: thorax	Undifferentiated; anaplastic; Grade IV	Positive histology	9260/3: Ewing sarcoma	T2b	N0	M0	None; diagnosed at autopsy	Surgery performed	No radiation and/or cancer-directed surgery	None/Unknown	Yes	74	120	0	0	Localized	Married (including common law)	296	1073	3821	7554	379	367	4517	40	Alive	Active follow-up	Alive or dead of other cause	Alive or dead due to cancer
52	White	Female	C41.4-Pelvic bones, sacrum, coccyx and associated joints	Unknown	Positive histology	9260/3: Ewing sarcoma	TX	N0	M1b	None; diagnosed at autopsy	Not recommended	No radiation and/or cancer-directed surgery	None/Unknown	Yes	999	400	0	50	Distant	Single (never married)	481	1705	1757	6282	402	415	3170	5	Dead	Active follow-up	Dead (attributable to this cancer dx)	Alive or dead due to cancer
18	White	Male	C49.6-Conn, subcutaneous, other soft tis: trunk, NOS	Unknown	Positive histology	9260/3: Ewing sarcoma	T2b	N0	M0	None; diagnosed at autopsy	Surgery performed	Radiation after surgery	Beam radiation	Yes	120	320	0	0	Localized	Single (never married)	481	1705	1757	6282	402	415	3170	40	Alive	Active follow-up	Alive or dead of other cause	Alive or dead due to cancer
10	White	Female	C49.2-Conn, subcutaneous, other soft tis: lower limb, hip	Unknown	Positive histology	9260/3: Ewing sarcoma	T1b	N0	M1	None; diagnosed at autopsy	Surgery performed	Radiation after surgery	Beam radiation	Yes	30	320	0	10	Distant	Single (never married)	481	1705	1757	6282	402	415	3170	34	Alive	Active follow-up	Alive or dead of other cause	Alive or dead due to cancer
31	White	Male	C48.1-Specified parts of peritoneum	Unknown	Positive histology	9260/3: Ewing sarcoma	T2b	N1	M1	None; diagnosed at autopsy	Not recommended	No radiation and/or cancer-directed surgery	None/Unknown	Yes	158	600	800	50	Distant	Unknown	615	2302	1722	4881	1269	850	2931	27	Alive	Active follow-up	Alive or dead of other cause	Alive or dead due to cancer
22	White	Female	C41.3-Rib, sternum, clavicle and associated joints	Unknown	Positive histology	9260/3: Ewing sarcoma	T2	N1	M0	None; diagnosed at autopsy	Surgery performed	Radiation after surgery	Beam radiation	Yes	230	400	300	0	Regional	Single (never married)	615	2302	1722	4881	1269	850	2931	32	Alive	Active follow-up	Alive or dead of other cause	Alive or dead due to cancer
18	White	Male	C41.4-Pelvic bones, sacrum, coccyx and associated joints	Unknown	Positive histology	9260/3: Ewing sarcoma	T2	N1	M1a	None; diagnosed at autopsy	Not recommended	No radiation and/or cancer-directed surgery	None/Unknown	Yes	111	400	100	30	Distant	Single (never married)	615	2302	1722	4881	1269	850	2931	23	Alive	Active follow-up	Alive or dead of other cause	Alive or dead due to cancer
12	White	Female	C40.2-Long bones of lower limb and associated joints	Unknown	Positive histology	9260/3: Ewing sarcoma	T2	N0	M0	None; diagnosed at autopsy	Surgery performed	Radiation after surgery	Beam radiation	Yes	110	400	0	0	Regional	Single (never married)	296	1073	3821	7554	379	367	4517	18	Dead	Active follow-up	Dead (attributable to this cancer dx)	Alive or dead due to cancer
15	White	Female	C41.3-Rib, sternum, clavicle and associated joints	Unknown	Positive histology	9260/3: Ewing sarcoma	T2	N0	M0	None; diagnosed at autopsy	Surgery performed	Radiation after surgery	Beam radiation	Yes	117	400	0	0	Regional	Single (never married)	615	2302	1722	4881	1269	850	2931	19	Alive	Active follow-up	Alive or dead of other cause	Alive or dead due to cancer
16	Black	Male	C49.1-Conn, subcutaneous, other soft tis: upr limb, shoulder	Unknown	Positive histology	9260/3: Ewing sarcoma	TX	N0	M1	None; diagnosed at autopsy	Not recommended	No radiation and/or cancer-directed surgery	None/Unknown	Yes	999	110	0	40	Distant	Single (never married)	615	2302	1722	4881	1269	850	2931	12	Dead	Active follow-up	Dead (attributable to this cancer dx)	Alive or dead due to cancer
52	White	Female	C40.1-Short bones of upper limb and associated joints	Unknown	Positive histology	9260/3: Ewing sarcoma	T1	N0	M0	None; diagnosed at autopsy	Surgery performed	Radiation after surgery	Beam radiation	Yes	30	400	0	0	Regional	Married (including common law)	481	1705	1757	6282	402	415	3170	21	Alive	Active follow-up	Alive or dead of other cause	Alive or dead due to cancer
23	White	Male	C40.0-Long bones: upper limb, scapula, and associated joints	Poorly differentiated; Grade III	Positive histology	9260/3: Ewing sarcoma	T2	N0	M0	None; diagnosed at autopsy	Surgery performed	No radiation and/or cancer-directed surgery	None/Unknown	Yes	81	300	0	0	Localized	Single (never married)	615	2302	1722	4881	1269	850	2931	14	Alive	Active follow-up	Alive or dead of other cause	Alive or dead due to cancer
13	White	Female	C41.3-Rib, sternum, clavicle and associated joints	Unknown	Positive histology	9260/3: Ewing sarcoma	T2	N0	M0	None; diagnosed at autopsy	Surgery performed	No radiation and/or cancer-directed surgery	None/Unknown	Yes	92	600	0	0	Regional	Single (never married)	481	1705	1757	6282	402	415	3170	19	Alive	Active follow-up	Alive or dead of other cause	Alive or dead due to cancer
23	White	Male	C41.4-Pelvic bones, sacrum, coccyx and associated joints	Unknown	Positive histology	9260/3: Ewing sarcoma	T2	N0	M1b	None; diagnosed at autopsy	Not recommended	No radiation and/or cancer-directed surgery	Beam radiation	Yes	110	400	0	40	Distant	Single (never married)	481	1705	1757	6282	402	415	3170	13	Alive	Active follow-up	Alive or dead of other cause	Alive or dead due to cancer
4	Black	Male	C40.2-Long bones of lower limb and associated joints	Unknown	Positive histology	9260/3: Ewing sarcoma	T1	N0	M0	None; diagnosed at autopsy	Surgery performed	No radiation and/or cancer-directed surgery	None/Unknown	Yes	71	200	0	0	Localized	Single (never married)	615	2302	1722	4881	1269	850	2931	9	Alive	Active follow-up	Alive or dead of other cause	Alive or dead due to cancer
20	White	Male	C40.2-Long bones of lower limb and associated joints	Unknown	Positive histology	9260/3: Ewing sarcoma	T2	N0	M1NOS	None; diagnosed at autopsy	Surgery performed	Radiation after surgery	Beam radiation	Yes	100	400	0	60	Distant	Single (never married)	296	1073	3821	7554	379	367	4517	11	Alive	Active follow-up	Alive or dead of other cause	Alive or dead due to cancer
55	White	Female	C40.1-Short bones of upper limb and associated joints	Unknown	Positive histology	9260/3: Ewing sarcoma	T1	N0	M0	None; diagnosed at autopsy	Surgery performed	No radiation and/or cancer-directed surgery	None/Unknown	Yes	5	310	0	0	Localized	Divorced	615	2302	1722	4881	1269	850	2931	8	Alive	Active follow-up	Alive or dead of other cause	Alive or dead due to cancer
18	White	Female	C49.3-Conn, subcutaneous, other soft tis: thorax	Unknown	Positive histology	9260/3: Ewing sarcoma	T2b	N0	M0	None; diagnosed at autopsy	Surgery performed	Radiation after surgery	Beam radiation	Yes	58	120	0	0	Localized	Single (never married)	296	1073	3821	7554	379	367	4517	5	Alive	Active follow-up	Alive or dead of other cause	Alive or dead due to cancer
7	White	Male	C40.0-Long bones: upper limb, scapula, and associated joints	Unknown	Positive histology	9260/3: Ewing sarcoma	T2	N0	M0	None; diagnosed at autopsy	Surgery performed	No radiation and/or cancer-directed surgery	None/Unknown	Yes	90	600	0	0	Regional	Single (never married)	481	1705	1757	6282	402	415	3170	5	Alive	Active follow-up	Alive or dead of other cause	Alive or dead due to cancer
34	White	Male	C40.2-Long bones of lower limb and associated joints	Unknown	Positive histology	9260/3: Ewing sarcoma	T1	N0	M0	None; diagnosed at autopsy	Surgery performed	No radiation and/or cancer-directed surgery	None/Unknown	Yes	60	100	0	0	Localized	Married (including common law)	481	1705	1757	6282	402	415	3170	3	Alive	Active follow-up	Alive or dead of other cause	Alive or dead due to cancer
23	White	Male	C40.2-Long bones of lower limb and associated joints	Unknown	Positive histology	9260/3: Ewing sarcoma	T2	N0	M0	None; diagnosed at autopsy	Surgery performed	Radiation prior to surgery	Beam radiation	Yes	950	400	0	0	Regional	Single (never married)	615	2302	1722	4881	1269	850	2931	7	Alive	Active follow-up	Alive or dead of other cause	Alive or dead due to cancer
3	White	Male	C41.3-Rib, sternum, clavicle and associated joints	Unknown	Positive histology	9260/3: Ewing sarcoma	T1	N1	M0	Non-primary surgical procedure to other regional sites	Surgery performed	Radiation after surgery	Beam radiation	Yes	77	310	100	0	Regional	Single (never married)	481	1705	1757	6282	402	415	3170	4	Alive	Active follow-up	Alive or dead of other cause	Alive or dead due to cancer
6	White	Male	C41.4-Pelvic bones, sacrum, coccyx and associated joints	Unknown	Positive histology	9260/3: Ewing sarcoma	T1	N0	M0	None; diagnosed at autopsy	Surgery performed	No radiation and/or cancer-directed surgery	None/Unknown	Yes	67	300	0	0	Localized	Single (never married)	615	2302	1722	4881	1269	850	2931	4	Alive	Active follow-up	Alive or dead of other cause	Alive or dead due to cancer
29	Other (American Indian/AK Native, Asian/Pacific Islander)	Female	C41.4-Pelvic bones, sacrum, coccyx and associated joints	Undifferentiated; anaplastic; Grade IV	Positive histology	9260/3: Ewing sarcoma	TX	NX	MX	None; diagnosed at autopsy	Not recommended	No radiation and/or cancer-directed surgery	Beam radiation	Yes	999	999	999	99	Unstaged	Single (never married)	726	1515	2787	6012	699	624	3515	18	Dead	Active follow-up	Dead (attributable to this cancer dx)	Alive or dead due to cancer
22	Other (American Indian/AK Native, Asian/Pacific Islander)	Male	C40.2-Long bones of lower limb and associated joints	Unknown	Positive histology	9261/3: Adamantinoma of long bones	T1	N0	M0	None; diagnosed at autopsy	Surgery performed	No radiation and/or cancer-directed surgery	None/Unknown	No/Unknown	50	100	0	0	Localized	Single (never married)	726	1515	2787	6012	699	624	3515	101	Alive	Active follow-up	Alive or dead of other cause	Alive or dead due to cancer
15	Other (American Indian/AK Native, Asian/Pacific Islander)	Male	C40.2-Long bones of lower limb and associated joints	Moderately differentiated; Grade II	Positive histology	9261/3: Adamantinoma of long bones	T1	N0	M0	None; diagnosed at autopsy	Surgery performed	No radiation and/or cancer-directed surgery	None/Unknown	No/Unknown	72	400	0	0	Regional	Single (never married)	726	1515	2787	6012	699	624	3515	98	Alive	Active follow-up	Alive or dead of other cause	Alive or dead due to cancer
34	Other (American Indian/AK Native, Asian/Pacific Islander)	Male	C49.0-Conn, subcutaneous, other soft tis: head, face, neck	Unknown	Positive histology	9260/3: Ewing sarcoma	T1b	N0	M0	None; diagnosed at autopsy	Surgery performed	Radiation after surgery	Beam radiation	Yes	36	620	0	0	Regional	Single (never married)	726	1515	2787	6012	699	624	3515	97	Alive	Active follow-up	Alive or dead of other cause	Alive or dead due to cancer
5	White	Female	C41.4-Pelvic bones, sacrum, coccyx and associated joints	Unknown	Positive histology	9260/3: Ewing sarcoma	T3	NX	M1b	None; diagnosed at autopsy	Surgery performed	No radiation and/or cancer-directed surgery	None/Unknown	Yes	61	820	999	40	Distant	Single (never married)	754	1661	2243	5528	768	496	2737	36	Dead	Active follow-up	Dead (attributable to this cancer dx)	Alive or dead due to cancer
16	Other (American Indian/AK Native, Asian/Pacific Islander)	Male	C41.3-Rib, sternum, clavicle and associated joints	Unknown	Positive histology	9260/3: Ewing sarcoma	T1	N1	M0	None; diagnosed at autopsy	Surgery performed	No radiation and/or cancer-directed surgery	None/Unknown	Yes	18	400	100	0	Regional	Single (never married)	754	1661	2243	5528	768	496	2737	82	Alive	Active follow-up	Alive or dead of other cause	Alive or dead due to cancer
18	Other (American Indian/AK Native, Asian/Pacific Islander)	Male	C40.2-Long bones of lower limb and associated joints	Unknown	Positive histology	9260/3: Ewing sarcoma	TX	N0	M1b	None; diagnosed at autopsy	Not recommended	No radiation and/or cancer-directed surgery	Beam radiation	Yes	999	999	0	40	Distant	Single (never married)	593	1544	2210	4648	1102	795	3159	4	Dead	Active follow-up	Dead (attributable to this cancer dx)	Alive or dead due to cancer
52	White	Female	C49.1-Conn, subcutaneous, other soft tis: upr limb, shoulder	Undifferentiated; anaplastic; Grade IV	Positive histology	9260/3: Ewing sarcoma	TX	N0	M1	None; diagnosed at autopsy	Not recommended	No radiation and/or cancer-directed surgery	Beam radiation	Yes	999	620	0	40	Distant	Separated	726	1515	2787	6012	699	624	3515	13	Dead	Active follow-up	Dead (attributable to this cancer dx)	Alive or dead due to cancer
6	Other (American Indian/AK Native, Asian/Pacific Islander)	Female	C40.2-Long bones of lower limb and associated joints	Unknown	Positive histology	9260/3: Ewing sarcoma	T1	N0	M0	None; diagnosed at autopsy	Surgery performed	No radiation and/or cancer-directed surgery	None/Unknown	Yes	990	200	0	0	Localized	Single (never married)	726	1515	2787	6012	699	624	3515	51	Alive	Active follow-up	Alive or dead of other cause	Alive or dead due to cancer
64	White	Male	C49.1-Conn, subcutaneous, other soft tis: upr limb, shoulder	Unknown	Positive histology	9260/3: Ewing sarcoma	T1NOS	N0	M0	None; diagnosed at autopsy	Surgery performed	No radiation and/or cancer-directed surgery	None/Unknown	Yes	8	300	0	0	Localized	Married (including common law)	726	1515	2787	6012	699	624	3515	40	Alive	Active follow-up	Alive or dead of other cause	Alive or dead due to cancer
59	White	Male	C49.5-Conn, subcutaneous, other soft tis: pelvis	Poorly differentiated; Grade III	Positive histology	9260/3: Ewing sarcoma	T2b	N0	M1	None; diagnosed at autopsy	Not recommended	No radiation and/or cancer-directed surgery	Beam radiation	No/Unknown	68	320	0	40	Distant	Divorced	754	1661	2243	5528	768	496	2737	2	Dead	Active follow-up	Dead (attributable to this cancer dx)	Alive or dead due to cancer
18	Other (American Indian/AK Native, Asian/Pacific Islander)	Male	C40.2-Long bones of lower limb and associated joints	Unknown	Positive histology	9260/3: Ewing sarcoma	T3	N0	M1a	None; diagnosed at autopsy	Not recommended	No radiation and/or cancer-directed surgery	Beam radiation	Yes	240	820	0	30	Distant	Single (never married)	593	1544	2210	4648	1102	795	3159	28	Dead	Active follow-up	Dead (attributable to this cancer dx)	Alive or dead due to cancer
38	Other (American Indian/AK Native, Asian/Pacific Islander)	Female	C40.3-Short bones of lower limb and associated joints	Unknown	Positive histology	9260/3: Ewing sarcoma	T1	N1	M1a	None; diagnosed at autopsy	Surgery performed	No radiation and/or cancer-directed surgery	None/Unknown	Yes	48	200	100	30	Distant	Married (including common law)	726	1515	2787	6012	699	624	3515	22	Alive	Active follow-up	Alive or dead of other cause	Alive or dead due to cancer
5	Other (American Indian/AK Native, Asian/Pacific Islander)	Male	C40.2-Long bones of lower limb and associated joints	Well differentiated; Grade I	Positive histology	9261/3: Adamantinoma of long bones	T1	N0	M0	None; diagnosed at autopsy	Surgery performed	No radiation and/or cancer-directed surgery	None/Unknown	No/Unknown	63	100	0	0	Localized	Single (never married)	726	1515	2787	6012	699	624	3515	18	Alive	Active follow-up	Alive or dead of other cause	Alive or dead due to cancer
11	White	Male	C41.4-Pelvic bones, sacrum, coccyx and associated joints	Unknown	Positive histology	9260/3: Ewing sarcoma	T2	N1	M0	None; diagnosed at autopsy	Not recommended	No radiation and/or cancer-directed surgery	None/Unknown	Yes	187	600	100	0	Regional	Single (never married)	726	1515	2787	6012	699	624	3515	26	Alive	Active follow-up	Alive or dead of other cause	Alive or dead due to cancer
8	Other (American Indian/AK Native, Asian/Pacific Islander)	Female	C40.3-Short bones of lower limb and associated joints	Unknown	Positive histology	9260/3: Ewing sarcoma	T1	N0	M1NOS	None; diagnosed at autopsy	Not recommended	No radiation and/or cancer-directed surgery	Beam radiation	Yes	35	300	0	60	Distant	Single (never married)	726	1515	2787	6012	699	624	3515	14	Alive	Active follow-up	Alive or dead of other cause	Alive or dead due to cancer
40	White	Male	C49.6-Conn, subcutaneous, other soft tis: trunk, NOS	Unknown	Positive histology	9260/3: Ewing sarcoma	T2b	N0	M0	None; diagnosed at autopsy	Surgery performed	No radiation and/or cancer-directed surgery	None/Unknown	Yes	160	600	0	0	Regional	Married (including common law)	363	1167	2972	5656	530	474	3677	3	Alive	Active follow-up	N/A not first tumor	N/A not first tumor
33	White	Female	C41.0-Bones of skull and face and associated joints	Unknown	Positive histology	9260/3: Ewing sarcoma	T1	N0	M0	None; diagnosed at autopsy	Not recommended	No radiation and/or cancer-directed surgery	None/Unknown	Yes	50	300	0	0	Localized	Married (including common law)	671	1546	1201	4003	638	486	3305	32	Alive	Active follow-up	N/A not first tumor	N/A not first tumor
26	White	Male	C40.0-Long bones: upper limb, scapula, and associated joints	Unknown	Positive histology	9260/3: Ewing sarcoma	T1	NX	M1a	None; diagnosed at autopsy	Surgery performed	Radiation after surgery	Beam radiation	Yes	35	400	999	30	Distant	Married (including common law)	402	1046	2677	5829	404	256	3656	23	Dead	Active follow-up	Dead (attributable to this cancer dx)	Alive or dead due to cancer
13	White	Female	C40.0-Long bones: upper limb, scapula, and associated joints	Unknown	Positive histology	9260/3: Ewing sarcoma	TX	N0	M0	None; diagnosed at autopsy	Surgery performed	No radiation and/or cancer-directed surgery	None/Unknown	Yes	999	400	0	0	Regional	Single (never married)	469	1266	1752	4577	434	253	3067	117	Alive	Active follow-up	Alive or dead of other cause	Alive or dead due to cancer
13	White	Female	C40.3-Short bones of lower limb and associated joints	Unknown	Positive histology	9260/3: Ewing sarcoma	T1	N0	M0	None; diagnosed at autopsy	Surgery performed	No radiation and/or cancer-directed surgery	None/Unknown	Yes	32	400	0	0	Regional	Single (never married)	435	1368	2487	5205	765	518	3226	118	Alive	Active follow-up	Alive or dead of other cause	Alive or dead due to cancer
5	White	Male	C40.0-Long bones: upper limb, scapula, and associated joints	Undifferentiated; anaplastic; Grade IV	Positive histology	9260/3: Ewing sarcoma	T1	N0	M0	None; diagnosed at autopsy	Surgery performed	No radiation and/or cancer-directed surgery	None/Unknown	Yes	50	400	0	0	Regional	Single (never married)	495	1596	1503	4711	641	410	2771	112	Alive	Active follow-up	Alive or dead of other cause	Alive or dead due to cancer
23	White	Male	C41.4-Pelvic bones, sacrum, coccyx and associated joints	Unknown	Positive histology	9260/3: Ewing sarcoma	T2	N0	M0	None; diagnosed at autopsy	Not recommended	No radiation and/or cancer-directed surgery	None/Unknown	Yes	120	600	0	0	Regional	Single (never married)	496	1219	1395	4970	464	289	2838	114	Alive	Active follow-up	Alive or dead of other cause	Alive or dead due to cancer
7	White	Male	C49.5-Conn, subcutaneous, other soft tis: pelvis	Unknown	Positive histology	9260/3: Ewing sarcoma	T1NOS	N0	M0	None; diagnosed at autopsy	Surgery performed	No radiation and/or cancer-directed surgery	None/Unknown	Yes	17	100	0	0	Localized	Single (never married)	495	1596	1503	4711	641	410	2771	107	Alive	Active follow-up	Alive or dead of other cause	Alive or dead due to cancer
12	White	Female	C41.4-Pelvic bones, sacrum, coccyx and associated joints	Unknown	Positive exfoliative cytology, no positive histology	9260/3: Ewing sarcoma	T2	N1	M1b	None; diagnosed at autopsy	Not recommended	No radiation and/or cancer-directed surgery	Beam radiation	Yes	121	300	100	40	Distant	Single (never married)	420	1100	1879	4935	453	260	2812	17	Dead	Active follow-up	Dead (attributable to this cancer dx)	Alive or dead due to cancer
14	White	Male	C41.4-Pelvic bones, sacrum, coccyx and associated joints	Unknown	Positive histology	9260/3: Ewing sarcoma	T2	N0	M1b	Non-primary surgical procedure to distant site	Not recommended	No radiation and/or cancer-directed surgery	None/Unknown	Yes	120	300	0	40	Distant	Single (never married)	629	1525	1379	3996	816	456	2975	10	Dead	Active follow-up	Dead (attributable to this cancer dx)	Alive or dead due to cancer
5	White	Male	C40.2-Long bones of lower limb and associated joints	Unknown	Positive histology	9260/3: Ewing sarcoma	T1	N0	M0	None; diagnosed at autopsy	Surgery performed	No radiation and/or cancer-directed surgery	None/Unknown	Yes	60	400	0	0	Regional	Single (never married)	224	997	2125	5634	373	348	3232	109	Alive	Active follow-up	Alive or dead of other cause	Alive or dead due to cancer
47	White	Female	C41.3-Rib, sternum, clavicle and associated joints	Unknown	Positive exfoliative cytology, no positive histology	9260/3: Ewing sarcoma	T2	N0	M1a	None; diagnosed at autopsy	Surgery performed	Radiation after surgery	Beam radiation	Yes	82	400	0	30	Distant	Married (including common law)	279	634	4760	6011	523	392	4405	57	Alive	Active follow-up	N/A not first tumor	N/A not first tumor
14	White	Female	C41.3-Rib, sternum, clavicle and associated joints	Unknown	Positive histology	9260/3: Ewing sarcoma	T1	N0	M0	Non-primary surgical procedure to other regional sites	Surgery performed	No radiation and/or cancer-directed surgery	None/Unknown	Yes	57	300	0	0	Localized	Single (never married)	495	1596	1503	4711	641	410	2771	113	Alive	Active follow-up	Alive or dead of other cause	Alive or dead due to cancer
32	White	Male	C41.9-Bone, NOS	Unknown	Positive histology	9260/3: Ewing sarcoma	T0	NX	M1b	None; diagnosed at autopsy	Not recommended	No radiation and/or cancer-directed surgery	None/Unknown	Yes	0	950	999	50	Distant	Married (including common law)	1000	1634	1597	4704	450	244	2856	3	Dead	Active follow-up	Dead (attributable to this cancer dx)	Alive or dead due to cancer
2	White	Female	C40.0-Long bones: upper limb, scapula, and associated joints	Unknown	Positive histology	9260/3: Ewing sarcoma	T1	N0	M0	None; diagnosed at autopsy	Surgery performed	No radiation and/or cancer-directed surgery	None/Unknown	Yes	73	400	0	0	Regional	Single (never married)	521	1641	1251	4266	705	579	2549	107	Alive	Active follow-up	Alive or dead of other cause	Alive or dead due to cancer
20	White	Male	C49.3-Conn, subcutaneous, other soft tis: thorax	Unknown	Positive histology	9260/3: Ewing sarcoma	T1a	N0	M0	None; diagnosed at autopsy	Surgery performed	No radiation and/or cancer-directed surgery	None/Unknown	No/Unknown	40	110	0	0	Localized	Single (never married)	363	1167	2972	5656	530	474	3677	102	Alive	Active follow-up	Alive or dead of other cause	Alive or dead due to cancer
18	White	Male	C41.2-Vertebral column	Unknown	Positive histology	9260/3: Ewing sarcoma	TX	N0	M0	None; diagnosed at autopsy	Surgery performed	Radiation after surgery	Beam radiation	Yes	999	800	0	0	Distant	Single (never married)	458	1201	1628	4277	628	376	2653	100	Alive	Active follow-up	Alive or dead of other cause	Alive or dead due to cancer
14	White	Male	C41.4-Pelvic bones, sacrum, coccyx and associated joints	Undifferentiated; anaplastic; Grade IV	Positive histology	9260/3: Ewing sarcoma	T3	NX	M1b	None; diagnosed at autopsy	Not recommended	No radiation and/or cancer-directed surgery	Beam radiation	Yes	999	820	999	40	Distant	Single (never married)	633	1432	1713	4189	548	443	3049	66	Dead	Active follow-up	Dead (attributable to this cancer dx)	Alive or dead due to cancer
42	White	Male	C41.2-Vertebral column	Unknown	Positive histology	9260/3: Ewing sarcoma	T1	N0	M0	None; diagnosed at autopsy	Surgery performed	Radiation after surgery	Beam radiation	Yes	20	100	0	0	Localized	Married (including common law)	495	1420	1595	4509	822	551	2603	97	Alive	Active follow-up	Alive or dead of other cause	Alive or dead due to cancer
2	White	Female	C40.1-Short bones of upper limb and associated joints	Unknown	Positive histology	9260/3: Ewing sarcoma	T1	N0	M0	None; diagnosed at autopsy	Surgery performed	No radiation and/or cancer-directed surgery	None/Unknown	Yes	18	100	0	0	Localized	Single (never married)	279	634	4760	6011	523	392	4405	92	Alive	Active follow-up	Alive or dead of other cause	Alive or dead due to cancer
21	White	Female	C49.5-Conn, subcutaneous, other soft tis: pelvis	Unknown	Positive histology	9260/3: Ewing sarcoma	T2b	N0	M0	None; diagnosed at autopsy	Not recommended	No radiation and/or cancer-directed surgery	Beam radiation	Yes	115	620	0	0	Regional	Single (never married)	892	1743	1277	4020	569	370	2876	49	Dead	Active follow-up	Dead (attributable to this cancer dx)	Alive or dead due to cancer
11	White	Female	C40.2-Long bones of lower limb and associated joints	Unknown	Positive exfoliative cytology, no positive histology	9260/3: Ewing sarcoma	T2	N0	M0	None; diagnosed at autopsy	Not recommended	No radiation and/or cancer-directed surgery	None/Unknown	Yes	130	400	0	0	Regional	Single (never married)	613	1366	1536	4651	532	348	3023	88	Alive	Active follow-up	Alive or dead of other cause	Alive or dead due to cancer
24	White	Male	C49.3-Conn, subcutaneous, other soft tis: thorax	Unknown	Positive histology	9260/3: Ewing sarcoma	T2b	N0	M0	None; diagnosed at autopsy	Surgery performed	No radiation and/or cancer-directed surgery	None/Unknown	Yes	60	600	0	0	Regional	Single (never married)	363	1167	2972	5656	530	474	3677	83	Alive	Active follow-up	Alive or dead of other cause	Alive or dead due to cancer
18	White	Male	C40.2-Long bones of lower limb and associated joints	Unknown	Positive histology	9260/3: Ewing sarcoma	T2	N0	M1b	None; diagnosed at autopsy	Not recommended	No radiation and/or cancer-directed surgery	None/Unknown	Yes	250	300	0	40	Distant	Single (never married)	695	1421	1544	4425	521	266	2913	83	Alive	Active follow-up	Alive or dead of other cause	Alive or dead due to cancer
15	White	Male	C49.6-Conn, subcutaneous, other soft tis: trunk, NOS	Undifferentiated; anaplastic; Grade IV	Positive histology	9260/3: Ewing sarcoma	T2b	N0	M1	None; diagnosed at autopsy	Not recommended	No radiation and/or cancer-directed surgery	Beam radiation	Yes	90	420	0	40	Distant	Single (never married)	363	1167	2972	5656	530	474	3677	81	Alive	Active follow-up	Alive or dead of other cause	Alive or dead due to cancer
21	White	Male	C40.2-Long bones of lower limb and associated joints	Poorly differentiated; Grade III	Positive histology	9260/3: Ewing sarcoma	T1	N0	M0	None; diagnosed at autopsy	Surgery performed	No radiation and/or cancer-directed surgery	None/Unknown	No/Unknown	36	300	0	0	Localized	Single (never married)	434	1253	1516	4290	554	357	3002	80	Alive	Active follow-up	Alive or dead of other cause	Alive or dead due to cancer
19	Other (American Indian/AK Native, Asian/Pacific Islander)	Male	C40.2-Long bones of lower limb and associated joints	Unknown	Positive histology	9261/3: Adamantinoma of long bones	T2	N0	M0	None; diagnosed at autopsy	Surgery performed	No radiation and/or cancer-directed surgery	None/Unknown	No/Unknown	95	200	0	0	Localized	Single (never married)	504	1355	2298	4740	790	481	3105	74	Alive	Active follow-up	Alive or dead of other cause	Alive or dead due to cancer
39	White	Female	C41.2-Vertebral column	Unknown	Positive histology	9260/3: Ewing sarcoma	TX	N0	M0	None; diagnosed at autopsy	Surgery performed	Radiation after surgery	Beam radiation	Yes	999	300	0	0	Localized	Married (including common law)	808	1489	1303	4361	626	338	2994	77	Alive	Active follow-up	Alive or dead of other cause	Alive or dead due to cancer
24	White	Female	C40.2-Long bones of lower limb and associated joints	Unknown	Positive histology	9261/3: Adamantinoma of long bones	T2	N0	M0	None; diagnosed at autopsy	Surgery performed	No radiation and/or cancer-directed surgery	None/Unknown	No/Unknown	126	300	0	0	Localized	Single (never married)	696	1477	2133	4874	488	453	3042	74	Alive	Active follow-up	Alive or dead of other cause	Alive or dead due to cancer
17	White	Female	C41.3-Rib, sternum, clavicle and associated joints	Unknown	Positive exfoliative cytology, no positive histology	9260/3: Ewing sarcoma	T2	N0	M0	None; diagnosed at autopsy	Surgery performed	Radiation after surgery	Beam radiation	Yes	95	400	0	0	Regional	Single (never married)	402	1046	2677	5829	404	256	3656	77	Alive	Active follow-up	Alive or dead of other cause	Alive or dead due to cancer
11	White	Male	C40.2-Long bones of lower limb and associated joints	Undifferentiated; anaplastic; Grade IV	Positive histology	9260/3: Ewing sarcoma	T2	N0	M0	None; diagnosed at autopsy	Surgery performed	No radiation and/or cancer-directed surgery	None/Unknown	Yes	170	400	0	0	Regional	Single (never married)	275	942	2773	5649	427	354	3553	65	Alive	Active follow-up	Alive or dead of other cause	Alive or dead due to cancer
8	White	Male	C41.3-Rib, sternum, clavicle and associated joints	Unknown	Positive histology	9260/3: Ewing sarcoma	T1	N0	M0	None; diagnosed at autopsy	Surgery performed	No radiation and/or cancer-directed surgery	None/Unknown	Yes	60	600	0	0	Regional	Single (never married)	654	1459	1539	4158	714	327	3531	68	Alive	Active follow-up	Alive or dead of other cause	Alive or dead due to cancer
6	White	Female	C49.5-Conn, subcutaneous, other soft tis: pelvis	Unknown	Positive histology	9260/3: Ewing sarcoma	TX	N0	M1	Non-primary surgical procedure to distant site	Not recommended	Radiation after surgery	Beam radiation	Yes	122	999	0	40	Distant	Single (never married)	275	942	2773	5649	427	354	3553	6	Dead	Active follow-up	Dead (attributable to this cancer dx)	Alive or dead due to cancer
7	White	Female	C41.9-Bone, NOS	Undifferentiated; anaplastic; Grade IV	Positive histology	9260/3: Ewing sarcoma	TX	NX	M1b	Non-primary surgical procedure performed	Not recommended	Radiation after surgery	Beam radiation	Yes	999	999	999	40	Distant	Single (never married)	692	1503	1363	4318	570	391	2993	18	Dead	Active follow-up	Dead (attributable to this cancer dx)	Alive or dead due to cancer
38	White	Male	C49.3-Conn, subcutaneous, other soft tis: thorax	Unknown	Positive histology	9260/3: Ewing sarcoma	T2a	N0	M1	None; diagnosed at autopsy	Not recommended	No radiation and/or cancer-directed surgery	None/Unknown	Yes	98	410	0	40	Distant	Single (never married)	1000	1634	1597	4704	450	244	2856	8	Dead	Active follow-up	Dead (attributable to this cancer dx)	Alive or dead due to cancer
53	White	Female	C22.0-Liver	Unknown	Positive histology	9260/3: Ewing sarcoma	NA	NA	NA	None; diagnosed at autopsy	Not recommended	No radiation and/or cancer-directed surgery	None/Unknown	Yes	216	999	999	99	Unstaged	Married (including common law)	402	1046	2677	5829	404	256	3656	10	Dead	Active follow-up	Dead (attributable to this cancer dx)	Alive or dead due to cancer
17	White	Male	C41.4-Pelvic bones, sacrum, coccyx and associated joints	Undifferentiated; anaplastic; Grade IV	Positive histology	9260/3: Ewing sarcoma	T2	N0	M0	None; diagnosed at autopsy	Not recommended	No radiation and/or cancer-directed surgery	Beam radiation	Yes	104	300	0	0	Localized	Single (never married)	692	1783	1304	4130	519	473	2448	66	Alive	Active follow-up	Alive or dead of other cause	Alive or dead due to cancer
8	White	Female	C41.4-Pelvic bones, sacrum, coccyx and associated joints	Unknown	Positive histology	9260/3: Ewing sarcoma	TX	N0	M1b	None; diagnosed at autopsy	Surgery performed	Radiation prior to surgery	Beam radiation	Yes	44	999	0	40	Distant	Single (never married)	239	647	4450	5547	547	439	4362	71	Alive	Active follow-up	Alive or dead of other cause	Alive or dead due to cancer
14	White	Male	C41.4-Pelvic bones, sacrum, coccyx and associated joints	Unknown	Positive histology	9260/3: Ewing sarcoma	T2	N0	M0	None; diagnosed at autopsy	Not recommended	No radiation and/or cancer-directed surgery	Beam radiation	Yes	136	400	0	0	Regional	Single (never married)	496	1319	1589	5007	479	308	2980	15	Dead	Active follow-up	Dead (attributable to this cancer dx)	Alive or dead due to cancer
32	White	Female	C17.2-Ileum	Unknown	Positive histology	9260/3: Ewing sarcoma	NA	NA	NA	None; diagnosed at autopsy	Surgery performed	No radiation and/or cancer-directed surgery	None/Unknown	Yes	20	500	0	0	Localized	Married (including common law)	363	1167	2972	5656	530	474	3677	36	Dead	Active follow-up	Dead (attributable to this cancer dx)	Alive or dead due to cancer
15	White	Male	C40.2-Long bones of lower limb and associated joints	Unknown	Positive histology	9260/3: Ewing sarcoma	T1	N0	M1b	Non-primary surgical procedure to distant site	Surgery performed	Radiation after surgery	Beam radiation	Yes	58	400	0	40	Distant	Single (never married)	363	1167	2972	5656	530	474	3677	55	Alive	Active follow-up	Alive or dead of other cause	Alive or dead due to cancer
1	White	Female	C40.0-Long bones: upper limb, scapula, and associated joints	Unknown	Positive histology	9260/3: Ewing sarcoma	TX	N0	M0	None; diagnosed at autopsy	Not recommended	No radiation and/or cancer-directed surgery	Beam radiation	Yes	999	200	0	0	Localized	Single (never married)	591	1499	1266	4459	500	431	3011	57	Alive	Active follow-up	Alive or dead of other cause	Alive or dead due to cancer
15	White	Male	C40.2-Long bones of lower limb and associated joints	Unknown	Positive histology	9260/3: Ewing sarcoma	T2	N0	M0	None; diagnosed at autopsy	Not recommended	No radiation and/or cancer-directed surgery	Beam radiation	Yes	260	400	0	0	Regional	Single (never married)	708	1560	1351	4404	420	371	2846	52	Alive	Active follow-up	Alive or dead of other cause	Alive or dead due to cancer
14	White	Female	C49.3-Conn, subcutaneous, other soft tis: thorax	Unknown	Positive histology	9260/3: Ewing sarcoma	T2b	N0	M0	Non-primary surgical procedure to other regional sites	Surgery performed	No radiation and/or cancer-directed surgery	None/Unknown	Yes	70	620	0	0	Regional	Single (never married)	753	1600	1451	4518	566	409	3199	56	Alive	Active follow-up	Alive or dead of other cause	Alive or dead due to cancer
15	White	Male	C41.4-Pelvic bones, sacrum, coccyx and associated joints	Unknown	Positive histology	9260/3: Ewing sarcoma	T2	N0	M1a	None; diagnosed at autopsy	Surgery performed	Radiation after surgery	Beam radiation	Yes	135	400	0	30	Distant	Single (never married)	1468	2129	1425	4514	491	239	3028	44	Alive	Active follow-up	Alive or dead of other cause	Alive or dead due to cancer
14	White	Male	C49.2-Conn, subcutaneous, other soft tis: lower limb, hip	Unknown	Positive histology	9260/3: Ewing sarcoma	T1NOS	N0	M0	None; diagnosed at autopsy	Surgery performed	No radiation and/or cancer-directed surgery	None/Unknown	Yes	45	300	0	0	Localized	Single (never married)	508	1439	1438	4645	765	497	2564	38	Alive	Active follow-up	Alive or dead of other cause	Alive or dead due to cancer
74	White	Female	C40.2-Long bones of lower limb and associated joints	Unknown	Positive histology	9260/3: Ewing sarcoma	T1	N0	M0	None; diagnosed at autopsy	Surgery performed	No radiation and/or cancer-directed surgery	None/Unknown	No/Unknown	25	400	0	0	Regional	Widowed	504	1355	2298	4740	790	481	3105	40	Alive	Active follow-up	N/A not first tumor	N/A not first tumor
27	White	Male	C34.3-Lower lobe, lung	Undifferentiated; anaplastic; Grade IV	Positive histology	9260/3: Ewing sarcoma	NA	NA	NA	None; diagnosed at autopsy	Not recommended	No radiation and/or cancer-directed surgery	Beam radiation	Yes	100	600	0	23	Distant	Married (including common law)	466	1268	1472	4145	741	388	2694	39	Alive	Active follow-up	Alive or dead of other cause	Alive or dead due to cancer
62	White	Female	C41.4-Pelvic bones, sacrum, coccyx and associated joints	Unknown	Positive histology	9260/3: Ewing sarcoma	T1	N0	M0	None; diagnosed at autopsy	Not recommended	No radiation and/or cancer-directed surgery	Beam radiation	Yes	53	800	0	0	Distant	Married (including common law)	846	1969	1716	4837	634	394	2701	59	Alive	Active follow-up	Alive or dead of other cause	Alive or dead due to cancer
15	White	Male	C40.2-Long bones of lower limb and associated joints	Unknown	Positive histology	9261/3: Adamantinoma of long bones	T2	N0	M0	None; diagnosed at autopsy	Surgery performed	No radiation and/or cancer-directed surgery	None/Unknown	No/Unknown	135	300	0	0	Localized	Single (never married)	239	647	4450	5547	547	439	4362	38	Alive	Active follow-up	Alive or dead of other cause	Alive or dead due to cancer
23	White	Female	C41.4-Pelvic bones, sacrum, coccyx and associated joints	Undifferentiated; anaplastic; Grade IV	Positive histology	9260/3: Ewing sarcoma	T2	N0	M0	None; diagnosed at autopsy	Not recommended	No radiation and/or cancer-directed surgery	Beam radiation	Yes	152	600	0	0	Regional	Single (never married)	850	1556	1284	4123	704	309	3211	38	Alive	Active follow-up	Alive or dead of other cause	Alive or dead due to cancer
19	White	Male	C49.1-Conn, subcutaneous, other soft tis: upr limb, shoulder	Unknown	Positive histology	9260/3: Ewing sarcoma	T1NOS	N0	M0	None; diagnosed at autopsy	Surgery performed	No radiation and/or cancer-directed surgery	None/Unknown	Yes	16	100	0	0	Localized	Single (never married)	435	1368	2487	5205	765	518	3226	37	Alive	Active follow-up	Alive or dead of other cause	Alive or dead due to cancer
25	White	Male	C49.1-Conn, subcutaneous, other soft tis: upr limb, shoulder	Unknown	Positive histology	9260/3: Ewing sarcoma	T2b	N0	M1	Non-primary surgical procedure to distant site	Not recommended	No radiation and/or cancer-directed surgery	None/Unknown	Yes	150	420	0	40	Distant	Single (never married)	696	1477	2133	4874	488	453	3042	37	Alive	Active follow-up	Alive or dead of other cause	Alive or dead due to cancer
12	White	Female	C40.2-Long bones of lower limb and associated joints	Unknown	Positive histology	9260/3: Ewing sarcoma	T2	N0	M0	None; diagnosed at autopsy	Surgery performed	No radiation and/or cancer-directed surgery	None/Unknown	Yes	150	300	0	0	Localized	Single (never married)	363	1167	2972	5656	530	474	3677	36	Alive	Active follow-up	Alive or dead of other cause	Alive or dead due to cancer
16	White	Male	C40.9-Bone of limb, NOS	Unknown	Positive histology	9260/3: Ewing sarcoma	TX	N0	M1NOS	None; diagnosed at autopsy	Not recommended	No radiation and/or cancer-directed surgery	Beam radiation	Yes	999	300	0	60	Distant	Single (never married)	435	1368	2487	5205	765	518	3226	20	Dead	Active follow-up	Dead (attributable to this cancer dx)	Alive or dead due to cancer
27	White	Male	C41.3-Rib, sternum, clavicle and associated joints	Unknown	Positive exfoliative cytology, no positive histology	9260/3: Ewing sarcoma	TX	NX	MX	None; diagnosed at autopsy	Not recommended	No radiation and/or cancer-directed surgery	None/Unknown	Yes	999	999	999	99	Unstaged	Single (never married)	275	942	2773	5649	427	354	3553	9	Alive	Active follow-up	N/A not first tumor	N/A not first tumor
19	White	Male	C40.2-Long bones of lower limb and associated joints	Unknown	Positive histology	9260/3: Ewing sarcoma	T2	N0	M0	None; diagnosed at autopsy	Surgery performed	No radiation and/or cancer-directed surgery	None/Unknown	Yes	300	350	0	0	Localized	Single (never married)	504	1355	2298	4740	790	481	3105	6	Dead	Active follow-up	Dead (attributable to this cancer dx)	Alive or dead due to cancer
39	White	Female	C49.3-Conn, subcutaneous, other soft tis: thorax	Undifferentiated; anaplastic; Grade IV	Positive histology	9260/3: Ewing sarcoma	T2NOS	N1	M0	None; diagnosed at autopsy	Surgery performed	No radiation and/or cancer-directed surgery	None/Unknown	Yes	120	300	100	0	Regional	Single (never married)	495	1420	1595	4509	822	551	2603	27	Alive	Active follow-up	Alive or dead of other cause	Alive or dead due to cancer
40	White	Female	C49.3-Conn, subcutaneous, other soft tis: thorax	Unknown	Positive histology	9260/3: Ewing sarcoma	T2b	N0	M0	None; diagnosed at autopsy	Not recommended	No radiation and/or cancer-directed surgery	Beam radiation	Yes	56	315	0	0	Localized	Single (never married)	495	1420	1595	4509	822	551	2603	8	Alive	Active follow-up	N/A not first tumor	N/A not first tumor
25	White	Male	C41.2-Vertebral column	Unknown	Positive histology	9260/3: Ewing sarcoma	TX	N0	M0	None; diagnosed at autopsy	Surgery performed	Radiation after surgery	Beam radiation	Yes	999	400	0	0	Regional	Single (never married)	472	1226	1626	4885	399	229	2868	31	Alive	Active follow-up	Alive or dead of other cause	Alive or dead due to cancer
18	White	Male	C40.2-Long bones of lower limb and associated joints	Unknown	Positive histology	9260/3: Ewing sarcoma	TX	NX	M1a	None; diagnosed at autopsy	Surgery performed	No radiation and/or cancer-directed surgery	None/Unknown	Yes	999	300	999	30	Distant	Single (never married)	846	1969	1716	4837	634	394	2701	20	Alive	Active follow-up	Alive or dead of other cause	Alive or dead due to cancer
20	White	Male	C40.2-Long bones of lower limb and associated joints	Unknown	Positive histology	9260/3: Ewing sarcoma	T1	N0	M0	None; diagnosed at autopsy	Surgery performed	No radiation and/or cancer-directed surgery	None/Unknown	Yes	36	400	0	0	Regional	Single (never married)	275	942	2773	5649	427	354	3553	18	Alive	Active follow-up	Alive or dead of other cause	Alive or dead due to cancer
19	White	Male	C40.2-Long bones of lower limb and associated joints	Unknown	Positive histology	9260/3: Ewing sarcoma	T1	N1	M1b	None; diagnosed at autopsy	Surgery performed	No radiation and/or cancer-directed surgery	None/Unknown	Yes	50	400	100	40	Distant	Single (never married)	435	1368	2487	5205	765	518	3226	13	Alive	Active follow-up	Alive or dead of other cause	Alive or dead due to cancer
65	White	Female	C40.2-Long bones of lower limb and associated joints	Unknown	Positive histology	9261/3: Adamantinoma of long bones	T1	N0	M0	None; diagnosed at autopsy	Surgery performed	No radiation and/or cancer-directed surgery	None/Unknown	No/Unknown	69	100	0	0	Localized	Married (including common law)	846	1969	1716	4837	634	394	2701	28	Alive	Active follow-up	Alive or dead of other cause	Alive or dead due to cancer
8	White	Male	C49.6-Conn, subcutaneous, other soft tis: trunk, NOS	Unknown	Positive histology	9260/3: Ewing sarcoma	T2b	N0	M0	None; diagnosed at autopsy	Surgery performed	Radiation after surgery	Beam radiation	Yes	70	600	0	0	Regional	Single (never married)	402	1046	2677	5829	404	256	3656	12	Alive	Active follow-up	Alive or dead of other cause	Alive or dead due to cancer
21	White	Male	C40.2-Long bones of lower limb and associated joints	Unknown	Positive histology	9260/3: Ewing sarcoma	T1	N0	M1b	None; diagnosed at autopsy	Recommended, unknown if performed	No radiation and/or cancer-directed surgery	None/Unknown	Yes	70	300	0	40	Distant	Single (never married)	732	1738	1653	4356	754	447	2804	7	Alive	Active follow-up	Alive or dead of other cause	Alive or dead due to cancer
14	White	Male	C41.4-Pelvic bones, sacrum, coccyx and associated joints	Unknown	Positive histology	9260/3: Ewing sarcoma	T3	N0	M1b	None; diagnosed at autopsy	Recommended, unknown if performed	No radiation and/or cancer-directed surgery	Beam radiation	Yes	88	820	0	40	Distant	Single (never married)	607	1299	1575	4895	341	227	2869	8	Alive	Active follow-up	Alive or dead of other cause	Alive or dead due to cancer
53	White	Male	C72.0-Spinal cord	Unknown	Positive histology	9260/3: Ewing sarcoma	NA	NA	NA	None; diagnosed at autopsy	Surgery performed	Radiation after surgery	Beam radiation	Yes	999	999	988	0	Unstaged	Single (never married)	781	1771	1703	4663	712	440	2860	16	Alive	Active follow-up	Alive or dead of other cause	Alive or dead due to cancer
31	White	Female	C40.0-Long bones: upper limb, scapula, and associated joints	Unknown	Positive histology	9260/3: Ewing sarcoma	T2	N0	M0	None; diagnosed at autopsy	Surgery performed	No radiation and/or cancer-directed surgery	None/Unknown	Yes	145	400	0	0	Regional	Married (including common law)	279	634	4760	6011	523	392	4405	5	Alive	Active follow-up	Alive or dead of other cause	Alive or dead due to cancer
28	White	Female	C64.9-Kidney, NOS	Unknown	Positive histology	9260/3: Ewing sarcoma	NA	NA	NA	None; diagnosed at autopsy	Surgery performed	No radiation and/or cancer-directed surgery	None/Unknown	Yes	56	100	0	0	Localized	Single (never married)	363	1167	2972	5656	530	474	3677	5	Alive	Active follow-up	Alive or dead of other cause	Alive or dead due to cancer
9	White	Male	C41.0-Bones of skull and face and associated joints	Unknown	Positive histology	9260/3: Ewing sarcoma	T1	NX	M0	None; diagnosed at autopsy	Surgery performed	No radiation and/or cancer-directed surgery	None/Unknown	Yes	72	400	999	0	Regional	Single (never married)	363	1167	2972	5656	530	474	3677	6	Alive	Active follow-up	Alive or dead of other cause	Alive or dead due to cancer
4	White	Female	C40.2-Long bones of lower limb and associated joints	Undifferentiated; anaplastic; Grade IV	Positive histology	9260/3: Ewing sarcoma	T1	N0	M0	None; diagnosed at autopsy	Surgery performed	No radiation and/or cancer-directed surgery	None/Unknown	Yes	56	300	0	0	Localized	Single (never married)	671	1546	1201	4003	638	486	3305	21	Alive	Active follow-up	Alive or dead of other cause	Alive or dead due to cancer
13	White	Male	C40.2-Long bones of lower limb and associated joints	Unknown	Positive histology	9260/3: Ewing sarcoma	T2	N0	M0	None; diagnosed at autopsy	Surgery performed	No radiation and/or cancer-directed surgery	None/Unknown	Yes	130	200	0	0	Localized	Single (never married)	435	1368	2487	5205	765	518	3226	0	Alive	Active follow-up	Alive or dead of other cause	Alive or dead due to cancer
18	White	Female	C49.3-Conn, subcutaneous, other soft tis: thorax	Unknown	Positive histology	9260/3: Ewing sarcoma	T2b	N1	M1	None; diagnosed at autopsy	Surgery performed	Radiation prior to surgery	Beam radiation	Yes	127	620	100	40	Distant	Single (never married)	456	1399	2484	4898	898	620	3754	16	Dead	Active follow-up	Dead (attributable to this cancer dx)	Alive or dead due to cancer
20	White	Female	C41.2-Vertebral column	Undifferentiated; anaplastic; Grade IV	Positive histology	9260/3: Ewing sarcoma	T1	N0	M0	None; diagnosed at autopsy	Surgery performed	No radiation and/or cancer-directed surgery	None/Unknown	Yes	62	300	0	0	Localized	Single (never married)	1413	2745	1622	3253	1760	903	2859	117	Dead	Active follow-up	Dead (attributable to this cancer dx)	Alive or dead due to cancer
9	White	Female	C49.1-Conn, subcutaneous, other soft tis: upr limb, shoulder	Unknown	Positive histology	9260/3: Ewing sarcoma	TX	N0	M0	None; diagnosed at autopsy	Surgery performed	No radiation and/or cancer-directed surgery	None/Unknown	Yes	999	120	0	0	Localized	Single (never married)	604	1557	3051	4661	1020	582	3891	104	Alive	Active follow-up	Alive or dead of other cause	Alive or dead due to cancer
30	White	Male	C41.4-Pelvic bones, sacrum, coccyx and associated joints	Unknown	Positive histology	9260/3: Ewing sarcoma	T3	N0	M1b	Non-primary surgical procedure to distant lymph node(s)	Not recommended	Radiation after surgery	Beam radiation	Yes	104	820	0	50	Distant	Married (including common law)	604	1557	3051	4661	1020	582	3891	25	Dead	Active follow-up	Dead (attributable to this cancer dx)	Alive or dead due to cancer
25	White	Male	C49.6-Conn, subcutaneous, other soft tis: trunk, NOS	Unknown	Positive histology	9260/3: Ewing sarcoma	TX	N0	M0	None; diagnosed at autopsy	Surgery performed	No radiation and/or cancer-directed surgery	None/Unknown	No/Unknown	999	300	0	0	Localized	Married (including common law)	1821	2995	2229	3358	2018	920	3396	101	Alive	Active follow-up	Alive or dead of other cause	Alive or dead due to cancer
17	White	Female	C41.9-Bone, NOS	Unknown	Positive histology	9260/3: Ewing sarcoma	TX	N0	M0	None; diagnosed at autopsy	Surgery performed	No radiation and/or cancer-directed surgery	None/Unknown	Yes	999	999	0	0	Unstaged	Single (never married)	604	1557	3051	4661	1020	582	3891	87	Alive	Active follow-up	Alive or dead of other cause	Alive or dead due to cancer
11	White	Female	C49.2-Conn, subcutaneous, other soft tis: lower limb, hip	Unknown	Positive histology	9260/3: Ewing sarcoma	T2a	N0	M1	None; diagnosed at autopsy	Surgery performed	No radiation and/or cancer-directed surgery	None/Unknown	Yes	100	110	0	40	Distant	Single (never married)	1487	3292	1164	3467	1726	912	2697	90	Alive	Active follow-up	Alive or dead of other cause	Alive or dead due to cancer
16	White	Male	C49.6-Conn, subcutaneous, other soft tis: trunk, NOS	Unknown	Positive histology	9260/3: Ewing sarcoma	T2b	N0	M0	None; diagnosed at autopsy	Surgery performed	No radiation and/or cancer-directed surgery	None/Unknown	Yes	82	620	0	0	Regional	Single (never married)	1169	2700	1543	3290	1657	824	3164	91	Alive	Active follow-up	Alive or dead of other cause	Alive or dead due to cancer
12	White	Female	C49.3-Conn, subcutaneous, other soft tis: thorax	Unknown	Positive histology	9260/3: Ewing sarcoma	T1b	N0	M0	None; diagnosed at autopsy	Surgery performed	No radiation and/or cancer-directed surgery	None/Unknown	Yes	45	420	0	0	Regional	Single (never married)	604	1557	3051	4661	1020	582	3891	79	Alive	Active follow-up	Alive or dead of other cause	Alive or dead due to cancer
15	White	Male	C41.4-Pelvic bones, sacrum, coccyx and associated joints	Unknown	Positive histology	9260/3: Ewing sarcoma	T2	N0	M0	None; diagnosed at autopsy	Surgery performed	Radiation after surgery	Beam radiation	Yes	110	400	0	0	Regional	Single (never married)	604	1557	3051	4661	1020	582	3891	79	Dead	Active follow-up	Alive or dead of other cause	Dead (attributable to causes other than this cancer dx)
26	White	Male	C41.2-Vertebral column	Unknown	Positive histology	9260/3: Ewing sarcoma	TX	NX	M0	None; diagnosed at autopsy	Not recommended	No radiation and/or cancer-directed surgery	Radiation, NOS method or source not specified	No/Unknown	999	999	999	0	Unstaged	Separated	1821	2995	2229	3358	2018	920	3396	92	Alive	Active follow-up	Alive or dead of other cause	Alive or dead due to cancer
9	White	Male	C49.3-Conn, subcutaneous, other soft tis: thorax	Unknown	Positive histology	9260/3: Ewing sarcoma	T2b	N0	M0	None; diagnosed at autopsy	Surgery performed	Radiation after surgery	Beam radiation	Yes	130	420	0	0	Regional	Single (never married)	930	2496	1201	3071	2154	1148	3469	75	Alive	Active follow-up	Alive or dead of other cause	Alive or dead due to cancer
11	White	Male	C40.2-Long bones of lower limb and associated joints	Unknown	Positive histology	9260/3: Ewing sarcoma	TX	NX	MX	None; diagnosed at autopsy	Surgery performed	No radiation and/or cancer-directed surgery	None/Unknown	Yes	999	999	999	99	Unstaged	Single (never married)	772	1897	1545	3478	1557	815	3077	29	Dead	Active follow-up	Dead (attributable to this cancer dx)	Alive or dead due to cancer
16	White	Male	C49.2-Conn, subcutaneous, other soft tis: lower limb, hip	Unknown	Positive histology	9260/3: Ewing sarcoma	T2a	N0	M1	Non-primary surgical procedure to distant site	Surgery performed	Radiation after surgery	Beam radiation	Yes	60	410	0	40	Distant	Single (never married)	604	1557	3051	4661	1020	582	3891	9	Dead	Active follow-up	Dead (attributable to this cancer dx)	Alive or dead due to cancer
18	White	Female	C64.9-Kidney, NOS	Unknown	Positive histology	9260/3: Ewing sarcoma	NA	NA	NA	Non-primary surgical procedure to distant site	Surgery performed	No radiation and/or cancer-directed surgery	None/Unknown	Yes	228	300	0	40	Distant	Single (never married)	604	1557	3051	4661	1020	582	3891	15	Dead	Active follow-up	Dead (attributable to this cancer dx)	Alive or dead due to cancer
10	White	Male	C40.9-Bone of limb, NOS	Unknown	Positive histology	9260/3: Ewing sarcoma	TX	NX	MX	None; diagnosed at autopsy	Not recommended	No radiation and/or cancer-directed surgery	None/Unknown	Yes	999	999	999	99	Unstaged	Single (never married)	604	1557	3051	4661	1020	582	3891	30	Alive	Active follow-up	Alive or dead of other cause	Alive or dead due to cancer
60	White	Male	C49.2-Conn, subcutaneous, other soft tis: lower limb, hip	Unknown	Positive histology	9260/3: Ewing sarcoma	T2b	N0	M0	None; diagnosed at autopsy	Surgery performed	No radiation and/or cancer-directed surgery	None/Unknown	Yes	76	120	0	0	Localized	Divorced	660	1551	3692	5000	944	470	4308	17	Dead	Active follow-up	Dead (attributable to this cancer dx)	Alive or dead due to cancer
14	White	Male	C41.2-Vertebral column	Unknown	Positive histology	9260/3: Ewing sarcoma	T1	N0	M0	None; diagnosed at autopsy	Not recommended	No radiation and/or cancer-directed surgery	None/Unknown	Yes	22	100	0	0	Localized	Single (never married)	604	1557	3051	4661	1020	582	3891	63	Alive	Active follow-up	Alive or dead of other cause	Alive or dead due to cancer
7	White	Female	C40.2-Long bones of lower limb and associated joints	Unknown	Positive histology	9260/3: Ewing sarcoma	TX	NX	MX	None; diagnosed at autopsy	Surgery performed	No radiation and/or cancer-directed surgery	None/Unknown	Yes	999	999	999	99	Unstaged	Single (never married)	929	2321	1353	3738	1799	907	2654	71	Alive	Active follow-up	Alive or dead of other cause	Alive or dead due to cancer
20	White	Male	C41.4-Pelvic bones, sacrum, coccyx and associated joints	Unknown	Radiography without microscopic confirm	9260/3: Ewing sarcoma	T2	NX	MX	None; diagnosed at autopsy	Recommended but not performed, unknown reason	No radiation and/or cancer-directed surgery	None/Unknown	No/Unknown	400	800	999	99	Distant	Single (never married)	1413	2745	1622	3253	1760	903	2859	42	Dead	Active follow-up	Dead (attributable to this cancer dx)	Alive or dead due to cancer
53	White	Female	C49.4-Conn, subcutaneous, other soft tis: abdomen	Unknown	Positive histology	9260/3: Ewing sarcoma	T2NOS	N0	M0	None; diagnosed at autopsy	Not recommended	No radiation and/or cancer-directed surgery	Beam radiation	Yes	75	300	0	0	Localized	Married (including common law)	660	1551	3692	5000	944	470	4308	57	Alive	Active follow-up	Alive or dead of other cause	Alive or dead due to cancer
22	White	Male	C49.1-Conn, subcutaneous, other soft tis: upr limb, shoulder	Unknown	Positive histology	9260/3: Ewing sarcoma	T2b	N0	M1	None; diagnosed at autopsy	Not recommended	No radiation and/or cancer-directed surgery	Beam radiation	Yes	110	420	0	40	Distant	Single (never married)	604	1557	3051	4661	1020	582	3891	9	Dead	Active follow-up	Dead (attributable to this cancer dx)	Alive or dead due to cancer
34	White	Female	C41.2-Vertebral column	Unknown	Positive histology	9260/3: Ewing sarcoma	TX	N0	M0	None; diagnosed at autopsy	Surgery performed	Radiation after surgery	Beam radiation	Yes	999	300	0	0	Localized	Single (never married)	604	1557	3051	4661	1020	582	3891	49	Dead	Active follow-up	Dead (attributable to this cancer dx)	Alive or dead due to cancer
15	White	Female	C49.6-Conn, subcutaneous, other soft tis: trunk, NOS	Unknown	Positive histology	9260/3: Ewing sarcoma	T1NOS	N0	M0	None; diagnosed at autopsy	Surgery performed	No radiation and/or cancer-directed surgery	None/Unknown	Yes	10	300	0	0	Localized	Single (never married)	604	1557	3051	4661	1020	582	3891	43	Alive	Active follow-up	Alive or dead of other cause	Alive or dead due to cancer
3	White	Male	C49.1-Conn, subcutaneous, other soft tis: upr limb, shoulder	Poorly differentiated; Grade III	Positive histology	9260/3: Ewing sarcoma	T2NOS	N1	M1	None; diagnosed at autopsy	Surgery performed	No radiation and/or cancer-directed surgery	None/Unknown	Yes	123	300	800	40	Distant	Single (never married)	604	1557	3051	4661	1020	582	3891	6	Alive	Active follow-up	Alive or dead of other cause	Alive or dead due to cancer
26	White	Female	C40.2-Long bones of lower limb and associated joints	Unknown	Positive histology	9260/3: Ewing sarcoma	TX	N0	M1b	None; diagnosed at autopsy	Not recommended	No radiation and/or cancer-directed surgery	Beam radiation	Yes	999	999	0	40	Distant	Single (never married)	604	1557	3051	4661	1020	582	3891	11	Dead	Active follow-up	Dead (attributable to this cancer dx)	Alive or dead due to cancer
7	Other (American Indian/AK Native, Asian/Pacific Islander)	Female	C41.4-Pelvic bones, sacrum, coccyx and associated joints	Unknown	Positive histology	9260/3: Ewing sarcoma	TX	NX	MX	None; diagnosed at autopsy	Surgery performed	No radiation and/or cancer-directed surgery	None/Unknown	Yes	999	600	999	99	Regional	Single (never married)	604	1557	3051	4661	1020	582	3891	18	Alive	Active follow-up	Alive or dead of other cause	Alive or dead due to cancer
16	Other (American Indian/AK Native, Asian/Pacific Islander)	Male	C38.2-Posterior mediastinum	Unknown	Positive histology	9260/3: Ewing sarcoma	T2b	N0	M0	None; diagnosed at autopsy	Not recommended	No radiation and/or cancer-directed surgery	Beam radiation	Yes	94	600	0	0	Blank(s)	Single (never married)	929	2321	1353	3738	1799	907	2654	34	Alive	Active follow-up	Alive or dead of other cause	Alive or dead due to cancer
18	White	Male	C41.4-Pelvic bones, sacrum, coccyx and associated joints	Unknown	Positive histology	9260/3: Ewing sarcoma	T2	N0	MX	Non-primary surgical procedure to other regional sites	Surgery performed	No radiation and/or cancer-directed surgery	None/Unknown	Yes	997	400	0	99	Regional	Unknown	1821	2995	2229	3358	2018	920	3396	32	Alive	Active follow-up	Alive or dead of other cause	Alive or dead due to cancer
16	White	Female	C41.4-Pelvic bones, sacrum, coccyx and associated joints	Undifferentiated; anaplastic; Grade IV	Positive histology	9260/3: Ewing sarcoma	T1	NX	M1b	None; diagnosed at autopsy	Not recommended	No radiation and/or cancer-directed surgery	None/Unknown	No/Unknown	70	400	999	40	Distant	Married (including common law)	1821	2995	2229	3358	2018	920	3396	2	Dead	Active follow-up	Dead (attributable to this cancer dx)	Alive or dead due to cancer
30	White	Male	C41.2-Vertebral column	Unknown	Positive histology	9260/3: Ewing sarcoma	TX	NX	MX	None; diagnosed at autopsy	Surgery performed	Radiation after surgery	Beam radiation	Yes	999	999	999	99	Unstaged	Unknown	1821	2995	2229	3358	2018	920	3396	14	Dead	Active follow-up	Alive or dead of other cause	Dead (attributable to causes other than this cancer dx)
46	White	Male	C41.1-Mandible	Unknown	Positive histology	9260/3: Ewing sarcoma	T1	N0	M0	None; diagnosed at autopsy	Recommended but not performed, unknown reason	No radiation and/or cancer-directed surgery	None/Unknown	Yes	69	800	0	0	Distant	Married (including common law)	456	1399	2484	4898	898	620	3754	18	Alive	Active follow-up	Alive or dead of other cause	Alive or dead due to cancer
10	White	Female	C41.3-Rib, sternum, clavicle and associated joints	Unknown	Positive histology	9260/3: Ewing sarcoma	T2	N0	M0	None; diagnosed at autopsy	Surgery performed	No radiation and/or cancer-directed surgery	None/Unknown	Yes	110	400	0	0	Regional	Single (never married)	604	1557	3051	4661	1020	582	3891	13	Alive	Active follow-up	Alive or dead of other cause	Alive or dead due to cancer
17	White	Female	C40.0-Long bones: upper limb, scapula, and associated joints	Unknown	Positive histology	9260/3: Ewing sarcoma	T2	N0	M0	None; diagnosed at autopsy	Surgery performed	No radiation and/or cancer-directed surgery	None/Unknown	Yes	100	400	0	0	Regional	Single (never married)	789	2159	1527	3390	1551	687	2879	15	Alive	Active follow-up	Alive or dead of other cause	Alive or dead due to cancer
23	White	Female	C41.4-Pelvic bones, sacrum, coccyx and associated joints	Unknown	Positive histology	9260/3: Ewing sarcoma	TX	NX	MX	Unknown; death certificate only	Unknown; death certificate; or autopsy only (2003+)	No radiation and/or cancer-directed surgery	None/Unknown	No/Unknown	999	999	999	99	Unstaged	Unknown	604	1557	3051	4661	1020	582	3891	42	Alive	Active follow-up	Alive or dead of other cause	Alive or dead due to cancer
6	White	Male	C40.2-Long bones of lower limb and associated joints	Unknown	Positive histology	9260/3: Ewing sarcoma	T2	N0	M0	None; diagnosed at autopsy	Recommended, unknown if performed	No radiation and/or cancer-directed surgery	None/Unknown	Yes	81	400	0	0	Regional	Single (never married)	1821	2995	2229	3358	2018	920	3396	8	Alive	Active follow-up	Alive or dead of other cause	Alive or dead due to cancer
57	White	Male	C41.4-Pelvic bones, sacrum, coccyx and associated joints	Unknown	Positive histology	9260/3: Ewing sarcoma	T2	N0	M1b	None; diagnosed at autopsy	Not recommended	No radiation and/or cancer-directed surgery	Beam radiation	Yes	119	400	0	40	Distant	Married (including common law)	336	1313	2059	5210	748	645	3137	4	Dead	Active follow-up	N/A not first tumor	N/A not first tumor
62	White	Male	C41.9-Bone, NOS	Unknown	Unknown	9260/3: Ewing sarcoma	TX	NX	MX	Unknown; death certificate only	Unknown; death certificate; or autopsy only (2003+)	No radiation and/or cancer-directed surgery	None/Unknown	No/Unknown	999	999	999	99	Unstaged	Married (including common law)	260	1082	2445	6073	485	498	3476	Unknown	Dead	Autopsy/death certificate only cases	N/A not first tumor	N/A not first tumor
15	Other (American Indian/AK Native, Asian/Pacific Islander)	Male	C41.4-Pelvic bones, sacrum, coccyx and associated joints	Moderately differentiated; Grade II	Positive histology	9260/3: Ewing sarcoma	T1	N0	M0	None; diagnosed at autopsy	Surgery performed	Radiation after surgery	Beam radiation	Yes	56	800	0	0	Distant	Single (never married)	342	974	3995	6604	534	448	4399	117	Alive	Active follow-up	Alive or dead of other cause	Alive or dead due to cancer
17	White	Male	C41.4-Pelvic bones, sacrum, coccyx and associated joints	Unknown	Positive histology	9260/3: Ewing sarcoma	TX	N1	M1b	None; diagnosed at autopsy	Not recommended	No radiation and/or cancer-directed surgery	Beam radiation	Yes	999	300	100	40	Distant	Single (never married)	342	974	3995	6604	534	448	4399	21	Dead	Active follow-up	Dead (attributable to this cancer dx)	Alive or dead due to cancer
52	White	Female	C64.9-Kidney, NOS	Unknown	Positive histology	9260/3: Ewing sarcoma	NA	NA	NA	None; diagnosed at autopsy	Surgery performed	No radiation and/or cancer-directed surgery	None/Unknown	No/Unknown	80	600	0	0	Regional	Married (including common law)	342	974	3995	6604	534	448	4399	23	Alive	Active follow-up	Alive or dead of other cause	Alive or dead due to cancer
24	White	Male	C49.5-Conn, subcutaneous, other soft tis: pelvis	Unknown	Positive histology	9260/3: Ewing sarcoma	T2b	N0	M1	None; diagnosed at autopsy	Surgery performed	No radiation and/or cancer-directed surgery	None/Unknown	Yes	134	620	0	40	Distant	Single (never married)	342	974	3995	6604	534	448	4399	18	Dead	Active follow-up	Dead (attributable to this cancer dx)	Alive or dead due to cancer
20	White	Male	C40.2-Long bones of lower limb and associated joints	Unknown	Positive histology	9260/3: Ewing sarcoma	T2	N0	M0	None; diagnosed at autopsy	Surgery performed	No radiation and/or cancer-directed surgery	None/Unknown	Yes	89	400	0	0	Regional	Single (never married)	336	1313	2059	5210	748	645	3137	39	Dead	Active follow-up	Dead (attributable to this cancer dx)	Alive or dead due to cancer
12	White	Male	C41.4-Pelvic bones, sacrum, coccyx and associated joints	Unknown	Positive histology	9260/3: Ewing sarcoma	TX	N0	M0	None; diagnosed at autopsy	Surgery performed	Radiation after surgery	Beam radiation	Yes	999	400	0	0	Regional	Single (never married)	342	974	3995	6604	534	448	4399	115	Alive	Active follow-up	Alive or dead of other cause	Alive or dead due to cancer
25	White	Male	C40.2-Long bones of lower limb and associated joints	Undifferentiated; anaplastic; Grade IV	Positive histology	9260/3: Ewing sarcoma	T2	N0	M0	None; diagnosed at autopsy	Surgery performed	Radiation after surgery	Beam radiation	Yes	90	400	0	0	Regional	Single (never married)	342	974	3995	6604	534	448	4399	110	Alive	Active follow-up	Alive or dead of other cause	Alive or dead due to cancer
12	White	Male	C41.1-Mandible	Unknown	Positive histology	9260/3: Ewing sarcoma	T1	N0	M0	None; diagnosed at autopsy	Not recommended	No radiation and/or cancer-directed surgery	Beam radiation	Yes	51	100	0	0	Localized	Single (never married)	260	1082	2445	6073	485	498	3476	107	Alive	Active follow-up	Alive or dead of other cause	Alive or dead due to cancer
31	White	Male	C49.3-Conn, subcutaneous, other soft tis: thorax	Unknown	Positive histology	9260/3: Ewing sarcoma	T1b	N0	M0	None; diagnosed at autopsy	Surgery performed	No radiation and/or cancer-directed surgery	None/Unknown	Yes	15	120	0	0	Localized	Married (including common law)	260	1082	2445	6073	485	498	3476	108	Alive	Active follow-up	Alive or dead of other cause	Alive or dead due to cancer
9	White	Male	C40.2-Long bones of lower limb and associated joints	Unknown	Positive histology	9260/3: Ewing sarcoma	TX	N0	M1a	Non-primary surgical procedure to distant site	Surgery performed	No radiation and/or cancer-directed surgery	None/Unknown	Yes	999	300	0	30	Distant	Single (never married)	342	974	3995	6604	534	448	4399	106	Alive	Active follow-up	Alive or dead of other cause	Alive or dead due to cancer
15	White	Female	C40.2-Long bones of lower limb and associated joints	Unknown	Positive histology	9260/3: Ewing sarcoma	TX	N0	M0	None; diagnosed at autopsy	Surgery performed	No radiation and/or cancer-directed surgery	None/Unknown	Yes	999	100	0	0	Localized	Single (never married)	169	790	2703	5136	512	571	3545	89	Alive	Active follow-up	Alive or dead of other cause	Alive or dead due to cancer
16	White	Male	C49.3-Conn, subcutaneous, other soft tis: thorax	Unknown	Positive histology	9260/3: Ewing sarcoma	T1a	N0	M0	None; diagnosed at autopsy	Surgery performed	No radiation and/or cancer-directed surgery	None/Unknown	Yes	8	610	0	0	Regional	Single (never married)	361	1628	1556	4425	878	831	2833	104	Alive	Active follow-up	Alive or dead of other cause	Alive or dead due to cancer
43	White	Male	C49.5-Conn, subcutaneous, other soft tis: pelvis	Undifferentiated; anaplastic; Grade IV	Positive histology	9260/3: Ewing sarcoma	T2b	N0	M0	None; diagnosed at autopsy	Surgery performed	No radiation and/or cancer-directed surgery	Recommended, unknown if administered	Yes	200	120	0	0	Localized	Married (including common law)	336	1313	2059	5210	748	645	3137	7	Dead	Active follow-up	Dead (attributable to this cancer dx)	Alive or dead due to cancer
6	White	Female	C49.3-Conn, subcutaneous, other soft tis: thorax	Unknown	Positive histology	9260/3: Ewing sarcoma	T1NOS	N0	M0	None; diagnosed at autopsy	Surgery performed	No radiation and/or cancer-directed surgery	None/Unknown	Yes	15	100	0	0	Localized	Single (never married)	342	974	3995	6604	534	448	4399	103	Alive	Active follow-up	Alive or dead of other cause	Alive or dead due to cancer
19	White	Male	C40.3-Short bones of lower limb and associated joints	Unknown	Positive histology	9260/3: Ewing sarcoma	T1	NX	M1b	None; diagnosed at autopsy	Not recommended	No radiation and/or cancer-directed surgery	None/Unknown	Yes	79	400	999	40	Distant	Single (never married)	342	974	3995	6604	534	448	4399	7	Dead	Active follow-up	Dead (attributable to this cancer dx)	Alive or dead due to cancer
15	Other (American Indian/AK Native, Asian/Pacific Islander)	Female	C41.4-Pelvic bones, sacrum, coccyx and associated joints	Unknown	Positive histology	9260/3: Ewing sarcoma	T2	N0	M1a	Non-primary surgical procedure to distant site	Surgery performed	Radiation after surgery	Beam radiation	Yes	93	400	0	30	Distant	Single (never married)	218	923	2533	5388	628	602	3597	28	Dead	Active follow-up	Dead (attributable to this cancer dx)	Alive or dead due to cancer
14	White	Male	C41.0-Bones of skull and face and associated joints	Unknown	Positive histology	9260/3: Ewing sarcoma	T1	N0	M0	None; diagnosed at autopsy	Not recommended	No radiation and/or cancer-directed surgery	Beam radiation	Yes	30	400	0	0	Regional	Single (never married)	361	1628	1556	4425	878	831	2833	100	Alive	Active follow-up	Alive or dead of other cause	Alive or dead due to cancer
15	White	Male	C40.2-Long bones of lower limb and associated joints	Unknown	Positive histology	9260/3: Ewing sarcoma	TX	N0	M0	None; diagnosed at autopsy	Surgery performed	No radiation and/or cancer-directed surgery	None/Unknown	Yes	999	100	0	0	Localized	Single (never married)	169	790	2703	5136	512	571	3545	75	Dead	Active follow-up	Alive or dead of other cause	Dead (attributable to causes other than this cancer dx)
45	White	Female	C40.2-Long bones of lower limb and associated joints	Unknown	Positive histology	9261/3: Adamantinoma of long bones	T3	N0	M0	None; diagnosed at autopsy	Surgery performed	No radiation and/or cancer-directed surgery	None/Unknown	No/Unknown	15	820	0	0	Distant	Single (never married)	169	790	2703	5136	512	571	3545	96	Alive	Active follow-up	Alive or dead of other cause	Alive or dead due to cancer
15	White	Female	C40.0-Long bones: upper limb, scapula, and associated joints	Unknown	Positive histology	9260/3: Ewing sarcoma	TX	N0	M0	None; diagnosed at autopsy	Surgery performed	No radiation and/or cancer-directed surgery	None/Unknown	Yes	999	300	0	0	Localized	Single (never married)	342	974	3995	6604	534	448	4399	30	Dead	Active follow-up	Dead (attributable to this cancer dx)	Alive or dead due to cancer
24	White	Female	C41.4-Pelvic bones, sacrum, coccyx and associated joints	Unknown	Positive histology	9260/3: Ewing sarcoma	T1	N0	M0	None; diagnosed at autopsy	Surgery performed	Radiation after surgery	Beam radiation	Yes	73	400	0	0	Regional	Single (never married)	260	1082	2445	6073	485	498	3476	92	Alive	Active follow-up	Alive or dead of other cause	Alive or dead due to cancer
17	Other (American Indian/AK Native, Asian/Pacific Islander)	Female	C49.2-Conn, subcutaneous, other soft tis: lower limb, hip	Undifferentiated; anaplastic; Grade IV	Positive histology	9260/3: Ewing sarcoma	T2a	N0	M1	None; diagnosed at autopsy	Surgery performed	No radiation and/or cancer-directed surgery	Refused	No/Unknown	140	110	0	40	Distant	Single (never married)	136	843	2838	4542	719	671	3480	4	Dead	Active follow-up	Alive or dead of other cause	Dead (attributable to causes other than this cancer dx)
14	White	Female	C41.3-Rib, sternum, clavicle and associated joints	Unknown	Positive histology	9260/3: Ewing sarcoma	T1	N0	M0	None; diagnosed at autopsy	Not recommended	No radiation and/or cancer-directed surgery	None/Unknown	Yes	51	400	0	0	Regional	Single (never married)	392	1250	2723	4933	782	738	3247	91	Alive	Active follow-up	Alive or dead of other cause	Alive or dead due to cancer
3	White	Male	C49.2-Conn, subcutaneous, other soft tis: lower limb, hip	Unknown	Positive histology	9260/3: Ewing sarcoma	T1a	N0	M0	None; diagnosed at autopsy	Surgery performed	No radiation and/or cancer-directed surgery	None/Unknown	Yes	991	110	0	0	Localized	Single (never married)	336	1313	2059	5210	748	645	3137	94	Alive	Active follow-up	Alive or dead of other cause	Alive or dead due to cancer
9	White	Male	C41.3-Rib, sternum, clavicle and associated joints	Unknown	Positive histology	9260/3: Ewing sarcoma	T1	N0	M0	None; diagnosed at autopsy	Not recommended	No radiation and/or cancer-directed surgery	None/Unknown	Yes	75	400	0	0	Regional	Single (never married)	336	1313	2059	5210	748	645	3137	90	Alive	Active follow-up	Alive or dead of other cause	Alive or dead due to cancer
46	White	Female	C40.2-Long bones of lower limb and associated joints	Unknown	Positive histology	9261/3: Adamantinoma of long bones	TX	N0	M0	None; diagnosed at autopsy	Surgery performed	No radiation and/or cancer-directed surgery	None/Unknown	No/Unknown	999	100	0	0	Localized	Married (including common law)	260	1082	2445	6073	485	498	3476	95	Alive	Active follow-up	Alive or dead of other cause	Alive or dead due to cancer
22	White	Female	C49.4-Conn, subcutaneous, other soft tis: abdomen	Unknown	Positive histology	9260/3: Ewing sarcoma	TX	N1	M1	Non-primary surgical procedure to distant lymph node(s)	Not recommended	No radiation and/or cancer-directed surgery	None/Unknown	Yes	999	620	100	50	Distant	Single (never married)	342	974	3995	6604	534	448	4399	6	Dead	Active follow-up	Dead (attributable to this cancer dx)	Alive or dead due to cancer
14	White	Male	C71.2-Temporal lobe	Unknown	Positive histology	9260/3: Ewing sarcoma	NA	NA	NA	None; diagnosed at autopsy	Surgery performed	Radiation after surgery	Beam radiation	Yes	54	600	988	0	Unstaged	Single (never married)	336	1313	2059	5210	748	645	3137	90	Alive	Active follow-up	Alive or dead of other cause	Alive or dead due to cancer
33	Other (American Indian/AK Native, Asian/Pacific Islander)	Male	C40.2-Long bones of lower limb and associated joints	Unknown	Positive histology	9260/3: Ewing sarcoma	T3	NX	M0	None; diagnosed at autopsy	Surgery performed	No radiation and/or cancer-directed surgery	None/Unknown	Yes	257	820	999	0	Distant	Married (including common law)	260	1082	2445	6073	485	498	3476	10	Dead	Active follow-up	Dead (attributable to this cancer dx)	Alive or dead due to cancer
28	White	Female	C49.6-Conn, subcutaneous, other soft tis: trunk, NOS	Unknown	Positive histology	9260/3: Ewing sarcoma	T1b	N0	M0	None; diagnosed at autopsy	Not recommended	No radiation and/or cancer-directed surgery	Beam radiation	Yes	44	120	0	0	Localized	Married (including common law)	336	1313	2059	5210	748	645	3137	47	Alive	Active follow-up	Alive or dead of other cause	Alive or dead due to cancer
18	White	Female	C40.0-Long bones: upper limb, scapula, and associated joints	Unknown	Positive histology	9260/3: Ewing sarcoma	TX	NX	M1b	Non-primary surgical procedure to distant site	Not recommended	Radiation after surgery	Beam radiation	Yes	93	999	999	40	Distant	Married (including common law)	342	974	3995	6604	534	448	4399	10	Alive	Active follow-up	Alive or dead of other cause	Alive or dead due to cancer
21	White	Male	C41.4-Pelvic bones, sacrum, coccyx and associated joints	Unknown	Positive histology	9260/3: Ewing sarcoma	T2	N0	M1b	None; diagnosed at autopsy	Not recommended, contraindicated due to other cond; autopsy only (1973-2002)	No radiation and/or cancer-directed surgery	Beam radiation	Yes	120	600	0	40	Distant	Single (never married)	336	1313	2059	5210	748	645	3137	14	Dead	Active follow-up	Dead (attributable to this cancer dx)	Alive or dead due to cancer
3	White	Female	C49.5-Conn, subcutaneous, other soft tis: pelvis	Unknown	Positive histology	9260/3: Ewing sarcoma	T1b	N0	M0	None; diagnosed at autopsy	Surgery performed	Radiation after surgery	Beam radiation	Yes	32	600	0	0	Regional	Single (never married)	342	974	3995	6604	534	448	4399	81	Alive	Active follow-up	Alive or dead of other cause	Alive or dead due to cancer
22	White	Male	C49.6-Conn, subcutaneous, other soft tis: trunk, NOS	Undifferentiated; anaplastic; Grade IV	Positive histology	9260/3: Ewing sarcoma	T2b	N0	M0	None; diagnosed at autopsy	Surgery performed	No radiation and/or cancer-directed surgery	None/Unknown	Yes	69	620	0	0	Regional	Single (never married)	260	1082	2445	6073	485	498	3476	68	Dead	Active follow-up	Dead (attributable to this cancer dx)	Alive or dead due to cancer
12	White	Male	C41.1-Mandible	Unknown	Positive histology	9260/3: Ewing sarcoma	T1	N0	M0	None; diagnosed at autopsy	Surgery performed	No radiation and/or cancer-directed surgery	None/Unknown	Yes	28	100	0	0	Localized	Single (never married)	342	974	3995	6604	534	448	4399	77	Alive	Active follow-up	Alive or dead of other cause	Alive or dead due to cancer
20	White	Male	C41.3-Rib, sternum, clavicle and associated joints	Unknown	Positive histology	9260/3: Ewing sarcoma	T2	N0	M1b	None; diagnosed at autopsy	Surgery performed	Radiation after surgery	Beam radiation	Yes	81	400	0	40	Distant	Married (including common law)	169	790	2703	5136	512	571	3545	57	Dead	Active follow-up	Dead (attributable to this cancer dx)	Alive or dead due to cancer
55	White	Male	C41.3-Rib, sternum, clavicle and associated joints	Unknown	Positive histology	9260/3: Ewing sarcoma	T2	N0	M0	None; diagnosed at autopsy	Surgery performed	Radiation after surgery	Beam radiation	Yes	170	800	0	0	Distant	Single (never married)	342	974	3995	6604	534	448	4399	72	Alive	Active follow-up	Alive or dead of other cause	Alive or dead due to cancer
11	White	Male	C41.4-Pelvic bones, sacrum, coccyx and associated joints	Unknown	Positive histology	9260/3: Ewing sarcoma	TX	N0	M0	None; diagnosed at autopsy	Surgery performed	Radiation after surgery	Beam radiation	Yes	999	600	0	0	Regional	Single (never married)	342	974	3995	6604	534	448	4399	69	Alive	Active follow-up	Alive or dead of other cause	Alive or dead due to cancer
13	White	Male	C41.3-Rib, sternum, clavicle and associated joints	Unknown	Positive histology	9260/3: Ewing sarcoma	TX	N0	M0	None; diagnosed at autopsy	Surgery performed	No radiation and/or cancer-directed surgery	None/Unknown	Yes	999	300	0	0	Localized	Single (never married)	260	1082	2445	6073	485	498	3476	74	Alive	Active follow-up	Alive or dead of other cause	Alive or dead due to cancer
13	White	Female	C40.2-Long bones of lower limb and associated joints	Unknown	Positive histology	9260/3: Ewing sarcoma	T1	N0	M0	None; diagnosed at autopsy	Surgery performed	No radiation and/or cancer-directed surgery	None/Unknown	Yes	72	400	0	0	Regional	Single (never married)	342	974	3995	6604	534	448	4399	72	Alive	Active follow-up	Alive or dead of other cause	Alive or dead due to cancer
47	White	Female	C40.3-Short bones of lower limb and associated joints	Unknown	Positive histology	9260/3: Ewing sarcoma	T1	N0	M1a	Non-primary surgical procedure to distant site	Not recommended	No radiation and/or cancer-directed surgery	None/Unknown	Yes	31	400	0	30	Distant	Married (including common law)	60	558	4019	5184	598	317	3376	31	Dead	Active follow-up	Dead (attributable to this cancer dx)	Alive or dead due to cancer
5	White	Male	C41.4-Pelvic bones, sacrum, coccyx and associated joints	Unknown	Positive histology	9260/3: Ewing sarcoma	T2	N0	M0	None; diagnosed at autopsy	Not recommended, contraindicated due to other cond; autopsy only (1973-2002)	No radiation and/or cancer-directed surgery	Beam radiation	Yes	88	400	0	0	Regional	Single (never married)	342	974	3995	6604	534	448	4399	67	Alive	Active follow-up	Alive or dead of other cause	Alive or dead due to cancer
31	White	Female	C41.4-Pelvic bones, sacrum, coccyx and associated joints	Unknown	Positive histology	9260/3: Ewing sarcoma	T1	N0	M0	None; diagnosed at autopsy	Not recommended	No radiation and/or cancer-directed surgery	Beam radiation	Yes	77	400	0	0	Regional	Single (never married)	260	1082	2445	6073	485	498	3476	37	Dead	Active follow-up	Dead (attributable to this cancer dx)	Alive or dead due to cancer
27	White	Male	C40.2-Long bones of lower limb and associated joints	Unknown	Positive histology	9260/3: Ewing sarcoma	T2	N0	M0	None; diagnosed at autopsy	Not recommended	No radiation and/or cancer-directed surgery	Beam radiation	Yes	102	400	0	0	Regional	Single (never married)	342	974	3995	6604	534	448	4399	16	Alive	Active follow-up	Alive or dead of other cause	Alive or dead due to cancer
5	White	Female	C40.2-Long bones of lower limb and associated joints	Unknown	Positive histology	9260/3: Ewing sarcoma	T1	N0	M0	None; diagnosed at autopsy	Surgery performed	No radiation and/or cancer-directed surgery	None/Unknown	Yes	60	100	0	0	Localized	Single (never married)	218	923	2533	5388	628	602	3597	63	Alive	Active follow-up	Alive or dead of other cause	Alive or dead due to cancer
6	White	Male	C41.4-Pelvic bones, sacrum, coccyx and associated joints	Unknown	Positive histology	9260/3: Ewing sarcoma	T1	N0	M1a	Any combo of sur proc to oth rg, dis lym nd, and/or dis site	Surgery performed	Radiation after surgery	Beam radiation	Yes	80	600	0	30	Distant	Single (never married)	392	1250	2723	4933	782	738	3247	63	Alive	Active follow-up	Alive or dead of other cause	Alive or dead due to cancer
17	White	Male	C40.2-Long bones of lower limb and associated joints	Unknown	Positive histology	9260/3: Ewing sarcoma	TX	N0	M0	None; diagnosed at autopsy	Surgery performed	No radiation and/or cancer-directed surgery	None/Unknown	Yes	999	400	0	0	Regional	Single (never married)	342	974	3995	6604	534	448	4399	58	Alive	Active follow-up	Alive or dead of other cause	Alive or dead due to cancer
22	White	Female	C40.2-Long bones of lower limb and associated joints	Undifferentiated; anaplastic; Grade IV	Positive histology	9260/3: Ewing sarcoma	T2	N0	M0	None; diagnosed at autopsy	Surgery performed	No radiation and/or cancer-directed surgery	None/Unknown	Yes	140	400	0	0	Regional	Single (never married)	550	1605	2076	4835	788	692	2946	56	Alive	Active follow-up	Alive or dead of other cause	Alive or dead due to cancer
13	White	Male	C41.4-Pelvic bones, sacrum, coccyx and associated joints	Unknown	Positive histology	9260/3: Ewing sarcoma	T2	N0	M0	None; diagnosed at autopsy	Surgery performed	Radiation after surgery	Beam radiation	Yes	96	600	0	0	Regional	Single (never married)	218	923	2533	5388	628	602	3597	51	Alive	Active follow-up	Alive or dead of other cause	Alive or dead due to cancer
26	White	Female	C40.2-Long bones of lower limb and associated joints	Undifferentiated; anaplastic; Grade IV	Positive histology	9260/3: Ewing sarcoma	T1	N0	M0	None; diagnosed at autopsy	Surgery performed	Radiation after surgery	Beam radiation	Yes	71	600	0	0	Regional	Divorced	336	1313	2059	5210	748	645	3137	50	Alive	Active follow-up	Alive or dead of other cause	Alive or dead due to cancer
22	White	Male	C41.4-Pelvic bones, sacrum, coccyx and associated joints	Unknown	Positive histology	9260/3: Ewing sarcoma	TX	N0	M0	None; diagnosed at autopsy	Surgery performed	Radiation prior to surgery	Beam radiation	Yes	999	300	0	0	Localized	Single (never married)	342	974	3995	6604	534	448	4399	48	Alive	Active follow-up	Alive or dead of other cause	Alive or dead due to cancer
16	Other (American Indian/AK Native, Asian/Pacific Islander)	Male	C40.0-Long bones: upper limb, scapula, and associated joints	Unknown	Positive histology	9260/3: Ewing sarcoma	TX	N0	M0	None; diagnosed at autopsy	Surgery performed	Radiation after surgery	Beam radiation	Yes	999	400	0	0	Regional	Single (never married)	342	974	3995	6604	534	448	4399	28	Dead	Active follow-up	Dead (attributable to this cancer dx)	Alive or dead due to cancer
20	White	Male	C40.2-Long bones of lower limb and associated joints	Unknown	Positive histology	9260/3: Ewing sarcoma	T2	N0	M0	None; diagnosed at autopsy	Surgery performed	No radiation and/or cancer-directed surgery	None/Unknown	Yes	101	350	0	0	Localized	Unknown	271	1050	2984	5503	580	594	3886	44	Alive	Active follow-up	Alive or dead of other cause	Alive or dead due to cancer
10	White	Male	C40.0-Long bones: upper limb, scapula, and associated joints	Unknown	Positive histology	9260/3: Ewing sarcoma	T1	N0	M0	None; diagnosed at autopsy	Surgery performed	No radiation and/or cancer-directed surgery	None/Unknown	Yes	67	100	0	0	Localized	Single (never married)	336	1313	2059	5210	748	645	3137	42	Alive	Active follow-up	Alive or dead of other cause	Alive or dead due to cancer
19	White	Female	C44.5-Skin of trunk	Unknown	Positive histology	9260/3: Ewing sarcoma	NA	NA	NA	None; diagnosed at autopsy	Surgery performed	No radiation and/or cancer-directed surgery	None/Unknown	No/Unknown	999	100	0	0	Localized	Single (never married)	260	1082	2445	6073	485	498	3476	41	Alive	Active follow-up	Alive or dead of other cause	Alive or dead due to cancer
23	White	Female	C49.3-Conn, subcutaneous, other soft tis: thorax	Unknown	Positive histology	9260/3: Ewing sarcoma	T2NOS	N0	M0	None; diagnosed at autopsy	Surgery performed	Radiation prior to surgery	Beam radiation	Yes	80	300	0	0	Localized	Married (including common law)	169	790	2703	5136	512	571	3545	40	Alive	Active follow-up	Alive or dead of other cause	Alive or dead due to cancer
12	White	Female	C41.2-Vertebral column	Unknown	Positive histology	9260/3: Ewing sarcoma	TX	N0	M0	None; diagnosed at autopsy	Not recommended	No radiation and/or cancer-directed surgery	Beam radiation	Yes	999	300	0	0	Localized	Single (never married)	260	1082	2445	6073	485	498	3476	39	Alive	Active follow-up	Alive or dead of other cause	Alive or dead due to cancer
12	White	Male	C40.2-Long bones of lower limb and associated joints	Unknown	Positive histology	9260/3: Ewing sarcoma	T2	N0	M0	None; diagnosed at autopsy	Surgery performed	No radiation and/or cancer-directed surgery	None/Unknown	Yes	93	300	0	0	Localized	Single (never married)	342	974	3995	6604	534	448	4399	41	Alive	Active follow-up	Alive or dead of other cause	Alive or dead due to cancer
18	White	Male	C40.2-Long bones of lower limb and associated joints	Unknown	Positive histology	9260/3: Ewing sarcoma	T1	N0	M0	None; diagnosed at autopsy	Surgery performed	No radiation and/or cancer-directed surgery	None/Unknown	Yes	75	400	0	0	Regional	Single (never married)	271	1050	2984	5503	580	594	3886	31	Alive	Active follow-up	Alive or dead of other cause	Alive or dead due to cancer
24	Other (American Indian/AK Native, Asian/Pacific Islander)	Male	C34.1-Upper lobe, lung	Undifferentiated; anaplastic; Grade IV	Positive histology	9260/3: Ewing sarcoma	NA	NA	NA	None; diagnosed at autopsy	Surgery performed	Radiation after surgery	Beam radiation	Yes	151	700	0	0	Regional	Married (including common law)	336	1313	2059	5210	748	645	3137	31	Alive	Active follow-up	Alive or dead of other cause	Alive or dead due to cancer
27	White	Female	C54.2-Myometrium	Unknown	Positive histology	9260/3: Ewing sarcoma	NA	NA	NA	None; diagnosed at autopsy	Surgery performed	No radiation and/or cancer-directed surgery	None/Unknown	Yes	150	140	0	0	Localized	Single (never married)	342	974	3995	6604	534	448	4399	30	Alive	Active follow-up	Alive or dead of other cause	Alive or dead due to cancer
18	White	Male	C41.4-Pelvic bones, sacrum, coccyx and associated joints	Undifferentiated; anaplastic; Grade IV	Positive histology	9260/3: Ewing sarcoma	T2	N0	M0	None; diagnosed at autopsy	Not recommended	No radiation and/or cancer-directed surgery	Beam radiation	Yes	87	350	0	0	Localized	Single (never married)	342	974	3995	6604	534	448	4399	30	Alive	Active follow-up	Alive or dead of other cause	Alive or dead due to cancer
18	White	Male	C41.4-Pelvic bones, sacrum, coccyx and associated joints	Undifferentiated; anaplastic; Grade IV	Positive histology	9260/3: Ewing sarcoma	T1	N0	M1a	None; diagnosed at autopsy	Surgery performed	Radiation after surgery	Beam radiation	Yes	53	400	0	30	Distant	Single (never married)	342	974	3995	6604	534	448	4399	25	Dead	Active follow-up	Dead (attributable to this cancer dx)	Alive or dead due to cancer
15	White	Female	C41.0-Bones of skull and face and associated joints	Unknown	Positive histology	9260/3: Ewing sarcoma	T1	N0	M0	None; diagnosed at autopsy	Surgery performed	Radiation after surgery	Beam radiation	Yes	42	400	0	0	Regional	Single (never married)	342	974	3995	6604	534	448	4399	27	Alive	Active follow-up	Alive or dead of other cause	Alive or dead due to cancer
19	Other (American Indian/AK Native, Asian/Pacific Islander)	Male	C41.4-Pelvic bones, sacrum, coccyx and associated joints	Unknown	Positive histology	9260/3: Ewing sarcoma	T2	N0	M0	None; diagnosed at autopsy	Not recommended	No radiation and/or cancer-directed surgery	Beam radiation	Yes	123	400	0	0	Regional	Single (never married)	218	923	2533	5388	628	602	3597	15	Dead	Active follow-up	Dead (attributable to this cancer dx)	Alive or dead due to cancer
19	White	Male	C41.4-Pelvic bones, sacrum, coccyx and associated joints	Unknown	Positive histology	9260/3: Ewing sarcoma	T2	N0	M0	None; diagnosed at autopsy	Surgery performed	Radiation prior to surgery	Beam radiation	Yes	85	400	0	0	Regional	Single (never married)	260	1082	2445	6073	485	498	3476	20	Dead	Active follow-up	Dead (attributable to this cancer dx)	Alive or dead due to cancer
8	White	Female	C49.3-Conn, subcutaneous, other soft tis: thorax	Unknown	Positive histology	9260/3: Ewing sarcoma	T1b	N0	M0	None; diagnosed at autopsy	Surgery performed	No radiation and/or cancer-directed surgery	None/Unknown	Yes	23	120	0	0	Localized	Single (never married)	218	923	2533	5388	628	602	3597	24	Alive	Active follow-up	Alive or dead of other cause	Alive or dead due to cancer
23	White	Male	C40.2-Long bones of lower limb and associated joints	Unknown	Positive histology	9260/3: Ewing sarcoma	TX	N0	M0	None; diagnosed at autopsy	Surgery performed	Radiation prior to surgery	Beam radiation	Yes	999	300	0	0	Localized	Single (never married)	169	790	2703	5136	512	571	3545	22	Alive	Active follow-up	Alive or dead of other cause	Alive or dead due to cancer
14	White	Female	C40.2-Long bones of lower limb and associated joints	Unknown	Positive histology	9260/3: Ewing sarcoma	T2	N0	M0	None; diagnosed at autopsy	Surgery performed	No radiation and/or cancer-directed surgery	None/Unknown	Yes	162	400	0	0	Regional	Single (never married)	342	974	3995	6604	534	448	4399	21	Alive	Active follow-up	Alive or dead of other cause	Alive or dead due to cancer
6	White	Male	C41.2-Vertebral column	Unknown	Positive histology	9260/3: Ewing sarcoma	T1	N0	M0	None; diagnosed at autopsy	Surgery performed	Radiation after surgery	Beam radiation	Yes	35	300	0	0	Localized	Single (never married)	336	1313	2059	5210	748	645	3137	18	Alive	Active follow-up	Alive or dead of other cause	Alive or dead due to cancer
39	Other (American Indian/AK Native, Asian/Pacific Islander)	Female	C49.4-Conn, subcutaneous, other soft tis: abdomen	Unknown	Positive histology	9260/3: Ewing sarcoma	T2b	N0	M1	None; diagnosed at autopsy	Surgery performed	Radiation after surgery	Beam radiation	Yes	201	320	0	40	Distant	Married (including common law)	342	974	3995	6604	534	448	4399	20	Alive	Active follow-up	Alive or dead of other cause	Alive or dead due to cancer
12	White	Male	C40.0-Long bones: upper limb, scapula, and associated joints	Unknown	Positive histology	9260/3: Ewing sarcoma	T1	N0	M0	None; diagnosed at autopsy	Surgery performed	No radiation and/or cancer-directed surgery	Recommended, unknown if administered	Yes	50	400	0	0	Regional	Single (never married)	336	1313	2059	5210	748	645	3137	19	Alive	Active follow-up	Alive or dead of other cause	Alive or dead due to cancer
34	White	Female	C49.4-Conn, subcutaneous, other soft tis: abdomen	Unknown	Positive histology	9260/3: Ewing sarcoma	T2b	N0	M0	None; diagnosed at autopsy	Surgery performed	No radiation and/or cancer-directed surgery	None/Unknown	Yes	52	620	0	0	Regional	Unmarried or Domestic Partner	271	1050	2984	5503	580	594	3886	18	Alive	Active follow-up	Alive or dead of other cause	Alive or dead due to cancer
17	White	Male	C40.2-Long bones of lower limb and associated joints	Unknown	Positive histology	9261/3: Adamantinoma of long bones	TX	NX	MX	None; diagnosed at autopsy	Not recommended	No radiation and/or cancer-directed surgery	None/Unknown	No/Unknown	999	999	999	99	Unstaged	Single (never married)	342	974	3995	6604	534	448	4399	16	Alive	Active follow-up	Alive or dead of other cause	Alive or dead due to cancer
10	Black	Female	C40.2-Long bones of lower limb and associated joints	Unknown	Positive histology	9260/3: Ewing sarcoma	TX	N0	M0	None; diagnosed at autopsy	Surgery performed	No radiation and/or cancer-directed surgery	None/Unknown	Yes	999	300	0	0	Localized	Single (never married)	342	974	3995	6604	534	448	4399	16	Alive	Active follow-up	Alive or dead of other cause	Alive or dead due to cancer
18	White	Male	C41.4-Pelvic bones, sacrum, coccyx and associated joints	Unknown	Positive histology	9260/3: Ewing sarcoma	T2	N0	M1b	None; diagnosed at autopsy	Not recommended	No radiation and/or cancer-directed surgery	Beam radiation	Yes	97	400	0	40	Distant	Single (never married)	260	1082	2445	6073	485	498	3476	15	Alive	Active follow-up	Alive or dead of other cause	Alive or dead due to cancer
40	White	Male	C34.1-Upper lobe, lung	Unknown	Positive histology	9260/3: Ewing sarcoma	NA	NA	NA	None; diagnosed at autopsy	Surgery performed	No radiation and/or cancer-directed surgery	None/Unknown	Yes	61	100	0	0	Localized	Married (including common law)	336	1313	2059	5210	748	645	3137	14	Alive	Active follow-up	Alive or dead of other cause	Alive or dead due to cancer
46	White	Male	C49.5-Conn, subcutaneous, other soft tis: pelvis	Undifferentiated; anaplastic; Grade IV	Positive histology	9260/3: Ewing sarcoma	T2b	N0	M1	None; diagnosed at autopsy	Not recommended, contraindicated due to other cond; autopsy only (1973-2002)	No radiation and/or cancer-directed surgery	Beam radiation	No/Unknown	148	600	0	40	Distant	Single (never married)	342	974	3995	6604	534	448	4399	8	Dead	Active follow-up	Dead (attributable to this cancer dx)	Alive or dead due to cancer
14	White	Female	C41.4-Pelvic bones, sacrum, coccyx and associated joints	Unknown	Positive histology	9260/3: Ewing sarcoma	T2	N0	M0	None; diagnosed at autopsy	Recommended, unknown if performed	No radiation and/or cancer-directed surgery	Beam radiation	Yes	82	400	0	0	Regional	Single (never married)	260	1082	2445	6073	485	498	3476	11	Alive	Active follow-up	Alive or dead of other cause	Alive or dead due to cancer
11	White	Female	C40.2-Long bones of lower limb and associated joints	Unknown	Positive histology	9260/3: Ewing sarcoma	T2	N0	M0	None; diagnosed at autopsy	Surgery performed	No radiation and/or cancer-directed surgery	None/Unknown	Yes	108	200	0	0	Localized	Single (never married)	342	974	3995	6604	534	448	4399	6	Alive	Active follow-up	Alive or dead of other cause	Alive or dead due to cancer
9	White	Male	C40.2-Long bones of lower limb and associated joints	Unknown	Positive histology	9260/3: Ewing sarcoma	T2	N0	M0	None; diagnosed at autopsy	Surgery performed	No radiation and/or cancer-directed surgery	None/Unknown	Yes	140	400	0	0	Regional	Single (never married)	336	1313	2059	5210	748	645	3137	5	Alive	Active follow-up	Alive or dead of other cause	Alive or dead due to cancer
23	White	Female	C64.9-Kidney, NOS	Unknown	Positive histology	9260/3: Ewing sarcoma	NA	NA	NA	None; diagnosed at autopsy	Surgery performed	No radiation and/or cancer-directed surgery	None/Unknown	No/Unknown	200	601	200	40	Distant	Single (never married)	218	923	2533	5388	628	602	3597	6	Alive	Active follow-up	Alive or dead of other cause	Alive or dead due to cancer
56	White	Male	C40.1-Short bones of upper limb and associated joints	Unknown	Positive histology	9260/3: Ewing sarcoma	T2	N1	M0	None; diagnosed at autopsy	Surgery performed	Radiation after surgery	Beam radiation	Yes	140	600	100	0	Regional	Divorced	342	974	3995	6604	534	448	4399	4	Alive	Active follow-up	Alive or dead of other cause	Alive or dead due to cancer
27	White	Male	C25.1-Body of pancreas	Unknown	Positive exfoliative cytology, no positive histology	9260/3: Ewing sarcoma	NA	NA	NA	None; diagnosed at autopsy	Not recommended	No radiation and/or cancer-directed surgery	None/Unknown	Yes	999	560	800	40	Distant	Single (never married)	342	974	3995	6604	534	448	4399	3	Alive	Active follow-up	Alive or dead of other cause	Alive or dead due to cancer
12	White	Female	C41.2-Vertebral column	Unknown	Positive histology	9260/3: Ewing sarcoma	T1	N0	M0	None; diagnosed at autopsy	Not recommended	No radiation and/or cancer-directed surgery	Beam radiation	Yes	33	400	0	0	Regional	Single (never married)	342	974	3995	6604	534	448	4399	1	Alive	Active follow-up	Alive or dead of other cause	Alive or dead due to cancer
12	White	Male	C41.3-Rib, sternum, clavicle and associated joints	Unknown	Positive histology	9260/3: Ewing sarcoma	T1	N0	M0	None; diagnosed at autopsy	Surgery performed	No radiation and/or cancer-directed surgery	None/Unknown	Yes	44	400	0	0	Regional	Single (never married)	336	1313	2059	5210	748	645	3137	1	Alive	Active follow-up	Alive or dead of other cause	Alive or dead due to cancer
15	Other (American Indian/AK Native, Asian/Pacific Islander)	Female	C52.9-Vagina, NOS	Poorly differentiated; Grade III	Positive histology	9260/3: Ewing sarcoma	NA	NA	NA	None; diagnosed at autopsy	Surgery performed	No radiation and/or cancer-directed surgery	None/Unknown	Yes	52	620	0	0	Blank(s)	Single (never married)	336	1313	2059	5210	748	645	3137	0	Alive	Active follow-up	Alive or dead of other cause	Alive or dead due to cancer
50	White	Male	C41.9-Bone, NOS	Unknown	Positive histology	9260/3: Ewing sarcoma	T2	N0	M1b	None; diagnosed at autopsy	Not recommended	No radiation and/or cancer-directed surgery	Beam radiation	Yes	130	300	0	40	Distant	Divorced	392	1250	2723	4933	782	738	3247	0	Alive	Active follow-up	Alive or dead of other cause	Alive or dead due to cancer
37	White	Female	C64.9-Kidney, NOS	Unknown	Positive histology	9260/3: Ewing sarcoma	NA	NA	NA	None; diagnosed at autopsy	Surgery performed	No radiation and/or cancer-directed surgery	None/Unknown	Yes	160	650	0	0	Regional	Married (including common law)	342	974	3995	6604	534	448	4399	0	Alive	Active follow-up	Alive or dead of other cause	Alive or dead due to cancer
39	Other (American Indian/AK Native, Asian/Pacific Islander)	Male	C50.9-Breast, NOS	Unknown	Positive histology	9260/3: Ewing sarcoma	NA	NA	NA	None; diagnosed at autopsy	Surgery performed	No radiation and/or cancer-directed surgery	None/Unknown	No/Unknown	50	100	0	0	Localized	Married (including common law)	358	1317	2741	5447	573	456	3363	6	Dead	Active follow-up	N/A not first tumor	N/A not first tumor
12	White	Female	C41.2-Vertebral column	Unknown	Positive histology	9260/3: Ewing sarcoma	TX	N0	M0	None; diagnosed at autopsy	Surgery performed	Radiation after surgery	Beam radiation	Yes	999	600	0	0	Regional	Single (never married)	173	1140	2376	3717	1307	528	2804	119	Alive	Active follow-up	Alive or dead of other cause	Alive or dead due to cancer
23	White	Female	C34.3-Lower lobe, lung	Unknown	Positive histology	9260/3: Ewing sarcoma	NA	NA	NA	None; diagnosed at autopsy	Surgery performed	Radiation prior to surgery	Beam radiation	Yes	58	300	0	0	Localized	Single (never married)	358	1317	2741	5447	573	456	3363	110	Alive	Active follow-up	Alive or dead of other cause	Alive or dead due to cancer
19	White	Female	C40.0-Long bones: upper limb, scapula, and associated joints	Unknown	Positive histology	9260/3: Ewing sarcoma	T1	N0	M0	None; diagnosed at autopsy	Surgery performed	No radiation and/or cancer-directed surgery	None/Unknown	Yes	12	300	0	0	Localized	Single (never married)	291	1222	1949	4942	584	525	2880	43	Dead	Active follow-up	Alive or dead of other cause	Dead (attributable to causes other than this cancer dx)
30	White	Male	C40.2-Long bones of lower limb and associated joints	Unknown	Positive histology	9260/3: Ewing sarcoma	T2	NX	M0	None; diagnosed at autopsy	Surgery performed	No radiation and/or cancer-directed surgery	None/Unknown	Yes	101	300	999	0	Localized	Married (including common law)	358	1317	2741	5447	573	456	3363	9	Dead	Active follow-up	Dead (attributable to this cancer dx)	Alive or dead due to cancer
11	White	Female	C41.4-Pelvic bones, sacrum, coccyx and associated joints	Unknown	Positive histology	9260/3: Ewing sarcoma	TX	N0	M0	None; diagnosed at autopsy	Surgery performed	Radiation after surgery	Beam radiation	Yes	999	400	0	0	Regional	Single (never married)	255	913	3146	5020	677	477	3731	103	Alive	Active follow-up	Alive or dead of other cause	Alive or dead due to cancer
7	White	Female	C41.2-Vertebral column	Unknown	Positive histology	9260/3: Ewing sarcoma	TX	N0	M0	None; diagnosed at autopsy	Surgery performed	Radiation after surgery	Beam radiation	Yes	999	300	0	0	Localized	Single (never married)	358	1317	2741	5447	573	456	3363	106	Alive	Active follow-up	Alive or dead of other cause	Alive or dead due to cancer
70	White	Male	C41.4-Pelvic bones, sacrum, coccyx and associated joints	Unknown	Positive histology	9260/3: Ewing sarcoma	T1	N0	M1b	None; diagnosed at autopsy	Recommended but not performed, unknown reason	No radiation and/or cancer-directed surgery	Beam radiation	Yes	49	200	0	40	Distant	Single (never married)	157	775	2878	5833	401	440	3537	18	Dead	Active follow-up	Dead (attributable to this cancer dx)	Alive or dead due to cancer
20	White	Female	C49.3-Conn, subcutaneous, other soft tis: thorax	Unknown	Positive histology	9260/3: Ewing sarcoma	T2b	N0	M0	None; diagnosed at autopsy	Surgery performed	Radiation prior to surgery	Beam radiation	Yes	90	620	0	0	Regional	Single (never married)	157	775	2878	5833	401	440	3537	51	Dead	Active follow-up	Dead (attributable to this cancer dx)	Alive or dead due to cancer
15	White	Male	C41.2-Vertebral column	Unknown	Positive histology	9260/3: Ewing sarcoma	TX	N0	M0	None; diagnosed at autopsy	Not recommended	No radiation and/or cancer-directed surgery	Beam radiation	Yes	999	400	0	0	Regional	Single (never married)	358	1317	2741	5447	573	456	3363	100	Alive	Active follow-up	Alive or dead of other cause	Alive or dead due to cancer
27	White	Male	C40.2-Long bones of lower limb and associated joints	Unknown	Positive histology	9260/3: Ewing sarcoma	T2	N0	M1b	None; diagnosed at autopsy	Not recommended	No radiation and/or cancer-directed surgery	Beam radiation	Yes	82	100	0	40	Distant	Married (including common law)	1505	3037	1394	3167	2691	1506	3476	102	Alive	Active follow-up	Alive or dead of other cause	Alive or dead due to cancer
35	White	Male	C40.2-Long bones of lower limb and associated joints	Undifferentiated; anaplastic; Grade IV	Positive histology	9260/3: Ewing sarcoma	T2	N0	M1a	None; diagnosed at autopsy	Surgery performed	Radiation after surgery	Beam radiation	Yes	92	400	0	30	Distant	Married (including common law)	244	1748	2293	3910	1087	881	3075	10	Alive	Active follow-up	N/A not first tumor	N/A not first tumor
0	White	Male	C49.3-Conn, subcutaneous, other soft tis: thorax	Unknown	Positive histology	9260/3: Ewing sarcoma	TX	N0	M1	None; diagnosed at autopsy	Surgery performed	Radiation after surgery	Beam radiation	Yes	999	600	0	40	Distant	Single (never married)	157	775	2878	5833	401	440	3537	99	Alive	Active follow-up	Alive or dead of other cause	Alive or dead due to cancer
36	White	Male	C40.2-Long bones of lower limb and associated joints	Unknown	Positive histology	9260/3: Ewing sarcoma	T2	N0	M0	None; diagnosed at autopsy	Surgery performed	Radiation after surgery	Beam radiation	Yes	118	600	0	0	Regional	Married (including common law)	358	1317	2741	5447	573	456	3363	12	Dead	Active follow-up	Dead (attributable to this cancer dx)	Alive or dead due to cancer
20	White	Female	C48.0-Retroperitoneum	Unknown	Positive histology	9260/3: Ewing sarcoma	T2b	NX	M1	None; diagnosed at autopsy	Surgery performed	Radiation after surgery	Beam radiation	Yes	209	600	999	40	Distant	Single (never married)	358	1317	2741	5447	573	456	3363	19	Dead	Active follow-up	Dead (attributable to this cancer dx)	Alive or dead due to cancer
16	White	Male	C41.3-Rib, sternum, clavicle and associated joints	Unknown	Positive histology	9260/3: Ewing sarcoma	T2	N1	M1b	None; diagnosed at autopsy	Not recommended	Radiation after surgery	Beam radiation	Yes	100	400	100	40	Distant	Single (never married)	255	913	3146	5020	677	477	3731	33	Dead	Active follow-up	Dead (attributable to this cancer dx)	Alive or dead due to cancer
31	White	Male	C49.0-Conn, subcutaneous, other soft tis: head, face, neck	Undifferentiated; anaplastic; Grade IV	Positive histology	9260/3: Ewing sarcoma	T1NOS	N1	M0	None; diagnosed at autopsy	Surgery performed	Radiation after surgery	Beam radiation	Yes	20	100	100	0	Regional	Married (including common law)	358	1317	2741	5447	573	456	3363	76	Dead	Active follow-up	Dead (attributable to this cancer dx)	Alive or dead due to cancer
19	White	Male	C41.2-Vertebral column	Unknown	Positive histology	9260/3: Ewing sarcoma	TX	NX	M0	None; diagnosed at autopsy	Surgery performed	Radiation after surgery	Beam radiation	Yes	60	999	999	0	Unstaged	Single (never married)	157	775	2878	5833	401	440	3537	93	Alive	Active follow-up	Alive or dead of other cause	Alive or dead due to cancer
24	White	Female	C40.2-Long bones of lower limb and associated joints	Unknown	Positive histology	9261/3: Adamantinoma of long bones	T1	N0	M0	None; diagnosed at autopsy	Not recommended	No radiation and/or cancer-directed surgery	None/Unknown	No/Unknown	20	100	0	0	Localized	Single (never married)	358	1317	2741	5447	573	456	3363	95	Alive	Active follow-up	Alive or dead of other cause	Alive or dead due to cancer
20	White	Male	C41.4-Pelvic bones, sacrum, coccyx and associated joints	Unknown	Positive histology	9260/3: Ewing sarcoma	TX	N0	M0	None; diagnosed at autopsy	Not recommended	No radiation and/or cancer-directed surgery	None/Unknown	Yes	999	400	0	0	Regional	Single (never married)	157	775	2878	5833	401	440	3537	18	Dead	Active follow-up	Dead (attributable to this cancer dx)	Alive or dead due to cancer
13	Other (American Indian/AK Native, Asian/Pacific Islander)	Male	C40.2-Long bones of lower limb and associated joints	Unknown	Positive histology	9260/3: Ewing sarcoma	T2	N0	M0	None; diagnosed at autopsy	Surgery performed	No radiation and/or cancer-directed surgery	None/Unknown	Yes	120	400	0	0	Regional	Single (never married)	279	1243	2096	4185	767	548	2775	76	Alive	Active follow-up	Alive or dead of other cause	Alive or dead due to cancer
27	White	Male	C40.2-Long bones of lower limb and associated joints	Unknown	Positive histology	9260/3: Ewing sarcoma	T1	N0	M0	None; diagnosed at autopsy	Surgery performed	No radiation and/or cancer-directed surgery	None/Unknown	Yes	73	300	0	0	Localized	Married (including common law)	214	1416	1525	4011	833	630	2597	75	Alive	Active follow-up	Alive or dead of other cause	Alive or dead due to cancer
15	White	Female	C40.2-Long bones of lower limb and associated joints	Unknown	Positive histology	9260/3: Ewing sarcoma	TX	N0	M0	None; diagnosed at autopsy	Surgery performed	No radiation and/or cancer-directed surgery	None/Unknown	Yes	999	400	0	0	Regional	Single (never married)	247	747	4554	7251	305	281	4039	73	Alive	Active follow-up	Alive or dead of other cause	Alive or dead due to cancer
9	White	Male	C41.3-Rib, sternum, clavicle and associated joints	Unknown	Positive histology	9260/3: Ewing sarcoma	T3	N0	M0	None; diagnosed at autopsy	Surgery performed	Radiation after surgery	Beam radiation	Yes	147	820	0	0	Distant	Single (never married)	358	1317	2741	5447	573	456	3363	73	Alive	Active follow-up	Alive or dead of other cause	Alive or dead due to cancer
9	White	Male	C40.3-Short bones of lower limb and associated joints	Unknown	Positive histology	9260/3: Ewing sarcoma	TX	N0	M1a	None; diagnosed at autopsy	Surgery performed	No radiation and/or cancer-directed surgery	None/Unknown	Yes	999	100	0	30	Distant	Single (never married)	279	1243	2096	4185	767	548	2775	72	Alive	Active follow-up	Alive or dead of other cause	Alive or dead due to cancer
21	White	Male	C40.0-Long bones: upper limb, scapula, and associated joints	Unknown	Positive histology	9260/3: Ewing sarcoma	T2	N0	M1a	None; diagnosed at autopsy	Not recommended	No radiation and/or cancer-directed surgery	None/Unknown	No/Unknown	107	400	0	30	Distant	Single (never married)	358	1317	2741	5447	573	456	3363	35	Alive	Active follow-up	Alive or dead of other cause	Alive or dead due to cancer
9	White	Male	C40.0-Long bones: upper limb, scapula, and associated joints	Unknown	Positive histology	9260/3: Ewing sarcoma	T2	N0	M0	None; diagnosed at autopsy	Surgery performed	No radiation and/or cancer-directed surgery	None/Unknown	Yes	115	400	0	0	Regional	Single (never married)	352	1892	1226	4090	996	892	2569	67	Alive	Active follow-up	Alive or dead of other cause	Alive or dead due to cancer
30	White	Female	C49.4-Conn, subcutaneous, other soft tis: abdomen	Undifferentiated; anaplastic; Grade IV	Positive histology	9260/3: Ewing sarcoma	T2b	N0	M0	None; diagnosed at autopsy	Not recommended	No radiation and/or cancer-directed surgery	Beam radiation	Yes	55	600	0	0	Regional	Married (including common law)	157	775	2878	5833	401	440	3537	52	Alive	Active follow-up	Alive or dead of other cause	Alive or dead due to cancer
14	White	Female	C41.4-Pelvic bones, sacrum, coccyx and associated joints	Unknown	Positive histology	9260/3: Ewing sarcoma	T1	N1	M0	None; diagnosed at autopsy	Not recommended	No radiation and/or cancer-directed surgery	Beam radiation	Yes	60	400	800	0	Regional	Single (never married)	358	1317	2741	5447	573	456	3363	68	Alive	Active follow-up	Alive or dead of other cause	Alive or dead due to cancer
21	White	Male	C41.2-Vertebral column	Poorly differentiated; Grade III	Positive histology	9260/3: Ewing sarcoma	T2	N0	M1a	None; diagnosed at autopsy	Not recommended	No radiation and/or cancer-directed surgery	Beam radiation	Yes	89	400	0	30	Distant	Single (never married)	173	1140	2376	3717	1307	528	2804	60	Alive	Active follow-up	Alive or dead of other cause	Alive or dead due to cancer
12	White	Male	C40.2-Long bones of lower limb and associated joints	Unknown	Positive histology	9260/3: Ewing sarcoma	T2	N0	M0	None; diagnosed at autopsy	Surgery performed	Radiation after surgery	Beam radiation	Yes	95	600	0	0	Regional	Single (never married)	358	1317	2741	5447	573	456	3363	19	Dead	Active follow-up	Dead (attributable to this cancer dx)	Alive or dead due to cancer
14	White	Female	C41.4-Pelvic bones, sacrum, coccyx and associated joints	Unknown	Positive histology	9260/3: Ewing sarcoma	T2	N0	M1b	None; diagnosed at autopsy	Not recommended	No radiation and/or cancer-directed surgery	Beam radiation	Yes	140	300	0	40	Distant	Single (never married)	157	775	2878	5833	401	440	3537	11	Dead	Active follow-up	Dead (attributable to this cancer dx)	Alive or dead due to cancer
6	White	Female	C40.2-Long bones of lower limb and associated joints	Unknown	Positive histology	9260/3: Ewing sarcoma	T2	N0	M0	None; diagnosed at autopsy	Surgery performed	No radiation and/or cancer-directed surgery	None/Unknown	Yes	95	300	0	0	Localized	Single (never married)	358	1317	2741	5447	573	456	3363	56	Alive	Active follow-up	Alive or dead of other cause	Alive or dead due to cancer
12	White	Female	C41.2-Vertebral column	Unknown	Positive histology	9260/3: Ewing sarcoma	T1	N0	M0	None; diagnosed at autopsy	Surgery performed	Radiation after surgery	Beam radiation	Yes	40	400	0	0	Regional	Single (never married)	358	1317	2741	5447	573	456	3363	54	Alive	Active follow-up	Alive or dead of other cause	Alive or dead due to cancer
23	White	Male	C49.2-Conn, subcutaneous, other soft tis: lower limb, hip	Unknown	Positive histology	9260/3: Ewing sarcoma	T2b	N0	M1	None; diagnosed at autopsy	Surgery performed	No radiation and/or cancer-directed surgery	None/Unknown	Yes	172	120	0	40	Distant	Single (never married)	312	959	3188	4445	797	506	3325	26	Alive	Active follow-up	Alive or dead of other cause	Alive or dead due to cancer
14	White	Male	C41.4-Pelvic bones, sacrum, coccyx and associated joints	Unknown	Positive histology	9260/3: Ewing sarcoma	T2	N0	M0	None; diagnosed at autopsy	Surgery performed	No radiation and/or cancer-directed surgery	None/Unknown	Yes	106	300	0	0	Localized	Single (never married)	157	775	2878	5833	401	440	3537	58	Alive	Active follow-up	Alive or dead of other cause	Alive or dead due to cancer
11	White	Male	C40.2-Long bones of lower limb and associated joints	Unknown	Positive histology	9260/3: Ewing sarcoma	T2	N0	M0	None; diagnosed at autopsy	Surgery performed	No radiation and/or cancer-directed surgery	None/Unknown	Yes	112	300	0	0	Localized	Single (never married)	358	1317	2741	5447	573	456	3363	47	Alive	Active follow-up	Alive or dead of other cause	Alive or dead due to cancer
7	White	Female	C41.2-Vertebral column	Unknown	Positive histology	9260/3: Ewing sarcoma	T1	N0	M0	None; diagnosed at autopsy	Surgery performed	Radiation after surgery	Beam radiation	Yes	51	100	0	0	Localized	Single (never married)	358	1317	2741	5447	573	456	3363	45	Alive	Active follow-up	Alive or dead of other cause	Alive or dead due to cancer
63	White	Female	C41.2-Vertebral column	Unknown	Positive histology	9260/3: Ewing sarcoma	TX	N0	M0	None; diagnosed at autopsy	Surgery performed	Radiation after surgery	Beam radiation	Yes	999	100	0	0	Localized	Married (including common law)	358	1317	2741	5447	573	456	3363	48	Alive	Active follow-up	Alive or dead of other cause	Alive or dead due to cancer
9	White	Female	C49.2-Conn, subcutaneous, other soft tis: lower limb, hip	Unknown	Positive histology	9260/3: Ewing sarcoma	T1b	N0	M0	Non-primary surgical procedure performed	Surgery performed	No radiation and/or cancer-directed surgery	None/Unknown	Yes	20	620	0	0	Regional	Single (never married)	157	775	2878	5833	401	440	3537	37	Alive	Active follow-up	N/A not first tumor	N/A not first tumor
19	White	Female	C41.2-Vertebral column	Unknown	Positive histology	9260/3: Ewing sarcoma	T3	N0	M1b	None; diagnosed at autopsy	Surgery performed	Radiation after surgery	Beam radiation	Yes	50	820	0	40	Distant	Single (never married)	446	1495	1994	4972	685	601	3077	35	Dead	Active follow-up	Dead (attributable to this cancer dx)	Alive or dead due to cancer
11	White	Female	C49.2-Conn, subcutaneous, other soft tis: lower limb, hip	Undifferentiated; anaplastic; Grade IV	Positive histology	9260/3: Ewing sarcoma	T2b	N1	M1	None; diagnosed at autopsy	Surgery performed	No radiation and/or cancer-directed surgery	None/Unknown	Yes	52	600	100	40	Distant	Single (never married)	358	1317	2741	5447	573	456	3363	83	Alive	Active follow-up	Alive or dead of other cause	Alive or dead due to cancer
3	White	Female	C41.9-Bone, NOS	Unknown	Positive histology	9260/3: Ewing sarcoma	TX	N0	M0	None; diagnosed at autopsy	Not recommended	No radiation and/or cancer-directed surgery	Beam radiation	Yes	999	600	0	0	Regional	Single (never married)	363	1438	1590	5044	520	557	2733	83	Alive	Active follow-up	Alive or dead of other cause	Alive or dead due to cancer
16	White	Female	C41.4-Pelvic bones, sacrum, coccyx and associated joints	Unknown	Positive histology	9260/3: Ewing sarcoma	T1	N0	M0	None; diagnosed at autopsy	Surgery performed	Radiation after surgery	Beam radiation	Yes	40	400	0	0	Regional	Single (never married)	173	1140	2376	3717	1307	528	2804	82	Alive	Active follow-up	Alive or dead of other cause	Alive or dead due to cancer
16	White	Male	C40.2-Long bones of lower limb and associated joints	Unknown	Positive histology	9260/3: Ewing sarcoma	T1	N0	M0	None; diagnosed at autopsy	Surgery performed	No radiation and/or cancer-directed surgery	None/Unknown	Yes	61	300	0	0	Localized	Single (never married)	157	775	2878	5833	401	440	3537	80	Alive	Active follow-up	Alive or dead of other cause	Alive or dead due to cancer
26	White	Male	C49.2-Conn, subcutaneous, other soft tis: lower limb, hip	Undifferentiated; anaplastic; Grade IV	Positive histology	9260/3: Ewing sarcoma	T2b	N0	M1	None; diagnosed at autopsy	Not recommended	No radiation and/or cancer-directed surgery	Beam radiation	Yes	110	420	0	40	Distant	Single (never married)	288	2020	1318	3888	1202	774	2575	8	Dead	Active follow-up	Dead (attributable to this cancer dx)	Alive or dead due to cancer
25	White	Female	C41.4-Pelvic bones, sacrum, coccyx and associated joints	Unknown	Positive histology	9260/3: Ewing sarcoma	T2	N0	M1b	None; diagnosed at autopsy	Not recommended	No radiation and/or cancer-directed surgery	Beam radiation	Yes	120	400	0	40	Distant	Single (never married)	363	1438	1590	5044	520	557	2733	15	Dead	Active follow-up	Alive or dead of other cause	Dead (attributable to causes other than this cancer dx)
28	White	Female	C41.9-Bone, NOS	Unknown	Positive histology	9260/3: Ewing sarcoma	T0	NX	M1b	Non-primary surgical procedure to distant site	Not recommended	Radiation after surgery	Beam radiation	Yes	0	950	999	50	Distant	Married (including common law)	358	1317	2741	5447	573	456	3363	2	Alive	Active follow-up	N/A not first tumor	N/A not first tumor
15	White	Male	C40.2-Long bones of lower limb and associated joints	Poorly differentiated; Grade III	Positive histology	9260/3: Ewing sarcoma	T2	N0	M0	None; diagnosed at autopsy	Surgery performed	No radiation and/or cancer-directed surgery	None/Unknown	Yes	100	400	0	0	Regional	Single (never married)	358	1317	2741	5447	573	456	3363	32	Alive	Active follow-up	Alive or dead of other cause	Alive or dead due to cancer
17	White	Male	C40.2-Long bones of lower limb and associated joints	Poorly differentiated; Grade III	Positive histology	9260/3: Ewing sarcoma	T1	N0	M0	None; diagnosed at autopsy	Surgery performed	No radiation and/or cancer-directed surgery	None/Unknown	Yes	80	400	0	0	Regional	Single (never married)	157	775	2878	5833	401	440	3537	34	Alive	Active follow-up	Alive or dead of other cause	Alive or dead due to cancer
8	White	Male	C40.1-Short bones of upper limb and associated joints	Unknown	Positive histology	9260/3: Ewing sarcoma	T1	N0	M0	None; diagnosed at autopsy	Surgery performed	Radiation after surgery	Beam radiation	Yes	26	400	0	0	Regional	Single (never married)	157	775	2878	5833	401	440	3537	25	Alive	Active follow-up	Alive or dead of other cause	Alive or dead due to cancer
33	White	Female	C64.9-Kidney, NOS	Unknown	Positive histology	9260/3: Ewing sarcoma	NA	NA	NA	None; diagnosed at autopsy	Surgery performed	Radiation after surgery	Beam radiation	Yes	100	620	0	0	Regional	Single (never married)	358	1317	2741	5447	573	456	3363	21	Dead	Active follow-up	Dead (attributable to this cancer dx)	Alive or dead due to cancer
18	White	Male	C41.3-Rib, sternum, clavicle and associated joints	Unknown	Positive histology	9260/3: Ewing sarcoma	T1	N0	M0	None; diagnosed at autopsy	Surgery performed	No radiation and/or cancer-directed surgery	None/Unknown	Yes	20	400	0	0	Regional	Single (never married)	358	1317	2741	5447	573	456	3363	24	Alive	Active follow-up	Alive or dead of other cause	Alive or dead due to cancer
23	White	Male	C41.9-Bone, NOS	Unknown	Positive exfoliative cytology, no positive histology	9260/3: Ewing sarcoma	T0	NX	M1b	None; diagnosed at autopsy	Not recommended	No radiation and/or cancer-directed surgery	None/Unknown	Yes	0	950	999	40	Distant	Single (never married)	446	1495	1994	4972	685	601	3077	6	Dead	Active follow-up	Dead (attributable to this cancer dx)	Alive or dead due to cancer
6	White	Male	C41.2-Vertebral column	Poorly differentiated; Grade III	Positive histology	9260/3: Ewing sarcoma	T1	N0	M0	None; diagnosed at autopsy	Not recommended	No radiation and/or cancer-directed surgery	Beam radiation	Yes	40	400	0	0	Regional	Single (never married)	157	775	2878	5833	401	440	3537	25	Alive	Active follow-up	Alive or dead of other cause	Alive or dead due to cancer
10	White	Male	C40.1-Short bones of upper limb and associated joints	Unknown	Positive histology	9260/3: Ewing sarcoma	T1	N0	M0	None; diagnosed at autopsy	Surgery performed	No radiation and/or cancer-directed surgery	None/Unknown	Yes	52	300	0	0	Localized	Single (never married)	358	1317	2741	5447	573	456	3363	34	Alive	Active follow-up	Alive or dead of other cause	Alive or dead due to cancer
85	White	Female	C41.3-Rib, sternum, clavicle and associated joints	Unknown	Positive histology	9260/3: Ewing sarcoma	T1	N0	M0	None; diagnosed at autopsy	Not recommended	No radiation and/or cancer-directed surgery	Beam radiation	No/Unknown	73	600	0	0	Regional	Married (including common law)	446	1495	1994	4972	685	601	3077	5	Dead	Active follow-up	Alive or dead of other cause	Dead (attributable to causes other than this cancer dx)
25	White	Female	C40.2-Long bones of lower limb and associated joints	Unknown	Positive histology	9260/3: Ewing sarcoma	TX	N0	M0	None; diagnosed at autopsy	Surgery performed	No radiation and/or cancer-directed surgery	None/Unknown	Yes	999	300	0	0	Localized	Single (never married)	358	1317	2741	5447	573	456	3363	35	Alive	Active follow-up	Alive or dead of other cause	Alive or dead due to cancer
13	White	Male	C40.0-Long bones: upper limb, scapula, and associated joints	Unknown	Positive histology	9260/3: Ewing sarcoma	TX	N1	M1b	None; diagnosed at autopsy	Not recommended	No radiation and/or cancer-directed surgery	Beam radiation	Yes	999	400	100	50	Distant	Single (never married)	358	1317	2741	5447	573	456	3363	29	Alive	Active follow-up	Alive or dead of other cause	Alive or dead due to cancer
29	White	Male	C41.4-Pelvic bones, sacrum, coccyx and associated joints	Unknown	Positive histology	9260/3: Ewing sarcoma	T1	N0	M1b	None; diagnosed at autopsy	Not recommended	No radiation and/or cancer-directed surgery	Beam radiation	Yes	64	400	0	40	Distant	Married (including common law)	358	1317	2741	5447	573	456	3363	12	Dead	Active follow-up	Dead (attributable to this cancer dx)	Alive or dead due to cancer
16	White	Male	C41.0-Bones of skull and face and associated joints	Unknown	Positive histology	9260/3: Ewing sarcoma	T1	N0	M0	None; diagnosed at autopsy	Not recommended	No radiation and/or cancer-directed surgery	Beam radiation	Yes	63	600	0	0	Regional	Single (never married)	446	1495	1994	4972	685	601	3077	19	Alive	Active follow-up	Alive or dead of other cause	Alive or dead due to cancer
40	White	Male	C49.5-Conn, subcutaneous, other soft tis: pelvis	Poorly differentiated; Grade III	Positive histology	9260/3: Ewing sarcoma	T1b	N0	M0	None; diagnosed at autopsy	Not recommended	No radiation and/or cancer-directed surgery	Beam radiation	Yes	22	120	0	0	Localized	Married (including common law)	358	1317	2741	5447	573	456	3363	16	Alive	Active follow-up	Alive or dead of other cause	Alive or dead due to cancer
11	White	Female	C41.4-Pelvic bones, sacrum, coccyx and associated joints	Unknown	Positive histology	9260/3: Ewing sarcoma	T2	N1	M1b	None; diagnosed at autopsy	Not recommended	No radiation and/or cancer-directed surgery	None/Unknown	Yes	140	600	100	40	Distant	Single (never married)	358	1317	2741	5447	573	456	3363	7	Dead	Active follow-up	Dead (attributable to this cancer dx)	Alive or dead due to cancer
31	White	Male	C41.4-Pelvic bones, sacrum, coccyx and associated joints	Unknown	Positive histology	9260/3: Ewing sarcoma	T2	N0	M0	None; diagnosed at autopsy	Not recommended	No radiation and/or cancer-directed surgery	Beam radiation	Yes	97	400	0	0	Regional	Married (including common law)	255	913	3146	5020	677	477	3731	14	Alive	Active follow-up	Alive or dead of other cause	Alive or dead due to cancer
12	White	Male	C40.0-Long bones: upper limb, scapula, and associated joints	Unknown	Positive histology	9260/3: Ewing sarcoma	T2	N0	M0	None; diagnosed at autopsy	Not recommended	No radiation and/or cancer-directed surgery	Beam radiation	Yes	100	350	0	0	Localized	Single (never married)	358	1317	2741	5447	573	456	3363	19	Alive	Active follow-up	Alive or dead of other cause	Alive or dead due to cancer
17	White	Male	C41.3-Rib, sternum, clavicle and associated joints	Unknown	Positive histology	9260/3: Ewing sarcoma	T2	N0	M1NOS	None; diagnosed at autopsy	Surgery performed	Radiation after surgery	Beam radiation	Yes	81	400	0	60	Distant	Single (never married)	358	1317	2741	5447	573	456	3363	9	Alive	Active follow-up	Alive or dead of other cause	Alive or dead due to cancer
21	White	Male	C40.2-Long bones of lower limb and associated joints	Unknown	Positive histology	9260/3: Ewing sarcoma	T1	N0	M1b	None; diagnosed at autopsy	Not recommended	No radiation and/or cancer-directed surgery	None/Unknown	Yes	65	400	0	40	Distant	Single (never married)	255	913	3146	5020	677	477	3731	4	Alive	Active follow-up	Alive or dead of other cause	Alive or dead due to cancer
18	White	Male	C40.8-Overlap of bones, joints, and art. cartilage of limbs	Unknown	Positive histology	9260/3: Ewing sarcoma	T1	N0	M0	None; diagnosed at autopsy	Surgery performed	No radiation and/or cancer-directed surgery	None/Unknown	Yes	35	400	0	0	Regional	Single (never married)	363	1438	1590	5044	520	557	2733	4	Alive	Active follow-up	Alive or dead of other cause	Alive or dead due to cancer
39	White	Female	C49.2-Conn, subcutaneous, other soft tis: lower limb, hip	Unknown	Positive histology	9260/3: Ewing sarcoma	T2b	N0	M0	None; diagnosed at autopsy	Surgery performed	No radiation and/or cancer-directed surgery	None/Unknown	Yes	52	600	0	0	Regional	Married (including common law)	157	775	2878	5833	401	440	3537	2	Alive	Active follow-up	Alive or dead of other cause	Alive or dead due to cancer
10	White	Female	C41.3-Rib, sternum, clavicle and associated joints	Unknown	Positive histology	9260/3: Ewing sarcoma	T2	N0	M0	None; diagnosed at autopsy	Surgery performed	Radiation after surgery	Beam radiation	Yes	101	400	0	0	Regional	Single (never married)	173	1140	2376	3717	1307	528	2804	11	Alive	Active follow-up	Alive or dead of other cause	Alive or dead due to cancer
20	White	Male	C40.0-Long bones: upper limb, scapula, and associated joints	Undifferentiated; anaplastic; Grade IV	Positive histology	9260/3: Ewing sarcoma	T2	N0	M0	None; diagnosed at autopsy	Surgery performed	Radiation after surgery	Beam radiation	Yes	81	400	0	0	Regional	Single (never married)	358	1317	2741	5447	573	456	3363	1	Alive	Active follow-up	Alive or dead of other cause	Alive or dead due to cancer
21	White	Male	C49.0-Conn, subcutaneous, other soft tis: head, face, neck	Unknown	Positive histology	9260/3: Ewing sarcoma	T2NOS	N0	M0	None; diagnosed at autopsy	Not recommended	No radiation and/or cancer-directed surgery	Beam radiation	Yes	76	300	0	0	Localized	Single (never married)	358	1317	2741	5447	573	456	3363	0	Alive	Active follow-up	Alive or dead of other cause	Alive or dead due to cancer
17	White	Male	C41.4-Pelvic bones, sacrum, coccyx and associated joints	Unknown	Positive histology	9260/3: Ewing sarcoma	T2	N0	M0	None; diagnosed at autopsy	Not recommended	No radiation and/or cancer-directed surgery	None/Unknown	Yes	100	400	0	0	Regional	Single (never married)	387	1121	3976	6765	441	383	4308	118	Alive	Active follow-up	Alive or dead of other cause	Alive or dead due to cancer
14	White	Female	C40.2-Long bones of lower limb and associated joints	Undifferentiated; anaplastic; Grade IV	Positive histology	9260/3: Ewing sarcoma	T1	N0	M1a	None; diagnosed at autopsy	Not recommended	No radiation and/or cancer-directed surgery	Beam radiation	Yes	60	400	0	30	Distant	Single (never married)	387	1121	3976	6765	441	383	4308	16	Dead	Active follow-up	Dead (attributable to this cancer dx)	Alive or dead due to cancer
22	White	Male	C69.6-Orbit, NOS	Unknown	Positive histology	9260/3: Ewing sarcoma	T4	NX	M1	None; diagnosed at autopsy	Not recommended	No radiation and/or cancer-directed surgery	None/Unknown	Yes	999	800	999	40	Distant	Single (never married)	565	1494	3630	5402	780	552	4035	82	Alive	Active follow-up	Alive or dead of other cause	Alive or dead due to cancer
15	White	Female	C40.2-Long bones of lower limb and associated joints	Undifferentiated; anaplastic; Grade IV	Positive histology	9260/3: Ewing sarcoma	TX	N0	M1b	None; diagnosed at autopsy	Not recommended	No radiation and/or cancer-directed surgery	Beam radiation	Yes	999	400	0	50	Distant	Single (never married)	456	1271	3406	6669	383	326	4040	116	Alive	Active follow-up	Alive or dead of other cause	Alive or dead due to cancer
62	White	Male	C40.2-Long bones of lower limb and associated joints	Unknown	Positive histology	9261/3: Adamantinoma of long bones	T1	N0	M0	None; diagnosed at autopsy	Surgery performed	No radiation and/or cancer-directed surgery	None/Unknown	No/Unknown	80	400	0	0	Regional	Married (including common law)	565	1494	3630	5402	780	552	4035	111	Alive	Active follow-up	Alive or dead of other cause	Alive or dead due to cancer
25	Black	Male	C41.0-Bones of skull and face and associated joints	Undifferentiated; anaplastic; Grade IV	Positive histology	9260/3: Ewing sarcoma	T1	N0	M0	None; diagnosed at autopsy	Surgery performed	Radiation after surgery	Beam radiation	Yes	5	600	0	0	Regional	Married (including common law)	456	1271	3406	6669	383	326	4040	93	Dead	Active follow-up	Dead (attributable to this cancer dx)	Alive or dead due to cancer
51	White	Female	C41.2-Vertebral column	Unknown	Positive histology	9260/3: Ewing sarcoma	TX	N0	M0	None; diagnosed at autopsy	Not recommended	No radiation and/or cancer-directed surgery	Beam radiation	Yes	999	300	0	0	Localized	Married (including common law)	456	1271	3406	6669	383	326	4040	27	Dead	Active follow-up	Dead (attributable to this cancer dx)	Alive or dead due to cancer
49	Black	Female	C41.0-Bones of skull and face and associated joints	Unknown	Positive histology	9260/3: Ewing sarcoma	T1	N0	M0	None; diagnosed at autopsy	Surgery performed	No radiation and/or cancer-directed surgery	None/Unknown	No/Unknown	14	300	0	0	Localized	Married (including common law)	565	1494	3630	5402	780	552	4035	17	Dead	Active follow-up	N/A not first tumor	N/A not first tumor
17	White	Female	C41.4-Pelvic bones, sacrum, coccyx and associated joints	Unknown	Positive histology	9260/3: Ewing sarcoma	TX	N0	M0	None; diagnosed at autopsy	Surgery performed	Radiation after surgery	Beam radiation	Yes	999	300	0	0	Localized	Single (never married)	565	1494	3630	5402	780	552	4035	105	Alive	Active follow-up	Alive or dead of other cause	Alive or dead due to cancer
12	White	Male	C40.2-Long bones of lower limb and associated joints	Unknown	Positive histology	9260/3: Ewing sarcoma	TX	N0	M0	None; diagnosed at autopsy	Surgery performed	No radiation and/or cancer-directed surgery	None/Unknown	Yes	999	300	0	0	Localized	Single (never married)	514	1599	4139	5814	1240	888	4413	40	Dead	Active follow-up	Dead (attributable to this cancer dx)	Alive or dead due to cancer
21	Other (American Indian/AK Native, Asian/Pacific Islander)	Female	C40.2-Long bones of lower limb and associated joints	Unknown	Positive histology	9261/3: Adamantinoma of long bones	T1	N0	M0	None; diagnosed at autopsy	Surgery performed	No radiation and/or cancer-directed surgery	None/Unknown	No/Unknown	73	100	0	0	Localized	Single (never married)	456	1271	3406	6669	383	326	4040	94	Alive	Active follow-up	Alive or dead of other cause	Alive or dead due to cancer
27	White	Female	C41.3-Rib, sternum, clavicle and associated joints	Unknown	Positive histology	9260/3: Ewing sarcoma	T2	N0	M0	None; diagnosed at autopsy	Surgery performed	No radiation and/or cancer-directed surgery	None/Unknown	Yes	100	400	0	0	Regional	Married (including common law)	387	1121	3976	6765	441	383	4308	31	Dead	Active follow-up	Dead (attributable to this cancer dx)	Alive or dead due to cancer
45	Black	Female	C40.2-Long bones of lower limb and associated joints	Undifferentiated; anaplastic; Grade IV	Positive histology	9260/3: Ewing sarcoma	T2	N0	M0	None; diagnosed at autopsy	Surgery performed	Radiation prior to surgery	Beam radiation	Yes	100	600	0	0	Regional	Single (never married)	565	1494	3630	5402	780	552	4035	78	Alive	Active follow-up	Alive or dead of other cause	Alive or dead due to cancer
26	Other (American Indian/AK Native, Asian/Pacific Islander)	Female	C17.0-Duodenum	Unknown	Positive histology	9260/3: Ewing sarcoma	NA	NA	NA	None; diagnosed at autopsy	Not recommended	No radiation and/or cancer-directed surgery	None/Unknown	Yes	20	300	0	0	Localized	Single (never married)	456	1271	3406	6669	383	326	4040	81	Alive	Active follow-up	Alive or dead of other cause	Alive or dead due to cancer
10	White	Male	C40.2-Long bones of lower limb and associated joints	Unknown	Positive histology	9260/3: Ewing sarcoma	T2	N0	M1b	None; diagnosed at autopsy	Surgery performed	Radiation after surgery	Beam radiation	Yes	149	400	0	40	Distant	Single (never married)	644	1994	1663	4678	820	551	2569	20	Dead	Active follow-up	Dead (attributable to this cancer dx)	Alive or dead due to cancer
33	Black	Female	C40.0-Long bones: upper limb, scapula, and associated joints	Unknown	Positive histology	9261/3: Adamantinoma of long bones	TX	N0	M0	None; diagnosed at autopsy	Surgery performed	No radiation and/or cancer-directed surgery	None/Unknown	No/Unknown	999	100	0	0	Localized	Married (including common law)	514	1599	4139	5814	1240	888	4413	68	Alive	Active follow-up	Alive or dead of other cause	Alive or dead due to cancer
0	White	Female	C49.0-Conn, subcutaneous, other soft tis: head, face, neck	Unknown	Positive histology	9260/3: Ewing sarcoma	T2b	N0	M0	None; diagnosed at autopsy	Surgery performed	No radiation and/or cancer-directed surgery	None/Unknown	Yes	55	320	0	0	Localized	Single (never married)	514	1599	4139	5814	1240	888	4413	81	Alive	Active follow-up	Alive or dead of other cause	Alive or dead due to cancer
21	White	Female	C64.9-Kidney, NOS	Unknown	Positive histology	9260/3: Ewing sarcoma	NA	NA	NA	None; diagnosed at autopsy	Surgery performed	No radiation and/or cancer-directed surgery	None/Unknown	Yes	90	100	0	0	Localized	Single (never married)	387	1121	3976	6765	441	383	4308	27	Alive	Active follow-up	Alive or dead of other cause	Alive or dead due to cancer
48	White	Male	C40.2-Long bones of lower limb and associated joints	Poorly differentiated; Grade III	Positive histology	9261/3: Adamantinoma of long bones	T1	N0	M0	None; diagnosed at autopsy	Surgery performed	No radiation and/or cancer-directed surgery	None/Unknown	No/Unknown	45	100	0	0	Localized	Single (never married)	456	1271	3406	6669	383	326	4040	61	Alive	Active follow-up	Alive or dead of other cause	Alive or dead due to cancer
12	Black	Male	C41.4-Pelvic bones, sacrum, coccyx and associated joints	Undifferentiated; anaplastic; Grade IV	Positive histology	9260/3: Ewing sarcoma	T1	NX	M1b	None; diagnosed at autopsy	Not recommended	No radiation and/or cancer-directed surgery	Beam radiation	Yes	80	400	999	40	Distant	Single (never married)	565	1494	3630	5402	780	552	4035	69	Alive	Active follow-up	N/A not first tumor	N/A not first tumor
12	Black	Male	C40.2-Long bones of lower limb and associated joints	Unknown	Positive histology	9260/3: Ewing sarcoma	TX	N0	M0	None; diagnosed at autopsy	Not recommended	No radiation and/or cancer-directed surgery	Beam radiation	Yes	999	300	0	0	Localized	Single (never married)	514	1599	4139	5814	1240	888	4413	58	Alive	Active follow-up	Alive or dead of other cause	Alive or dead due to cancer
2	White	Female	C40.2-Long bones of lower limb and associated joints	Unknown	Positive histology	9260/3: Ewing sarcoma	T2	N0	M1a	None; diagnosed at autopsy	Not recommended	No radiation and/or cancer-directed surgery	Beam radiation	Yes	230	300	0	30	Distant	Single (never married)	565	1494	3630	5402	780	552	4035	46	Alive	Active follow-up	Alive or dead of other cause	Alive or dead due to cancer
31	White	Male	C41.3-Rib, sternum, clavicle and associated joints	Unknown	Positive histology	9260/3: Ewing sarcoma	T2	N0	M0	None; diagnosed at autopsy	Surgery performed	Radiation after surgery	Beam radiation	Yes	100	300	0	0	Localized	Married (including common law)	387	1121	3976	6765	441	383	4308	33	Dead	Active follow-up	Alive or dead of other cause	Dead (attributable to causes other than this cancer dx)
24	White	Male	C41.4-Pelvic bones, sacrum, coccyx and associated joints	Poorly differentiated; Grade III	Positive histology	9260/3: Ewing sarcoma	T2	N0	M0	None; diagnosed at autopsy	Not recommended	No radiation and/or cancer-directed surgery	Beam radiation	Yes	130	350	0	0	Localized	Single (never married)	456	1271	3406	6669	383	326	4040	36	Dead	Active follow-up	Dead (attributable to this cancer dx)	Alive or dead due to cancer
35	White	Male	C49.2-Conn, subcutaneous, other soft tis: lower limb, hip	Unknown	Positive histology	9260/3: Ewing sarcoma	T2b	N0	M1	None; diagnosed at autopsy	Not recommended	No radiation and/or cancer-directed surgery	Beam radiation	Yes	103	620	0	40	Distant	Married (including common law)	387	1121	3976	6765	441	383	4308	36	Alive	Active follow-up	Alive or dead of other cause	Alive or dead due to cancer
14	White	Female	C40.2-Long bones of lower limb and associated joints	Undifferentiated; anaplastic; Grade IV	Positive histology	9260/3: Ewing sarcoma	T2	N0	M0	None; diagnosed at autopsy	Surgery performed	No radiation and/or cancer-directed surgery	None/Unknown	Yes	100	300	0	0	Localized	Single (never married)	514	1599	4139	5814	1240	888	4413	40	Alive	Active follow-up	Alive or dead of other cause	Alive or dead due to cancer
18	White	Male	C41.3-Rib, sternum, clavicle and associated joints	Unknown	Positive histology	9260/3: Ewing sarcoma	T2	N0	M0	None; diagnosed at autopsy	Surgery performed	No radiation and/or cancer-directed surgery	None/Unknown	Yes	85	100	0	0	Localized	Single (never married)	514	1599	4139	5814	1240	888	4413	42	Alive	Active follow-up	Alive or dead of other cause	Alive or dead due to cancer
67	White	Male	C41.3-Rib, sternum, clavicle and associated joints	Unknown	Positive histology	9260/3: Ewing sarcoma	T3	N0	M1b	Non-primary surgical procedure to distant site	Not recommended	No radiation and/or cancer-directed surgery	None/Unknown	Yes	129	820	0	40	Distant	Single (never married)	456	1271	3406	6669	383	326	4040	4	Dead	Active follow-up	Dead (attributable to this cancer dx)	Alive or dead due to cancer
19	Black	Male	C41.3-Rib, sternum, clavicle and associated joints	Unknown	Positive histology	9260/3: Ewing sarcoma	T1	N0	M0	None; diagnosed at autopsy	Not recommended	No radiation and/or cancer-directed surgery	Beam radiation	Yes	65	400	0	0	Regional	Single (never married)	456	1271	3406	6669	383	326	4040	22	Alive	Active follow-up	Alive or dead of other cause	Alive or dead due to cancer
1	Black	Female	C49.3-Conn, subcutaneous, other soft tis: thorax	Undifferentiated; anaplastic; Grade IV	Positive histology	9260/3: Ewing sarcoma	T1b	N0	M0	None; diagnosed at autopsy	Surgery performed	No radiation and/or cancer-directed surgery	None/Unknown	No/Unknown	22	120	0	0	Localized	Single (never married)	514	1599	4139	5814	1240	888	4413	12	Alive	Active follow-up	Alive or dead of other cause	Alive or dead due to cancer
39	White	Male	C41.3-Rib, sternum, clavicle and associated joints	Unknown	Positive histology	9260/3: Ewing sarcoma	T1	N0	M0	None; diagnosed at autopsy	Surgery performed	No radiation and/or cancer-directed surgery	None/Unknown	Yes	70	800	0	0	Distant	Married (including common law)	456	1271	3406	6669	383	326	4040	14	Alive	Active follow-up	Alive or dead of other cause	Alive or dead due to cancer
13	White	Female	C40.2-Long bones of lower limb and associated joints	Unknown	Positive histology	9260/3: Ewing sarcoma	T1	N0	M0	Non-primary surgical procedure to distant site	Surgery performed	No radiation and/or cancer-directed surgery	None/Unknown	Yes	30	200	0	0	Localized	Single (never married)	387	1121	3976	6765	441	383	4308	12	Alive	Active follow-up	Alive or dead of other cause	Alive or dead due to cancer
27	White	Female	C49.5-Conn, subcutaneous, other soft tis: pelvis	Undifferentiated; anaplastic; Grade IV	Positive exfoliative cytology, no positive histology	9260/3: Ewing sarcoma	T2b	N1	M1	None; diagnosed at autopsy	Not recommended	No radiation and/or cancer-directed surgery	Beam radiation	Yes	87	600	100	40	Distant	Single (never married)	514	1599	4139	5814	1240	888	4413	11	Alive	Active follow-up	Alive or dead of other cause	Alive or dead due to cancer
58	White	Male	C41.4-Pelvic bones, sacrum, coccyx and associated joints	Unknown	Positive histology	9260/3: Ewing sarcoma	TX	N0	M0	None; diagnosed at autopsy	Not recommended	No radiation and/or cancer-directed surgery	Beam radiation	Yes	999	100	0	0	Localized	Married (including common law)	387	1121	3976	6765	441	383	4308	2	Alive	Active follow-up	Alive or dead of other cause	Alive or dead due to cancer
12	Other (American Indian/AK Native, Asian/Pacific Islander)	Female	C41.4-Pelvic bones, sacrum, coccyx and associated joints	Unknown	Positive histology	9260/3: Ewing sarcoma	T2	N0	M1b	None; diagnosed at autopsy	Not recommended	No radiation and/or cancer-directed surgery	Beam radiation	Yes	90	400	0	40	Distant	Single (never married)	456	1271	3406	6669	383	326	4040	9	Alive	Active follow-up	Alive or dead of other cause	Alive or dead due to cancer
13	White	Female	C40.2-Long bones of lower limb and associated joints	Undifferentiated; anaplastic; Grade IV	Positive histology	9260/3: Ewing sarcoma	T2	N0	M0	None; diagnosed at autopsy	Recommended but not performed, patient refused	No radiation and/or cancer-directed surgery	Beam radiation	Yes	130	200	0	0	Localized	Single (never married)	387	1121	3976	6765	441	383	4308	3	Alive	Active follow-up	Alive or dead of other cause	Alive or dead due to cancer
13	White	Male	C49.3-Conn, subcutaneous, other soft tis: thorax	Unknown	Positive histology	9260/3: Ewing sarcoma	T2a	NX	M0	None; diagnosed at autopsy	Surgery performed	No radiation and/or cancer-directed surgery	None/Unknown	Yes	110	610	999	0	Regional	Single (never married)	803	1660	4048	8172	491	389	4900	117	Alive	Active follow-up	Alive or dead of other cause	Alive or dead due to cancer
17	White	Male	C41.9-Bone, NOS	Unknown	Positive histology	9260/3: Ewing sarcoma	T3	NX	M1b	None; diagnosed at autopsy	Not recommended	No radiation and/or cancer-directed surgery	Beam radiation	Yes	999	820	999	40	Distant	Single (never married)	1886	3157	2250	5117	974	872	3096	26	Dead	Active follow-up	Dead (attributable to this cancer dx)	Alive or dead due to cancer
45	White	Female	C52.9-Vagina, NOS	Unknown	Positive histology	9260/3: Ewing sarcoma	NA	NA	NA	None; diagnosed at autopsy	Not recommended	No radiation and/or cancer-directed surgery	Beam radiation	Yes	75	300	0	0	Blank(s)	Unknown	803	1660	4048	8172	491	389	4900	15	Alive	Active follow-up	N/A not first tumor	N/A not first tumor
41	White	Male	C41.4-Pelvic bones, sacrum, coccyx and associated joints	Poorly differentiated; Grade III	Positive histology	9260/3: Ewing sarcoma	T2	N0	M0	None; diagnosed at autopsy	Not recommended	No radiation and/or cancer-directed surgery	Beam radiation	Yes	150	600	0	0	Regional	Married (including common law)	803	1660	4048	8172	491	389	4900	15	Dead	Active follow-up	Dead (attributable to this cancer dx)	Alive or dead due to cancer
19	White	Male	C41.4-Pelvic bones, sacrum, coccyx and associated joints	Unknown	Positive histology	9260/3: Ewing sarcoma	T2	N0	M0	None; diagnosed at autopsy	Not recommended	No radiation and/or cancer-directed surgery	None/Unknown	Yes	110	400	0	0	Regional	Separated	1886	3157	2250	5117	974	872	3096	102	Alive	Active follow-up	Alive or dead of other cause	Alive or dead due to cancer
15	White	Female	C41.4-Pelvic bones, sacrum, coccyx and associated joints	Unknown	Positive histology	9260/3: Ewing sarcoma	T1	N1	M0	None; diagnosed at autopsy	Not recommended	No radiation and/or cancer-directed surgery	Beam radiation	Yes	63	400	100	0	Regional	Single (never married)	971	1678	3418	6194	670	606	4131	43	Dead	Active follow-up	Dead (attributable to this cancer dx)	Alive or dead due to cancer
19	Black	Male	C40.2-Long bones of lower limb and associated joints	Unknown	Positive histology	9260/3: Ewing sarcoma	T2	N0	M0	None; diagnosed at autopsy	Surgery performed	No radiation and/or cancer-directed surgery	None/Unknown	Yes	141	100	0	0	Localized	Single (never married)	803	1660	4048	8172	491	389	4900	16	Dead	Active follow-up	Dead (attributable to this cancer dx)	Alive or dead due to cancer
19	White	Male	C40.2-Long bones of lower limb and associated joints	Unknown	Positive histology	9260/3: Ewing sarcoma	T2	N0	M0	None; diagnosed at autopsy	Surgery performed	No radiation and/or cancer-directed surgery	None/Unknown	Yes	107	300	0	0	Localized	Single (never married)	803	1660	4048	8172	491	389	4900	37	Alive	Active follow-up	Alive or dead of other cause	Alive or dead due to cancer
23	White	Male	C41.2-Vertebral column	Unknown	Positive histology	9260/3: Ewing sarcoma	T2	NX	M1b	None; diagnosed at autopsy	Surgery performed	Radiation after surgery	Beam radiation	Yes	140	800	999	40	Distant	Single (never married)	971	1678	3418	6194	670	606	4131	7	Dead	Active follow-up	Dead (attributable to this cancer dx)	Alive or dead due to cancer
16	White	Male	C40.3-Short bones of lower limb and associated joints	Unknown	Positive histology	9260/3: Ewing sarcoma	TX	NX	M1a	None; diagnosed at autopsy	Surgery performed	Radiation after surgery	Beam radiation	Yes	999	100	999	30	Distant	Single (never married)	803	1660	4048	8172	491	389	4900	19	Dead	Active follow-up	Dead (attributable to this cancer dx)	Alive or dead due to cancer
44	White	Female	C49.2-Conn, subcutaneous, other soft tis: lower limb, hip	Unknown	Positive histology	9260/3: Ewing sarcoma	TX	N0	M0	None; diagnosed at autopsy	Surgery performed	No radiation and/or cancer-directed surgery	None/Unknown	No/Unknown	999	300	0	0	Localized	Married (including common law)	803	1660	4048	8172	491	389	4900	28	Alive	Active follow-up	N/A not first tumor	N/A not first tumor
17	White	Female	C40.2-Long bones of lower limb and associated joints	Unknown	Positive histology	9260/3: Ewing sarcoma	T2	N0	M0	None; diagnosed at autopsy	Not recommended	No radiation and/or cancer-directed surgery	Beam radiation	Yes	100	400	0	0	Regional	Single (never married)	803	1660	4048	8172	491	389	4900	94	Alive	Active follow-up	Alive or dead of other cause	Alive or dead due to cancer
13	White	Male	C40.0-Long bones: upper limb, scapula, and associated joints	Unknown	Positive histology	9260/3: Ewing sarcoma	T2	N0	M0	None; diagnosed at autopsy	Surgery performed	No radiation and/or cancer-directed surgery	None/Unknown	Yes	150	300	0	0	Localized	Single (never married)	803	1660	4048	8172	491	389	4900	88	Alive	Active follow-up	Alive or dead of other cause	Alive or dead due to cancer
22	White	Male	C40.3-Short bones of lower limb and associated joints	Unknown	Positive histology	9260/3: Ewing sarcoma	T1	N0	M1a	None; diagnosed at autopsy	Surgery performed	Radiation after surgery	Beam radiation	Yes	68	400	0	30	Distant	Single (never married)	1886	3157	2250	5117	974	872	3096	78	Alive	Active follow-up	Alive or dead of other cause	Alive or dead due to cancer
8	White	Female	C41.3-Rib, sternum, clavicle and associated joints	Unknown	Positive histology	9260/3: Ewing sarcoma	T2	N0	M0	None; diagnosed at autopsy	Surgery performed	No radiation and/or cancer-directed surgery	None/Unknown	Yes	98	100	0	0	Localized	Single (never married)	803	1660	4048	8172	491	389	4900	81	Alive	Active follow-up	Alive or dead of other cause	Alive or dead due to cancer
4	White	Male	C40.2-Long bones of lower limb and associated joints	Unknown	Positive histology	9260/3: Ewing sarcoma	T1	N0	M0	None; diagnosed at autopsy	Not recommended	No radiation and/or cancer-directed surgery	None/Unknown	Yes	60	100	0	0	Localized	Single (never married)	803	1660	4048	8172	491	389	4900	80	Alive	Active follow-up	Alive or dead of other cause	Alive or dead due to cancer
24	White	Male	C41.4-Pelvic bones, sacrum, coccyx and associated joints	Unknown	Positive histology	9260/3: Ewing sarcoma	T2	NX	M1b	None; diagnosed at autopsy	Not recommended	No radiation and/or cancer-directed surgery	Beam radiation	Yes	164	800	999	40	Distant	Married (including common law)	803	1660	4048	8172	491	389	4900	28	Dead	Active follow-up	Dead (attributable to this cancer dx)	Alive or dead due to cancer
18	White	Male	C41.3-Rib, sternum, clavicle and associated joints	Unknown	Positive histology	9260/3: Ewing sarcoma	T2	NX	M0	None; diagnosed at autopsy	Surgery performed	No radiation and/or cancer-directed surgery	None/Unknown	Yes	200	100	999	0	Localized	Single (never married)	1886	3157	2250	5117	974	872	3096	75	Alive	Active follow-up	Alive or dead of other cause	Alive or dead due to cancer
3	White	Male	C40.0-Long bones: upper limb, scapula, and associated joints	Unknown	Positive histology	9260/3: Ewing sarcoma	TX	N0	M0	None; diagnosed at autopsy	Surgery performed	No radiation and/or cancer-directed surgery	None/Unknown	Yes	999	100	0	0	Localized	Single (never married)	803	1660	4048	8172	491	389	4900	77	Alive	Active follow-up	Alive or dead of other cause	Alive or dead due to cancer
21	White	Female	C41.3-Rib, sternum, clavicle and associated joints	Unknown	Positive histology	9260/3: Ewing sarcoma	T2	N0	M0	None; diagnosed at autopsy	Surgery performed	Radiation after surgery	Beam radiation	Yes	138	600	0	0	Regional	Married (including common law)	803	1660	4048	8172	491	389	4900	75	Alive	Active follow-up	Alive or dead of other cause	Alive or dead due to cancer
12	Black	Male	C41.3-Rib, sternum, clavicle and associated joints	Unknown	Positive histology	9260/3: Ewing sarcoma	T1	N0	M0	None; diagnosed at autopsy	Surgery performed	No radiation and/or cancer-directed surgery	None/Unknown	Yes	58	100	0	0	Localized	Single (never married)	803	1660	4048	8172	491	389	4900	69	Alive	Active follow-up	Alive or dead of other cause	Alive or dead due to cancer
13	White	Male	C41.4-Pelvic bones, sacrum, coccyx and associated joints	Unknown	Positive histology	9260/3: Ewing sarcoma	TX	N1	M1a	Non-primary surgical procedure to distant site	Not recommended	Radiation after surgery	Beam radiation	Yes	999	400	100	30	Distant	Single (never married)	803	1660	4048	8172	491	389	4900	39	Dead	Active follow-up	Dead (attributable to this cancer dx)	Alive or dead due to cancer
1	White	Male	C41.2-Vertebral column	Unknown	Positive histology	9260/3: Ewing sarcoma	TX	N0	M0	None; diagnosed at autopsy	Not recommended	No radiation and/or cancer-directed surgery	Beam radiation	Yes	999	100	0	0	Localized	Single (never married)	971	1678	3418	6194	670	606	4131	66	Alive	Active follow-up	Alive or dead of other cause	Alive or dead due to cancer
9	White	Male	C41.3-Rib, sternum, clavicle and associated joints	Poorly differentiated; Grade III	Positive histology	9260/3: Ewing sarcoma	T1	N0	M0	None; diagnosed at autopsy	Surgery performed	Radiation after surgery	Beam radiation	Yes	60	400	0	0	Regional	Single (never married)	803	1660	4048	8172	491	389	4900	26	Dead	Active follow-up	Dead (attributable to this cancer dx)	Alive or dead due to cancer
9	Other (American Indian/AK Native, Asian/Pacific Islander)	Female	C40.0-Long bones: upper limb, scapula, and associated joints	Unknown	Positive histology	9260/3: Ewing sarcoma	TX	N0	M0	None; diagnosed at autopsy	Surgery performed	No radiation and/or cancer-directed surgery	None/Unknown	Yes	999	100	0	0	Localized	Single (never married)	803	1660	4048	8172	491	389	4900	53	Alive	Active follow-up	Alive or dead of other cause	Alive or dead due to cancer
21	White	Male	C41.3-Rib, sternum, clavicle and associated joints	Unknown	Positive histology	9260/3: Ewing sarcoma	T2	N0	M1b	Non-primary surgical procedure to distant site	Surgery performed	Radiation after surgery	Beam radiation	Yes	105	600	0	40	Distant	Single (never married)	803	1660	4048	8172	491	389	4900	58	Alive	Active follow-up	Alive or dead of other cause	Alive or dead due to cancer
15	White	Male	C40.2-Long bones of lower limb and associated joints	Unknown	Positive histology	9260/3: Ewing sarcoma	T2	N1	M1b	None; diagnosed at autopsy	Not recommended	No radiation and/or cancer-directed surgery	Beam radiation	Yes	97	400	100	50	Distant	Single (never married)	803	1660	4048	8172	491	389	4900	42	Dead	Active follow-up	Dead (attributable to this cancer dx)	Alive or dead due to cancer
72	White	Female	C40.0-Long bones: upper limb, scapula, and associated joints	Undifferentiated; anaplastic; Grade IV	Positive histology	9260/3: Ewing sarcoma	T1	N0	M1NOS	None; diagnosed at autopsy	Not recommended	No radiation and/or cancer-directed surgery	Recommended, unknown if administered	Yes	72	400	0	60	Distant	Widowed	1886	3157	2250	5117	974	872	3096	11	Dead	Active follow-up	Dead (attributable to this cancer dx)	Alive or dead due to cancer
15	White	Female	C07.9-Parotid gland	Unknown	Positive histology	9260/3: Ewing sarcoma	NA	NA	NA	None; diagnosed at autopsy	Not recommended	Radiation after surgery	Beam radiation	Yes	50	100	100	0	Regional	Single (never married)	803	1660	4048	8172	491	389	4900	48	Alive	Active follow-up	Alive or dead of other cause	Alive or dead due to cancer
35	Black	Male	C40.0-Long bones: upper limb, scapula, and associated joints	Unknown	Positive histology	9260/3: Ewing sarcoma	TX	NX	M1a	None; diagnosed at autopsy	Not recommended	No radiation and/or cancer-directed surgery	None/Unknown	No/Unknown	999	999	999	30	Distant	Single (never married)	803	1660	4048	8172	491	389	4900	17	Dead	Active follow-up	Alive or dead of other cause	Dead (attributable to causes other than this cancer dx)
20	White	Female	C41.4-Pelvic bones, sacrum, coccyx and associated joints	Unknown	Positive histology	9260/3: Ewing sarcoma	T1	N0	M1b	None; diagnosed at autopsy	Not recommended	No radiation and/or cancer-directed surgery	Beam radiation	Yes	75	400	0	40	Distant	Single (never married)	1886	3157	2250	5117	974	872	3096	37	Alive	Active follow-up	Alive or dead of other cause	Alive or dead due to cancer
2	White	Male	C40.2-Long bones of lower limb and associated joints	Unknown	Positive histology	9260/3: Ewing sarcoma	T1	N0	M0	None; diagnosed at autopsy	Surgery performed	No radiation and/or cancer-directed surgery	None/Unknown	Yes	50	100	0	0	Localized	Single (never married)	1886	3157	2250	5117	974	872	3096	38	Alive	Active follow-up	Alive or dead of other cause	Alive or dead due to cancer
29	White	Female	C41.2-Vertebral column	Unknown	Positive histology	9260/3: Ewing sarcoma	TX	NX	MX	None; diagnosed at autopsy	Surgery performed	Radiation after surgery	Beam radiation	Yes	999	999	999	99	Unstaged	Single (never married)	803	1660	4048	8172	491	389	4900	15	Dead	Active follow-up	Dead (attributable to this cancer dx)	Alive or dead due to cancer
51	White	Female	C41.4-Pelvic bones, sacrum, coccyx and associated joints	Unknown	Positive histology	9260/3: Ewing sarcoma	TX	N0	MX	None; diagnosed at autopsy	Surgery performed	Radiation after surgery	Beam radiation	Yes	999	999	0	99	Unstaged	Married (including common law)	1886	3157	2250	5117	974	872	3096	19	Dead	Active follow-up	Dead (attributable to this cancer dx)	Alive or dead due to cancer
12	Other (American Indian/AK Native, Asian/Pacific Islander)	Male	C41.1-Mandible	Unknown	Positive histology	9260/3: Ewing sarcoma	T1	N0	M0	None; diagnosed at autopsy	Not recommended	No radiation and/or cancer-directed surgery	Beam radiation	Yes	48	100	0	0	Localized	Single (never married)	1886	3157	2250	5117	974	872	3096	19	Alive	Active follow-up	Alive or dead of other cause	Alive or dead due to cancer
12	White	Male	C40.2-Long bones of lower limb and associated joints	Unknown	Positive histology	9260/3: Ewing sarcoma	T2	N0	M1a	None; diagnosed at autopsy	Not recommended	No radiation and/or cancer-directed surgery	Beam radiation	Yes	148	300	0	30	Distant	Single (never married)	803	1660	4048	8172	491	389	4900	12	Alive	Active follow-up	Alive or dead of other cause	Alive or dead due to cancer
24	White	Male	C41.4-Pelvic bones, sacrum, coccyx and associated joints	Unknown	Positive histology	9260/3: Ewing sarcoma	T2	N1	M1b	None; diagnosed at autopsy	Not recommended	No radiation and/or cancer-directed surgery	Beam radiation	Yes	154	600	100	40	Distant	Single (never married)	971	1678	3418	6194	670	606	4131	12	Alive	Active follow-up	Alive or dead of other cause	Alive or dead due to cancer
43	White	Female	C64.9-Kidney, NOS	Unknown	Positive histology	9260/3: Ewing sarcoma	NA	NA	NA	None; diagnosed at autopsy	Surgery performed	No radiation and/or cancer-directed surgery	None/Unknown	No/Unknown	50	601	0	0	Regional	Single (never married)	971	1678	3418	6194	670	606	4131	8	Alive	Active follow-up	Alive or dead of other cause	Alive or dead due to cancer
12	White	Male	C40.0-Long bones: upper limb, scapula, and associated joints	Unknown	Positive histology	9260/3: Ewing sarcoma	T2	N0	M1a	None; diagnosed at autopsy	Surgery performed	Radiation after surgery	Beam radiation	Yes	90	300	0	30	Distant	Single (never married)	803	1660	4048	8172	491	389	4900	2	Alive	Active follow-up	Alive or dead of other cause	Alive or dead due to cancer
13	White	Male	C40.2-Long bones of lower limb and associated joints	Unknown	Positive histology	9260/3: Ewing sarcoma	TX	N0	M0	None; diagnosed at autopsy	Not recommended	No radiation and/or cancer-directed surgery	None/Unknown	Yes	999	400	0	0	Regional	Single (never married)	1625	3010	2486	4645	1445	823	3498	87	Alive	Active follow-up	N/A not first tumor	N/A not first tumor
77	White	Male	C49.2-Conn, subcutaneous, other soft tis: lower limb, hip	Unknown	Positive histology	9260/3: Ewing sarcoma	T2a	N0	M0	None; diagnosed at autopsy	Surgery performed	No radiation and/or cancer-directed surgery	None/Unknown	No/Unknown	70	110	0	0	Localized	Married (including common law)	1625	3010	2486	4645	1445	823	3498	33	Dead	Active follow-up	N/A not first tumor	N/A not first tumor
63	White	Female	C41.9-Bone, NOS	Unknown	Positive histology	9260/3: Ewing sarcoma	T0	N1	M0	None; diagnosed at autopsy	Not recommended	No radiation and/or cancer-directed surgery	None/Unknown	Yes	0	950	100	0	Regional	Married (including common law)	1625	3010	2486	4645	1445	823	3498	37	Alive	Active follow-up	N/A not first tumor	N/A not first tumor
76	White	Male	C41.0-Bones of skull and face and associated joints	Unknown	Positive histology	9260/3: Ewing sarcoma	TX	N0	M0	None; diagnosed at autopsy	Surgery performed	No radiation and/or cancer-directed surgery	None/Unknown	Yes	999	300	0	0	Localized	Married (including common law)	1625	3010	2486	4645	1445	823	3498	14	Alive	Active follow-up	N/A not first tumor	N/A not first tumor
16	White	Female	C72.1-Cauda equina	Unknown	Positive histology	9260/3: Ewing sarcoma	NA	NA	NA	None; diagnosed at autopsy	Surgery performed	Radiation after surgery	Beam radiation	Yes	999	100	988	99	Unstaged	Single (never married)	1625	3010	2486	4645	1445	823	3498	37	Dead	Active follow-up	Dead (attributable to this cancer dx)	Alive or dead due to cancer
22	White	Female	C40.0-Long bones: upper limb, scapula, and associated joints	Unknown	Positive histology	9260/3: Ewing sarcoma	T1	N0	M0	None; diagnosed at autopsy	Surgery performed	Radiation prior to surgery	Beam radiation	Yes	60	400	0	0	Regional	Single (never married)	1625	3010	2486	4645	1445	823	3498	118	Alive	Active follow-up	Alive or dead of other cause	Alive or dead due to cancer
27	White	Female	C49.1-Conn, subcutaneous, other soft tis: upr limb, shoulder	Poorly differentiated; Grade III	Positive histology	9260/3: Ewing sarcoma	T1NOS	N0	M0	None; diagnosed at autopsy	Surgery performed	No radiation and/or cancer-directed surgery	None/Unknown	Yes	45	400	0	0	Regional	Single (never married)	1625	3010	2486	4645	1445	823	3498	119	Alive	Active follow-up	Alive or dead of other cause	Alive or dead due to cancer
17	White	Male	C41.2-Vertebral column	Undifferentiated; anaplastic; Grade IV	Positive histology	9260/3: Ewing sarcoma	T1	N0	M1a	None; diagnosed at autopsy	Surgery performed	No radiation and/or cancer-directed surgery	None/Unknown	Yes	80	400	0	30	Distant	Single (never married)	1625	3010	2486	4645	1445	823	3498	3	Dead	Active follow-up	Dead (attributable to this cancer dx)	Alive or dead due to cancer
68	Other (American Indian/AK Native, Asian/Pacific Islander)	Female	C47.2-Periph nerves & autonomic nerv sys: lower limb, hip	Moderately differentiated; Grade II	Positive histology	9260/3: Ewing sarcoma	T2b	N0	M0	None; diagnosed at autopsy	Surgery performed	Radiation after surgery	Beam radiation	No/Unknown	320	620	0	0	Regional	Married (including common law)	1625	3010	2486	4645	1445	823	3498	27	Dead	Active follow-up	Dead (attributable to this cancer dx)	Alive or dead due to cancer
25	Black	Male	C49.0-Conn, subcutaneous, other soft tis: head, face, neck	Poorly differentiated; Grade III	Positive histology	9260/3: Ewing sarcoma	T1a	N0	M0	None; diagnosed at autopsy	Surgery performed	Radiation after surgery	Beam radiation	Yes	20	310	0	0	Localized	Married (including common law)	1625	3010	2486	4645	1445	823	3498	100	Alive	Active follow-up	Alive or dead of other cause	Alive or dead due to cancer
28	White	Male	C40.2-Long bones of lower limb and associated joints	Undifferentiated; anaplastic; Grade IV	Positive histology	9260/3: Ewing sarcoma	T1	N0	M0	None; diagnosed at autopsy	Surgery performed	Radiation prior to surgery	Beam radiation	Yes	75	200	0	0	Localized	Single (never married)	1625	3010	2486	4645	1445	823	3498	116	Alive	Active follow-up	Alive or dead of other cause	Alive or dead due to cancer
35	White	Female	C49.1-Conn, subcutaneous, other soft tis: upr limb, shoulder	Unknown	Positive histology	9260/3: Ewing sarcoma	T1a	N0	M0	None; diagnosed at autopsy	Surgery performed	No radiation and/or cancer-directed surgery	None/Unknown	No/Unknown	25	110	0	0	Localized	Single (never married)	1625	3010	2486	4645	1445	823	3498	116	Alive	Active follow-up	Alive or dead of other cause	Alive or dead due to cancer
10	White	Male	C41.0-Bones of skull and face and associated joints	Unknown	Positive exfoliative cytology, no positive histology	9260/3: Ewing sarcoma	TX	N0	M0	None; diagnosed at autopsy	Not recommended	No radiation and/or cancer-directed surgery	Beam radiation	Yes	999	600	0	0	Regional	Single (never married)	1625	3010	2486	4645	1445	823	3498	110	Alive	Active follow-up	Alive or dead of other cause	Alive or dead due to cancer
46	White	Female	C80.9-Unknown primary site	Unknown	Positive histology	9260/3: Ewing sarcoma	NA	NA	NA	None; diagnosed at autopsy	Not recommended	No radiation and/or cancer-directed surgery	None/Unknown	No/Unknown	999	988	988	98	Unstaged	Married (including common law)	1625	3010	2486	4645	1445	823	3498	12	Dead	Active follow-up	Dead (attributable to this cancer dx)	Alive or dead due to cancer
49	White	Female	C41.4-Pelvic bones, sacrum, coccyx and associated joints	Undifferentiated; anaplastic; Grade IV	Positive histology	9260/3: Ewing sarcoma	TX	NX	M1a	None; diagnosed at autopsy	Not recommended	No radiation and/or cancer-directed surgery	None/Unknown	Yes	999	400	999	30	Distant	Single (never married)	1625	3010	2486	4645	1445	823	3498	6	Dead	Active follow-up	Dead (attributable to this cancer dx)	Alive or dead due to cancer
60	White	Female	C49.3-Conn, subcutaneous, other soft tis: thorax	Undifferentiated; anaplastic; Grade IV	Positive histology	9260/3: Ewing sarcoma	T2NOS	NX	MX	None; diagnosed at autopsy	Not recommended	No radiation and/or cancer-directed surgery	None/Unknown	No/Unknown	138	300	999	99	Localized	Single (never married)	1625	3010	2486	4645	1445	823	3498	6	Dead	Active follow-up	Dead (attributable to this cancer dx)	Alive or dead due to cancer
7	White	Male	C40.2-Long bones of lower limb and associated joints	Unknown	Positive histology	9260/3: Ewing sarcoma	TX	NX	M0	None; diagnosed at autopsy	Surgery performed	No radiation and/or cancer-directed surgery	None/Unknown	Yes	999	300	999	0	Localized	Single (never married)	1625	3010	2486	4645	1445	823	3498	110	Alive	Active follow-up	Alive or dead of other cause	Alive or dead due to cancer
19	White	Female	C40.2-Long bones of lower limb and associated joints	Undifferentiated; anaplastic; Grade IV	Positive histology	9260/3: Ewing sarcoma	T1	N0	M0	None; diagnosed at autopsy	Surgery performed	Radiation prior to surgery	Beam radiation	Yes	65	600	0	0	Regional	Single (never married)	1625	3010	2486	4645	1445	823	3498	110	Alive	Active follow-up	Alive or dead of other cause	Alive or dead due to cancer
16	White	Female	C41.3-Rib, sternum, clavicle and associated joints	Unknown	Positive histology	9260/3: Ewing sarcoma	T2	N0	M0	None; diagnosed at autopsy	Surgery performed	Radiation after surgery	Beam radiation	Yes	180	600	0	0	Regional	Single (never married)	1625	3010	2486	4645	1445	823	3498	110	Alive	Active follow-up	Alive or dead of other cause	Alive or dead due to cancer
2	Other (American Indian/AK Native, Asian/Pacific Islander)	Female	C49.6-Conn, subcutaneous, other soft tis: trunk, NOS	Unknown	Positive histology	9260/3: Ewing sarcoma	T1NOS	N0	M0	None; diagnosed at autopsy	Not recommended	No radiation and/or cancer-directed surgery	None/Unknown	Yes	33	100	0	0	Localized	Single (never married)	1625	3010	2486	4645	1445	823	3498	29	Dead	Active follow-up	Dead (attributable to this cancer dx)	Alive or dead due to cancer
11	White	Male	C49.2-Conn, subcutaneous, other soft tis: lower limb, hip	Unknown	Positive histology	9260/3: Ewing sarcoma	TX	N0	M0	None; diagnosed at autopsy	Surgery performed	No radiation and/or cancer-directed surgery	None/Unknown	Yes	999	420	0	0	Regional	Single (never married)	1625	3010	2486	4645	1445	823	3498	86	Alive	Active follow-up	Alive or dead of other cause	Alive or dead due to cancer
12	White	Male	C40.0-Long bones: upper limb, scapula, and associated joints	Unknown	Positive histology	9260/3: Ewing sarcoma	T2	N1	M0	None; diagnosed at autopsy	Surgery performed	No radiation and/or cancer-directed surgery	None/Unknown	Yes	150	400	100	0	Regional	Single (never married)	1625	3010	2486	4645	1445	823	3498	13	Dead	Active follow-up	Dead (attributable to this cancer dx)	Alive or dead due to cancer
18	White	Male	C41.4-Pelvic bones, sacrum, coccyx and associated joints	Unknown	Positive histology	9260/3: Ewing sarcoma	T2	N0	M0	None; diagnosed at autopsy	Not recommended	No radiation and/or cancer-directed surgery	Beam radiation	Yes	100	400	0	0	Regional	Single (never married)	1625	3010	2486	4645	1445	823	3498	54	Dead	Active follow-up	Dead (attributable to this cancer dx)	Alive or dead due to cancer
47	White	Female	C41.4-Pelvic bones, sacrum, coccyx and associated joints	Unknown	Positive histology	9260/3: Ewing sarcoma	T1	N0	M1b	None; diagnosed at autopsy	Surgery performed	Radiation prior to surgery	Beam radiation	Yes	76	400	0	40	Distant	Married (including common law)	1625	3010	2486	4645	1445	823	3498	15	Dead	Active follow-up	Dead (attributable to this cancer dx)	Alive or dead due to cancer
23	White	Female	C40.0-Long bones: upper limb, scapula, and associated joints	Unknown	Positive histology	9260/3: Ewing sarcoma	TX	N0	M0	None; diagnosed at autopsy	Surgery performed	No radiation and/or cancer-directed surgery	None/Unknown	No/Unknown	999	400	0	0	Regional	Single (never married)	1625	3010	2486	4645	1445	823	3498	104	Alive	Active follow-up	Alive or dead of other cause	Alive or dead due to cancer
58	White	Female	C49.0-Conn, subcutaneous, other soft tis: head, face, neck	Unknown	Positive histology	9260/3: Ewing sarcoma	TX	N0	M0	None; diagnosed at autopsy	Not recommended	No radiation and/or cancer-directed surgery	None/Unknown	No/Unknown	999	100	0	0	Localized	Married (including common law)	1625	3010	2486	4645	1445	823	3498	53	Alive	Active follow-up	N/A not first tumor	N/A not first tumor
12	White	Male	C49.2-Conn, subcutaneous, other soft tis: lower limb, hip	Unknown	Positive histology	9260/3: Ewing sarcoma	T1a	N0	M0	None; diagnosed at autopsy	Surgery performed	Radiation after surgery	Beam radiation	Yes	30	110	0	0	Localized	Single (never married)	1625	3010	2486	4645	1445	823	3498	103	Alive	Active follow-up	Alive or dead of other cause	Alive or dead due to cancer
28	White	Female	C40.2-Long bones of lower limb and associated joints	Unknown	Positive histology	9260/3: Ewing sarcoma	T2	N0	M1b	None; diagnosed at autopsy	Surgery performed	Radiation after surgery	Beam radiation	No/Unknown	195	400	0	40	Distant	Single (never married)	1625	3010	2486	4645	1445	823	3498	0	Dead	Active follow-up	Dead (attributable to this cancer dx)	Alive or dead due to cancer
5	White	Male	C41.0-Bones of skull and face and associated joints	Undifferentiated; anaplastic; Grade IV	Positive histology	9260/3: Ewing sarcoma	T1	N1	M0	None; diagnosed at autopsy	Surgery performed	Radiation after surgery	Beam radiation	Yes	15	400	100	0	Regional	Single (never married)	1625	3010	2486	4645	1445	823	3498	93	Alive	Active follow-up	Alive or dead of other cause	Alive or dead due to cancer
12	White	Male	C40.2-Long bones of lower limb and associated joints	Undifferentiated; anaplastic; Grade IV	Positive histology	9260/3: Ewing sarcoma	T2	N0	M0	None; diagnosed at autopsy	Surgery performed	No radiation and/or cancer-directed surgery	None/Unknown	Yes	194	400	0	0	Regional	Single (never married)	1625	3010	2486	4645	1445	823	3498	77	Dead	Active follow-up	Dead (attributable to this cancer dx)	Alive or dead due to cancer
18	Other (American Indian/AK Native, Asian/Pacific Islander)	Female	C49.3-Conn, subcutaneous, other soft tis: thorax	Unknown	Positive histology	9260/3: Ewing sarcoma	TX	NX	M1	None; diagnosed at autopsy	Not recommended	No radiation and/or cancer-directed surgery	None/Unknown	Yes	260	999	999	40	Distant	Single (never married)	1625	3010	2486	4645	1445	823	3498	11	Dead	Active follow-up	Dead (attributable to this cancer dx)	Alive or dead due to cancer
2	White	Male	C40.2-Long bones of lower limb and associated joints	Undifferentiated; anaplastic; Grade IV	Positive histology	9260/3: Ewing sarcoma	T2	N0	M0	None; diagnosed at autopsy	Surgery performed	No radiation and/or cancer-directed surgery	None/Unknown	Yes	107	200	0	0	Localized	Single (never married)	1625	3010	2486	4645	1445	823	3498	101	Alive	Active follow-up	Alive or dead of other cause	Alive or dead due to cancer
12	White	Female	C41.4-Pelvic bones, sacrum, coccyx and associated joints	Unknown	Positive histology	9260/3: Ewing sarcoma	TX	N0	M0	None; diagnosed at autopsy	Surgery performed	No radiation and/or cancer-directed surgery	None/Unknown	Yes	999	400	0	0	Regional	Single (never married)	1625	3010	2486	4645	1445	823	3498	101	Alive	Active follow-up	Alive or dead of other cause	Alive or dead due to cancer
16	White	Male	C41.2-Vertebral column	Unknown	Positive histology	9260/3: Ewing sarcoma	TX	NX	MX	None; diagnosed at autopsy	Not recommended	No radiation and/or cancer-directed surgery	None/Unknown	Yes	999	999	999	99	Unstaged	Single (never married)	1625	3010	2486	4645	1445	823	3498	15	Dead	Active follow-up	Dead (attributable to this cancer dx)	Alive or dead due to cancer
4	White	Male	C40.0-Long bones: upper limb, scapula, and associated joints	Unknown	Positive histology	9260/3: Ewing sarcoma	TX	N0	M0	None; diagnosed at autopsy	Surgery performed	No radiation and/or cancer-directed surgery	None/Unknown	Yes	999	100	0	0	Localized	Single (never married)	1625	3010	2486	4645	1445	823	3498	98	Alive	Active follow-up	Alive or dead of other cause	Alive or dead due to cancer
4	White	Male	C40.2-Long bones of lower limb and associated joints	Poorly differentiated; Grade III	Positive histology	9260/3: Ewing sarcoma	T1	N0	M0	None; diagnosed at autopsy	Surgery performed	No radiation and/or cancer-directed surgery	None/Unknown	Yes	61	100	0	0	Localized	Single (never married)	1625	3010	2486	4645	1445	823	3498	67	Alive	Active follow-up	Alive or dead of other cause	Alive or dead due to cancer
43	Other (American Indian/AK Native, Asian/Pacific Islander)	Female	C49.9-Conn, subcutaneous and other soft tissues, NOS	Unknown	Positive exfoliative cytology, no positive histology	9260/3: Ewing sarcoma	TX	NX	MX	None; diagnosed at autopsy	Not performed, patient died prior to recommended surgery	No radiation and/or cancer-directed surgery	None/Unknown	No/Unknown	45	999	999	99	Unstaged	Single (never married)	1625	3010	2486	4645	1445	823	3498	0	Dead	Active follow-up	N/A not first tumor	N/A not first tumor
7	White	Male	C41.4-Pelvic bones, sacrum, coccyx and associated joints	Undifferentiated; anaplastic; Grade IV	Positive histology	9260/3: Ewing sarcoma	T2	N1	M0	None; diagnosed at autopsy	Surgery performed	Radiation after surgery	Beam radiation	Yes	130	400	100	0	Regional	Single (never married)	1625	3010	2486	4645	1445	823	3498	20	Dead	Active follow-up	Dead (attributable to this cancer dx)	Alive or dead due to cancer
4	Other (American Indian/AK Native, Asian/Pacific Islander)	Male	C41.4-Pelvic bones, sacrum, coccyx and associated joints	Unknown	Positive histology	9260/3: Ewing sarcoma	T1	N0	M0	None; diagnosed at autopsy	Not recommended	No radiation and/or cancer-directed surgery	None/Unknown	Yes	71	600	0	0	Regional	Single (never married)	1625	3010	2486	4645	1445	823	3498	86	Alive	Active follow-up	Alive or dead of other cause	Alive or dead due to cancer
26	White	Female	C49.5-Conn, subcutaneous, other soft tis: pelvis	Unknown	Positive histology	9260/3: Ewing sarcoma	T2NOS	NX	M1	None; diagnosed at autopsy	Not recommended	No radiation and/or cancer-directed surgery	None/Unknown	No/Unknown	200	400	999	40	Distant	Single (never married)	1625	3010	2486	4645	1445	823	3498	1	Dead	Active follow-up	Dead (attributable to this cancer dx)	Alive or dead due to cancer
14	Black	Male	C41.2-Vertebral column	Unknown	Positive histology	9260/3: Ewing sarcoma	TX	N0	M1b	None; diagnosed at autopsy	Surgery performed	Radiation after surgery	Beam radiation	Yes	999	400	0	40	Distant	Single (never married)	1625	3010	2486	4645	1445	823	3498	94	Alive	Active follow-up	Alive or dead of other cause	Alive or dead due to cancer
42	White	Male	C41.9-Bone, NOS	Poorly differentiated; Grade III	Positive histology	9260/3: Ewing sarcoma	TX	NX	M1b	None; diagnosed at autopsy	Not recommended	No radiation and/or cancer-directed surgery	None/Unknown	Yes	60	999	999	40	Distant	Married (including common law)	1625	3010	2486	4645	1445	823	3498	33	Alive	Active follow-up	Alive or dead of other cause	Alive or dead due to cancer
22	White	Male	C40.2-Long bones of lower limb and associated joints	Undifferentiated; anaplastic; Grade IV	Positive histology	9260/3: Ewing sarcoma	T2	N0	M0	None; diagnosed at autopsy	Surgery performed	Radiation prior to surgery	Beam radiation	Yes	122	400	0	0	Regional	Single (never married)	1625	3010	2486	4645	1445	823	3498	85	Alive	Active follow-up	Alive or dead of other cause	Alive or dead due to cancer
18	White	Male	C41.2-Vertebral column	Unknown	Positive histology	9260/3: Ewing sarcoma	T1	N0	M0	None; diagnosed at autopsy	Surgery performed	Radiation after surgery	Beam radiation	No/Unknown	37	300	0	0	Localized	Single (never married)	1625	3010	2486	4645	1445	823	3498	10	Dead	Active follow-up	Dead (attributable to this cancer dx)	Alive or dead due to cancer
13	White	Male	C40.3-Short bones of lower limb and associated joints	Unknown	Positive histology	9260/3: Ewing sarcoma	TX	N0	M0	None; diagnosed at autopsy	Surgery performed	No radiation and/or cancer-directed surgery	None/Unknown	Yes	999	400	0	0	Regional	Single (never married)	1625	3010	2486	4645	1445	823	3498	90	Alive	Active follow-up	Alive or dead of other cause	Alive or dead due to cancer
14	White	Male	C41.4-Pelvic bones, sacrum, coccyx and associated joints	Unknown	Positive histology	9260/3: Ewing sarcoma	T2	N0	M1b	None; diagnosed at autopsy	Not recommended	No radiation and/or cancer-directed surgery	Beam radiation	Yes	147	600	0	40	Distant	Single (never married)	1625	3010	2486	4645	1445	823	3498	47	Dead	Active follow-up	Dead (attributable to this cancer dx)	Alive or dead due to cancer
44	White	Male	C40.2-Long bones of lower limb and associated joints	Unknown	Positive histology	9260/3: Ewing sarcoma	TX	N0	M1b	None; diagnosed at autopsy	Not recommended	No radiation and/or cancer-directed surgery	Beam radiation	Yes	999	700	0	40	Distant	Married (including common law)	1625	3010	2486	4645	1445	823	3498	3	Dead	Active follow-up	Dead (attributable to this cancer dx)	Alive or dead due to cancer
19	White	Male	C40.0-Long bones: upper limb, scapula, and associated joints	Undifferentiated; anaplastic; Grade IV	Positive histology	9260/3: Ewing sarcoma	T1	N0	M0	None; diagnosed at autopsy	Surgery performed	Radiation prior to surgery	Beam radiation	Yes	60	300	0	0	Localized	Single (never married)	1625	3010	2486	4645	1445	823	3498	90	Alive	Active follow-up	Alive or dead of other cause	Alive or dead due to cancer
11	White	Male	C49.3-Conn, subcutaneous, other soft tis: thorax	Unknown	Positive histology	9260/3: Ewing sarcoma	TX	N0	M0	None; diagnosed at autopsy	Surgery performed	No radiation and/or cancer-directed surgery	None/Unknown	Yes	999	100	0	0	Localized	Single (never married)	1625	3010	2486	4645	1445	823	3498	89	Alive	Active follow-up	Alive or dead of other cause	Alive or dead due to cancer
10	White	Female	C40.2-Long bones of lower limb and associated joints	Unknown	Positive histology	9260/3: Ewing sarcoma	TX	N0	M1a	None; diagnosed at autopsy	Surgery performed	No radiation and/or cancer-directed surgery	None/Unknown	Yes	999	400	0	30	Distant	Single (never married)	1625	3010	2486	4645	1445	823	3498	87	Alive	Active follow-up	Alive or dead of other cause	Alive or dead due to cancer
28	White	Male	C49.3-Conn, subcutaneous, other soft tis: thorax	Unknown	Positive histology	9260/3: Ewing sarcoma	T2b	N0	MX	None; diagnosed at autopsy	Surgery performed	No radiation and/or cancer-directed surgery	None/Unknown	Yes	270	620	0	99	Regional	Unknown	1625	3010	2486	4645	1445	823	3498	26	Dead	Active follow-up	Dead (attributable to this cancer dx)	Alive or dead due to cancer
16	White	Male	C38.4-Pleura, NOS	Undifferentiated; anaplastic; Grade IV	Positive histology	9260/3: Ewing sarcoma	NA	NA	NA	None; diagnosed at autopsy	Surgery performed	No radiation and/or cancer-directed surgery	None/Unknown	Yes	999	610	999	0	Unstaged	Single (never married)	1625	3010	2486	4645	1445	823	3498	86	Alive	Active follow-up	Alive or dead of other cause	Alive or dead due to cancer
32	White	Male	C41.4-Pelvic bones, sacrum, coccyx and associated joints	Unknown	Positive histology	9260/3: Ewing sarcoma	T2	N0	MX	None; diagnosed at autopsy	Surgery performed	No radiation and/or cancer-directed surgery	None/Unknown	Yes	130	800	0	99	Distant	Unknown	1625	3010	2486	4645	1445	823	3498	78	Alive	Active follow-up	Alive or dead of other cause	Alive or dead due to cancer
19	White	Male	C40.3-Short bones of lower limb and associated joints	Undifferentiated; anaplastic; Grade IV	Positive histology	9260/3: Ewing sarcoma	T2	N1	M0	None; diagnosed at autopsy	Surgery performed	No radiation and/or cancer-directed surgery	None/Unknown	Yes	137	600	100	0	Regional	Single (never married)	1625	3010	2486	4645	1445	823	3498	12	Dead	Active follow-up	Dead (attributable to this cancer dx)	Alive or dead due to cancer
41	White	Male	C49.2-Conn, subcutaneous, other soft tis: lower limb, hip	Undifferentiated; anaplastic; Grade IV	Positive histology	9260/3: Ewing sarcoma	T2b	N0	M0	None; diagnosed at autopsy	Surgery performed	No radiation and/or cancer-directed surgery	None/Unknown	Yes	100	620	0	0	Regional	Married (including common law)	1625	3010	2486	4645	1445	823	3498	74	Alive	Active follow-up	Alive or dead of other cause	Alive or dead due to cancer
44	White	Male	C41.4-Pelvic bones, sacrum, coccyx and associated joints	Unknown	Positive histology	9260/3: Ewing sarcoma	TX	N0	M1b	None; diagnosed at autopsy	Not recommended	No radiation and/or cancer-directed surgery	None/Unknown	No/Unknown	40	999	0	40	Distant	Married (including common law)	1625	3010	2486	4645	1445	823	3498	6	Dead	Active follow-up	Dead (attributable to this cancer dx)	Alive or dead due to cancer
8	White	Female	C41.2-Vertebral column	Unknown	Positive histology	9260/3: Ewing sarcoma	TX	N0	M0	None; diagnosed at autopsy	Surgery performed	Radiation after surgery	Beam radiation	Yes	999	400	0	0	Regional	Single (never married)	1625	3010	2486	4645	1445	823	3498	78	Alive	Active follow-up	Alive or dead of other cause	Alive or dead due to cancer
28	White	Male	C41.3-Rib, sternum, clavicle and associated joints	Unknown	Positive histology	9260/3: Ewing sarcoma	T2	NX	M1b	None; diagnosed at autopsy	Not recommended	No radiation and/or cancer-directed surgery	Beam radiation	Yes	100	600	999	40	Distant	Married (including common law)	1625	3010	2486	4645	1445	823	3498	16	Dead	Active follow-up	Dead (attributable to this cancer dx)	Alive or dead due to cancer
36	White	Male	C49.2-Conn, subcutaneous, other soft tis: lower limb, hip	Poorly differentiated; Grade III	Positive histology	9260/3: Ewing sarcoma	T2b	N1	M0	None; diagnosed at autopsy	Surgery performed	Radiation after surgery	Beam radiation	Yes	90	420	100	0	Regional	Single (never married)	1625	3010	2486	4645	1445	823	3498	78	Alive	Active follow-up	Alive or dead of other cause	Alive or dead due to cancer
25	Other (American Indian/AK Native, Asian/Pacific Islander)	Male	C48.0-Retroperitoneum	Poorly differentiated; Grade III	Positive histology	9260/3: Ewing sarcoma	T2b	N0	M1	None; diagnosed at autopsy	Not recommended	No radiation and/or cancer-directed surgery	None/Unknown	Yes	166	400	0	40	Distant	Married (including common law)	1625	3010	2486	4645	1445	823	3498	78	Alive	Active follow-up	Alive or dead of other cause	Alive or dead due to cancer
19	White	Male	C40.2-Long bones of lower limb and associated joints	Undifferentiated; anaplastic; Grade IV	Positive histology	9260/3: Ewing sarcoma	T2	N0	M0	None; diagnosed at autopsy	Surgery performed	Radiation prior to surgery	Beam radiation	Yes	120	300	0	0	Localized	Single (never married)	1625	3010	2486	4645	1445	823	3498	11	Dead	Active follow-up	Dead (attributable to this cancer dx)	Alive or dead due to cancer
12	White	Female	C41.4-Pelvic bones, sacrum, coccyx and associated joints	Unknown	Positive histology	9260/3: Ewing sarcoma	TX	N0	M1b	None; diagnosed at autopsy	Surgery performed	No radiation and/or cancer-directed surgery	None/Unknown	Yes	999	400	0	50	Distant	Single (never married)	1625	3010	2486	4645	1445	823	3498	22	Dead	Active follow-up	Dead (attributable to this cancer dx)	Alive or dead due to cancer
9	White	Female	C40.2-Long bones of lower limb and associated joints	Undifferentiated; anaplastic; Grade IV	Positive histology	9260/3: Ewing sarcoma	T2	N1	M1b	None; diagnosed at autopsy	Surgery performed	No radiation and/or cancer-directed surgery	None/Unknown	Yes	160	400	100	40	Distant	Single (never married)	1625	3010	2486	4645	1445	823	3498	43	Dead	Active follow-up	Dead (attributable to this cancer dx)	Alive or dead due to cancer
17	White	Male	C40.2-Long bones of lower limb and associated joints	Unknown	Positive histology	9260/3: Ewing sarcoma	T2	N0	M0	None; diagnosed at autopsy	Surgery performed	No radiation and/or cancer-directed surgery	None/Unknown	Yes	90	100	0	0	Localized	Single (never married)	1625	3010	2486	4645	1445	823	3498	67	Alive	Active follow-up	Alive or dead of other cause	Alive or dead due to cancer
29	White	Male	C38.2-Posterior mediastinum	Unknown	Positive histology	9260/3: Ewing sarcoma	T2b	N0	M0	None; diagnosed at autopsy	Surgery performed	No radiation and/or cancer-directed surgery	None/Unknown	Yes	110	800	0	0	Blank(s)	Married (including common law)	1625	3010	2486	4645	1445	823	3498	77	Alive	Active follow-up	Alive or dead of other cause	Alive or dead due to cancer
14	White	Female	C40.2-Long bones of lower limb and associated joints	Unknown	Positive histology	9260/3: Ewing sarcoma	T2	N0	M0	None; diagnosed at autopsy	Surgery performed	No radiation and/or cancer-directed surgery	None/Unknown	Yes	90	100	0	0	Localized	Single (never married)	1625	3010	2486	4645	1445	823	3498	75	Alive	Active follow-up	Alive or dead of other cause	Alive or dead due to cancer
12	White	Female	C41.0-Bones of skull and face and associated joints	Unknown	Positive histology	9260/3: Ewing sarcoma	T1	N0	M0	None; diagnosed at autopsy	Surgery performed	No radiation and/or cancer-directed surgery	None/Unknown	Yes	70	400	0	0	Regional	Single (never married)	1625	3010	2486	4645	1445	823	3498	74	Alive	Active follow-up	Alive or dead of other cause	Alive or dead due to cancer
46	White	Female	C41.2-Vertebral column	Unknown	Positive histology	9260/3: Ewing sarcoma	TX	N0	M0	None; diagnosed at autopsy	Surgery performed	Radiation after surgery	Radiation, NOS method or source not specified	Yes	999	300	0	0	Localized	Single (never married)	1625	3010	2486	4645	1445	823	3498	75	Alive	Active follow-up	Alive or dead of other cause	Alive or dead due to cancer
25	White	Male	C41.0-Bones of skull and face and associated joints	Undifferentiated; anaplastic; Grade IV	Positive histology	9260/3: Ewing sarcoma	T1	N0	M0	None; diagnosed at autopsy	Surgery performed	Radiation after surgery	Beam radiation	Yes	42	800	0	0	Distant	Single (never married)	1625	3010	2486	4645	1445	823	3498	40	Alive	Active follow-up	Alive or dead of other cause	Alive or dead due to cancer
71	White	Male	C41.9-Bone, NOS	Unknown	Unknown	9260/3: Ewing sarcoma	TX	NX	MX	None; diagnosed at autopsy	Not recommended	No radiation and/or cancer-directed surgery	None/Unknown	No/Unknown	999	999	999	99	Unstaged	Divorced	1625	3010	2486	4645	1445	823	3498	2	Dead	Active follow-up	Dead (attributable to this cancer dx)	Alive or dead due to cancer
38	White	Female	C64.9-Kidney, NOS	Unknown	Positive histology	9260/3: Ewing sarcoma	NA	NA	NA	None; diagnosed at autopsy	Surgery performed	Radiation after surgery	Beam radiation	Yes	115	600	0	0	Regional	Married (including common law)	1625	3010	2486	4645	1445	823	3498	70	Alive	Active follow-up	Alive or dead of other cause	Alive or dead due to cancer
37	Black	Male	C49.1-Conn, subcutaneous, other soft tis: upr limb, shoulder	Unknown	Positive histology	9260/3: Ewing sarcoma	T1b	NX	MX	None; diagnosed at autopsy	Surgery performed	No radiation and/or cancer-directed surgery	None/Unknown	Yes	47	420	999	99	Regional	Single (never married)	1625	3010	2486	4645	1445	823	3498	70	Alive	Active follow-up	Alive or dead of other cause	Alive or dead due to cancer
14	White	Female	C41.3-Rib, sternum, clavicle and associated joints	Unknown	Positive histology	9260/3: Ewing sarcoma	T1	N0	M0	None; diagnosed at autopsy	Not recommended	No radiation and/or cancer-directed surgery	None/Unknown	Yes	47	800	0	0	Distant	Single (never married)	1625	3010	2486	4645	1445	823	3498	67	Alive	Active follow-up	Alive or dead of other cause	Alive or dead due to cancer
44	Other (American Indian/AK Native, Asian/Pacific Islander)	Male	C47.9-Autonomic nervous system, NOS	Unknown	Positive histology	9260/3: Ewing sarcoma	TX	N0	M1	None; diagnosed at autopsy	Surgery performed	No radiation and/or cancer-directed surgery	None/Unknown	Yes	13	999	0	40	Distant	Married (including common law)	1625	3010	2486	4645	1445	823	3498	6	Dead	Active follow-up	Dead (attributable to this cancer dx)	Alive or dead due to cancer
13	White	Male	C40.2-Long bones of lower limb and associated joints	Unknown	Positive histology	9260/3: Ewing sarcoma	TX	N0	M0	None; diagnosed at autopsy	Surgery performed	Radiation after surgery	Beam radiation	Yes	999	400	0	0	Regional	Single (never married)	1625	3010	2486	4645	1445	823	3498	66	Alive	Active follow-up	Alive or dead of other cause	Alive or dead due to cancer
18	White	Male	C49.2-Conn, subcutaneous, other soft tis: lower limb, hip	Unknown	Positive histology	9260/3: Ewing sarcoma	T1NOS	N0	M0	None; diagnosed at autopsy	Surgery performed	No radiation and/or cancer-directed surgery	None/Unknown	Yes	20	100	0	0	Localized	Single (never married)	1625	3010	2486	4645	1445	823	3498	65	Alive	Active follow-up	Alive or dead of other cause	Alive or dead due to cancer
58	White	Male	C72.9-Nervous system, NOS	Undifferentiated; anaplastic; Grade IV	Positive histology	9260/3: Ewing sarcoma	NA	NA	NA	None; diagnosed at autopsy	Surgery performed	No radiation and/or cancer-directed surgery	None/Unknown	Yes	999	999	988	40	Unstaged	Unknown	1625	3010	2486	4645	1445	823	3498	4	Dead	Active follow-up	Dead (attributable to this cancer dx)	Alive or dead due to cancer
15	White	Male	C48.0-Retroperitoneum	Unknown	Positive histology	9260/3: Ewing sarcoma	T2b	N0	M0	None; diagnosed at autopsy	Surgery performed	Radiation after surgery	Beam radiation	Yes	73	300	0	0	Localized	Single (never married)	1625	3010	2486	4645	1445	823	3498	66	Alive	Active follow-up	Alive or dead of other cause	Alive or dead due to cancer
24	White	Female	C56.9-Ovary	Unknown	Positive histology	9260/3: Ewing sarcoma	NA	NA	NA	None; diagnosed at autopsy	Surgery performed	No radiation and/or cancer-directed surgery	None/Unknown	Yes	38	750	100	0	Distant	Single (never married)	1625	3010	2486	4645	1445	823	3498	50	Dead	Active follow-up	Dead (attributable to this cancer dx)	Alive or dead due to cancer
51	Black	Male	C49.2-Conn, subcutaneous, other soft tis: lower limb, hip	Unknown	Positive exfoliative cytology, no positive histology	9260/3: Ewing sarcoma	T2NOS	NX	MX	None; diagnosed at autopsy	Surgery performed	No radiation and/or cancer-directed surgery	None/Unknown	Yes	123	400	999	99	Regional	Married (including common law)	1625	3010	2486	4645	1445	823	3498	18	Dead	Active follow-up	Dead (attributable to this cancer dx)	Alive or dead due to cancer
31	White	Male	C41.2-Vertebral column	Unknown	Positive histology	9260/3: Ewing sarcoma	TX	N0	M0	None; diagnosed at autopsy	Surgery performed	Radiation after surgery	Beam radiation	Yes	999	600	0	0	Regional	Single (never married)	1625	3010	2486	4645	1445	823	3498	65	Alive	Active follow-up	Alive or dead of other cause	Alive or dead due to cancer
9	White	Male	C41.4-Pelvic bones, sacrum, coccyx and associated joints	Undifferentiated; anaplastic; Grade IV	Positive histology	9260/3: Ewing sarcoma	T2	N0	M0	None; diagnosed at autopsy	Not recommended	No radiation and/or cancer-directed surgery	Beam radiation	Yes	150	400	0	0	Regional	Single (never married)	1625	3010	2486	4645	1445	823	3498	63	Alive	Active follow-up	Alive or dead of other cause	Alive or dead due to cancer
46	White	Male	C49.4-Conn, subcutaneous, other soft tis: abdomen	Undifferentiated; anaplastic; Grade IV	Positive histology	9260/3: Ewing sarcoma	T2NOS	N0	M0	None; diagnosed at autopsy	Recommended, unknown if performed	No radiation and/or cancer-directed surgery	None/Unknown	Yes	114	100	0	0	Localized	Married (including common law)	1625	3010	2486	4645	1445	823	3498	66	Alive	Active follow-up	Alive or dead of other cause	Alive or dead due to cancer
18	Other (American Indian/AK Native, Asian/Pacific Islander)	Female	C41.3-Rib, sternum, clavicle and associated joints	Unknown	Positive histology	9260/3: Ewing sarcoma	T1	N0	M0	None; diagnosed at autopsy	Surgery performed	No radiation and/or cancer-directed surgery	None/Unknown	Yes	40	800	0	0	Distant	Single (never married)	1625	3010	2486	4645	1445	823	3498	30	Dead	Active follow-up	Dead (attributable to this cancer dx)	Alive or dead due to cancer
51	White	Female	C49.2-Conn, subcutaneous, other soft tis: lower limb, hip	Unknown	Positive histology	9260/3: Ewing sarcoma	T1a	N0	M0	None; diagnosed at autopsy	Recommended, unknown if performed	No radiation and/or cancer-directed surgery	None/Unknown	Yes	27	110	0	0	Localized	Unknown	1625	3010	2486	4645	1445	823	3498	10	Alive	Active follow-up	Alive or dead of other cause	Alive or dead due to cancer
16	White	Male	C40.2-Long bones of lower limb and associated joints	Unknown	Positive histology	9260/3: Ewing sarcoma	T3	N0	M1b	None; diagnosed at autopsy	Not recommended	No radiation and/or cancer-directed surgery	None/Unknown	Yes	999	820	0	40	Distant	Single (never married)	1625	3010	2486	4645	1445	823	3498	59	Alive	Active follow-up	Alive or dead of other cause	Alive or dead due to cancer
15	White	Male	C40.2-Long bones of lower limb and associated joints	Undifferentiated; anaplastic; Grade IV	Positive histology	9260/3: Ewing sarcoma	T1	N0	M0	None; diagnosed at autopsy	Surgery performed	No radiation and/or cancer-directed surgery	None/Unknown	Yes	80	400	0	0	Regional	Single (never married)	1625	3010	2486	4645	1445	823	3498	61	Alive	Active follow-up	Alive or dead of other cause	Alive or dead due to cancer
52	Other (American Indian/AK Native, Asian/Pacific Islander)	Male	C49.5-Conn, subcutaneous, other soft tis: pelvis	Unknown	Positive histology	9260/3: Ewing sarcoma	TX	NX	M1	None; diagnosed at autopsy	Not recommended	No radiation and/or cancer-directed surgery	None/Unknown	No/Unknown	999	999	999	40	Distant	Single (never married)	1625	3010	2486	4645	1445	823	3498	0	Dead	Active follow-up	Dead (attributable to this cancer dx)	Alive or dead due to cancer
17	White	Female	C40.0-Long bones: upper limb, scapula, and associated joints	Poorly differentiated; Grade III	Positive histology	9260/3: Ewing sarcoma	T2	N0	M1a	None; diagnosed at autopsy	Surgery performed	Radiation after surgery	Beam radiation	Yes	113	400	0	30	Distant	Single (never married)	1625	3010	2486	4645	1445	823	3498	59	Alive	Active follow-up	Alive or dead of other cause	Alive or dead due to cancer
14	White	Male	C41.4-Pelvic bones, sacrum, coccyx and associated joints	Undifferentiated; anaplastic; Grade IV	Positive histology	9260/3: Ewing sarcoma	T2	N0	M0	None; diagnosed at autopsy	Not recommended	No radiation and/or cancer-directed surgery	Beam radiation	Yes	150	600	0	0	Regional	Single (never married)	1625	3010	2486	4645	1445	823	3498	24	Dead	Active follow-up	Dead (attributable to this cancer dx)	Alive or dead due to cancer
54	White	Female	C49.8-Overlap conn, subcutaneous, and other soft tissues	Unknown	Positive histology	9260/3: Ewing sarcoma	T2b	N0	M1	None; diagnosed at autopsy	Not recommended	No radiation and/or cancer-directed surgery	None/Unknown	No/Unknown	290	800	0	50	Distant	Single (never married)	1625	3010	2486	4645	1445	823	3498	0	Dead	Active follow-up	Alive or dead of other cause	Dead (attributable to causes other than this cancer dx)
25	White	Male	C40.0-Long bones: upper limb, scapula, and associated joints	Unknown	Positive histology	9260/3: Ewing sarcoma	T2	N0	M1b	None; diagnosed at autopsy	Not recommended	No radiation and/or cancer-directed surgery	Beam radiation	Yes	218	400	0	40	Distant	Single (never married)	1625	3010	2486	4645	1445	823	3498	57	Alive	Active follow-up	Alive or dead of other cause	Alive or dead due to cancer
27	White	Male	C41.4-Pelvic bones, sacrum, coccyx and associated joints	Undifferentiated; anaplastic; Grade IV	Positive histology	9260/3: Ewing sarcoma	TX	N0	M1a	None; diagnosed at autopsy	Not recommended	No radiation and/or cancer-directed surgery	Beam radiation	Yes	999	300	0	30	Distant	Single (never married)	1625	3010	2486	4645	1445	823	3498	14	Dead	Active follow-up	Dead (attributable to this cancer dx)	Alive or dead due to cancer
11	White	Female	C72.0-Spinal cord	Unknown	Positive histology	9260/3: Ewing sarcoma	NA	NA	NA	None; diagnosed at autopsy	Surgery performed	Radiation after surgery	Beam radiation	Yes	999	300	988	0	Unstaged	Single (never married)	1625	3010	2486	4645	1445	823	3498	48	Alive	Active follow-up	Alive or dead of other cause	Alive or dead due to cancer
29	White	Male	C40.2-Long bones of lower limb and associated joints	Unknown	Positive histology	9261/3: Adamantinoma of long bones	T1	N0	M0	None; diagnosed at autopsy	Surgery performed	No radiation and/or cancer-directed surgery	None/Unknown	No/Unknown	33	100	0	0	Localized	Married (including common law)	1625	3010	2486	4645	1445	823	3498	49	Alive	Active follow-up	Alive or dead of other cause	Alive or dead due to cancer
13	White	Female	C40.0-Long bones: upper limb, scapula, and associated joints	Undifferentiated; anaplastic; Grade IV	Positive histology	9260/3: Ewing sarcoma	T1	N0	M0	None; diagnosed at autopsy	Surgery performed	No radiation and/or cancer-directed surgery	None/Unknown	Yes	80	400	0	0	Regional	Single (never married)	1625	3010	2486	4645	1445	823	3498	56	Alive	Active follow-up	Alive or dead of other cause	Alive or dead due to cancer
29	White	Female	C49.3-Conn, subcutaneous, other soft tis: thorax	Poorly differentiated; Grade III	Positive histology	9260/3: Ewing sarcoma	T1b	N0	M1	None; diagnosed at autopsy	Surgery performed	No radiation and/or cancer-directed surgery	None/Unknown	Yes	45	120	0	40	Distant	Married (including common law)	1625	3010	2486	4645	1445	823	3498	42	Alive	Active follow-up	Alive or dead of other cause	Alive or dead due to cancer
20	White	Female	C40.1-Short bones of upper limb and associated joints	Undifferentiated; anaplastic; Grade IV	Positive histology	9260/3: Ewing sarcoma	T1	N0	M0	None; diagnosed at autopsy	Surgery performed	No radiation and/or cancer-directed surgery	None/Unknown	Yes	37	300	0	0	Localized	Single (never married)	1625	3010	2486	4645	1445	823	3498	56	Alive	Active follow-up	Alive or dead of other cause	Alive or dead due to cancer
5	White	Female	C41.0-Bones of skull and face and associated joints	Unknown	Positive histology	9260/3: Ewing sarcoma	TX	N0	M0	None; diagnosed at autopsy	Surgery performed	Radiation after surgery	Beam radiation	Yes	999	600	0	0	Regional	Single (never married)	1625	3010	2486	4645	1445	823	3498	53	Alive	Active follow-up	Alive or dead of other cause	Alive or dead due to cancer
10	White	Male	C41.3-Rib, sternum, clavicle and associated joints	Unknown	Positive histology	9260/3: Ewing sarcoma	T1	N0	M0	None; diagnosed at autopsy	Surgery performed	Radiation after surgery	Beam radiation	Yes	57	100	0	0	Localized	Single (never married)	1625	3010	2486	4645	1445	823	3498	50	Alive	Active follow-up	Alive or dead of other cause	Alive or dead due to cancer
43	Other (American Indian/AK Native, Asian/Pacific Islander)	Male	C49.2-Conn, subcutaneous, other soft tis: lower limb, hip	Unknown	Positive histology	9260/3: Ewing sarcoma	TX	N0	M1	None; diagnosed at autopsy	Not recommended	No radiation and/or cancer-directed surgery	None/Unknown	Yes	202	999	0	40	Distant	Single (never married)	1625	3010	2486	4645	1445	823	3498	14	Dead	Active follow-up	Dead (attributable to this cancer dx)	Alive or dead due to cancer
24	White	Female	C40.2-Long bones of lower limb and associated joints	Unknown	Positive histology	9260/3: Ewing sarcoma	T1	N0	M0	None; diagnosed at autopsy	Surgery performed	No radiation and/or cancer-directed surgery	None/Unknown	Yes	80	100	0	0	Localized	Single (never married)	1625	3010	2486	4645	1445	823	3498	47	Alive	Active follow-up	Alive or dead of other cause	Alive or dead due to cancer
16	White	Male	C64.9-Kidney, NOS	Unknown	Positive histology	9260/3: Ewing sarcoma	NA	NA	NA	None; diagnosed at autopsy	Surgery performed	No radiation and/or cancer-directed surgery	None/Unknown	Yes	55	300	0	0	Localized	Single (never married)	1625	3010	2486	4645	1445	823	3498	52	Alive	Active follow-up	Alive or dead of other cause	Alive or dead due to cancer
16	White	Female	C50.1-Central portion of breast	Poorly differentiated; Grade III	Positive histology	9260/3: Ewing sarcoma	NA	NA	NA	None; diagnosed at autopsy	Surgery performed	Radiation after surgery	Beam radiation	Yes	58	100	0	0	Localized	Single (never married)	1625	3010	2486	4645	1445	823	3498	54	Alive	Active follow-up	Alive or dead of other cause	Alive or dead due to cancer
26	White	Female	C40.1-Short bones of upper limb and associated joints	Undifferentiated; anaplastic; Grade IV	Positive histology	9260/3: Ewing sarcoma	TX	N0	M0	None; diagnosed at autopsy	Surgery performed	Radiation after surgery	Beam radiation	Yes	999	300	0	0	Localized	Single (never married)	1625	3010	2486	4645	1445	823	3498	41	Alive	Active follow-up	Alive or dead of other cause	Alive or dead due to cancer
44	White	Male	C41.1-Mandible	Unknown	Positive histology	9260/3: Ewing sarcoma	TX	N1	M1b	None; diagnosed at autopsy	Not recommended	No radiation and/or cancer-directed surgery	None/Unknown	Yes	999	999	100	40	Distant	Single (never married)	1625	3010	2486	4645	1445	823	3498	22	Dead	Active follow-up	Alive or dead of other cause	Dead (attributable to causes other than this cancer dx)
28	Black	Female	C40.2-Long bones of lower limb and associated joints	Poorly differentiated; Grade III	Positive histology	9260/3: Ewing sarcoma	T2	N0	M1a	None; diagnosed at autopsy	Not recommended	No radiation and/or cancer-directed surgery	None/Unknown	Yes	100	100	0	30	Distant	Single (never married)	1625	3010	2486	4645	1445	823	3498	42	Alive	Active follow-up	Alive or dead of other cause	Alive or dead due to cancer
3	White	Male	C41.3-Rib, sternum, clavicle and associated joints	Unknown	Positive histology	9260/3: Ewing sarcoma	TX	N0	M0	None; diagnosed at autopsy	Surgery performed	No radiation and/or cancer-directed surgery	Refused	No/Unknown	999	300	0	0	Localized	Single (never married)	1625	3010	2486	4645	1445	823	3498	39	Alive	Active follow-up	Alive or dead of other cause	Alive or dead due to cancer
21	White	Male	C40.2-Long bones of lower limb and associated joints	Unknown	Positive histology	9260/3: Ewing sarcoma	T2	N0	M0	None; diagnosed at autopsy	Not recommended	No radiation and/or cancer-directed surgery	None/Unknown	Yes	290	100	0	0	Localized	Single (never married)	1625	3010	2486	4645	1445	823	3498	27	Dead	Active follow-up	Dead (attributable to this cancer dx)	Alive or dead due to cancer
10	White	Male	C40.2-Long bones of lower limb and associated joints	Unknown	Positive histology	9260/3: Ewing sarcoma	T1	N0	M0	None; diagnosed at autopsy	Surgery performed	No radiation and/or cancer-directed surgery	None/Unknown	Yes	60	400	0	0	Regional	Single (never married)	1625	3010	2486	4645	1445	823	3498	35	Alive	Active follow-up	Alive or dead of other cause	Alive or dead due to cancer
56	White	Female	C41.2-Vertebral column	Unknown	Positive histology	9260/3: Ewing sarcoma	T3	N0	M0	None; diagnosed at autopsy	Not recommended	No radiation and/or cancer-directed surgery	None/Unknown	Yes	999	820	0	0	Distant	Married (including common law)	1625	3010	2486	4645	1445	823	3498	20	Dead	Active follow-up	Alive or dead of other cause	Dead (attributable to causes other than this cancer dx)
34	White	Male	C41.0-Bones of skull and face and associated joints	Unknown	Positive histology	9260/3: Ewing sarcoma	T1	N0	M0	None; diagnosed at autopsy	Surgery performed	No radiation and/or cancer-directed surgery	None/Unknown	Yes	9	100	0	0	Localized	Single (never married)	1625	3010	2486	4645	1445	823	3498	26	Alive	Active follow-up	Alive or dead of other cause	Alive or dead due to cancer
15	White	Male	C49.6-Conn, subcutaneous, other soft tis: trunk, NOS	Unknown	Positive histology	9260/3: Ewing sarcoma	T2b	N0	M0	None; diagnosed at autopsy	Not recommended	No radiation and/or cancer-directed surgery	None/Unknown	No/Unknown	146	600	0	0	Regional	Single (never married)	1625	3010	2486	4645	1445	823	3498	37	Alive	Active follow-up	Alive or dead of other cause	Alive or dead due to cancer
21	White	Male	C41.9-Bone, NOS	Unknown	Positive histology	9260/3: Ewing sarcoma	TX	N0	M1b	None; diagnosed at autopsy	Not recommended	No radiation and/or cancer-directed surgery	Beam radiation	Yes	999	999	0	40	Distant	Separated	1625	3010	2486	4645	1445	823	3498	38	Dead	Active follow-up	Dead (attributable to this cancer dx)	Alive or dead due to cancer
33	White	Female	C21.1-Anal canal	Undifferentiated; anaplastic; Grade IV	Positive histology	9260/3: Ewing sarcoma	NA	NA	NA	None; diagnosed at autopsy	Not recommended	No radiation and/or cancer-directed surgery	None/Unknown	No/Unknown	20	999	999	99	Unstaged	Single (never married)	1625	3010	2486	4645	1445	823	3498	14	Alive	Active follow-up	Alive or dead of other cause	Alive or dead due to cancer
13	White	Female	C40.2-Long bones of lower limb and associated joints	Undifferentiated; anaplastic; Grade IV	Positive histology	9260/3: Ewing sarcoma	T2	N0	M0	None; diagnosed at autopsy	Surgery performed	Radiation prior to surgery	Beam radiation	Yes	100	400	0	0	Regional	Single (never married)	1625	3010	2486	4645	1445	823	3498	39	Alive	Active follow-up	N/A not first tumor	N/A not first tumor
18	White	Male	C41.4-Pelvic bones, sacrum, coccyx and associated joints	Unknown	Positive histology	9260/3: Ewing sarcoma	T2	N0	M1b	None; diagnosed at autopsy	Not recommended	No radiation and/or cancer-directed surgery	None/Unknown	Yes	100	100	0	40	Distant	Single (never married)	1625	3010	2486	4645	1445	823	3498	36	Alive	Active follow-up	Alive or dead of other cause	Alive or dead due to cancer
35	White	Female	C41.4-Pelvic bones, sacrum, coccyx and associated joints	Unknown	Positive histology	9260/3: Ewing sarcoma	T2	N0	M1b	None; diagnosed at autopsy	Not recommended	No radiation and/or cancer-directed surgery	None/Unknown	Yes	160	400	0	50	Distant	Single (never married)	1625	3010	2486	4645	1445	823	3498	12	Dead	Active follow-up	Dead (attributable to this cancer dx)	Alive or dead due to cancer
3	White	Female	C41.2-Vertebral column	Unknown	Positive histology	9260/3: Ewing sarcoma	TX	N0	M1a	None; diagnosed at autopsy	Surgery performed	No radiation and/or cancer-directed surgery	None/Unknown	Yes	999	999	0	30	Distant	Single (never married)	1625	3010	2486	4645	1445	823	3498	10	Dead	Active follow-up	Dead (attributable to this cancer dx)	Alive or dead due to cancer
24	White	Female	C49.3-Conn, subcutaneous, other soft tis: thorax	Unknown	Positive histology	9260/3: Ewing sarcoma	T2a	N0	M0	None; diagnosed at autopsy	Surgery performed	No radiation and/or cancer-directed surgery	None/Unknown	Yes	86	110	0	0	Localized	Single (never married)	1625	3010	2486	4645	1445	823	3498	25	Alive	Active follow-up	Alive or dead of other cause	Alive or dead due to cancer
28	White	Male	C40.2-Long bones of lower limb and associated joints	Unknown	Positive histology	9260/3: Ewing sarcoma	TX	N0	M0	None; diagnosed at autopsy	Not recommended	No radiation and/or cancer-directed surgery	None/Unknown	No/Unknown	999	300	0	0	Localized	Single (never married)	1625	3010	2486	4645	1445	823	3498	0	Alive	Active follow-up	Alive or dead of other cause	Alive or dead due to cancer
40	Other (American Indian/AK Native, Asian/Pacific Islander)	Female	C55.9-Uterus, NOS	Unknown	Positive histology	9260/3: Ewing sarcoma	NA	NA	NA	None; diagnosed at autopsy	Not recommended	No radiation and/or cancer-directed surgery	None/Unknown	No/Unknown	130	688	0	40	Distant	Single (never married)	1625	3010	2486	4645	1445	823	3498	0	Dead	Active follow-up	N/A not first tumor	N/A not first tumor
30	White	Male	C49.5-Conn, subcutaneous, other soft tis: pelvis	Unknown	Positive histology	9260/3: Ewing sarcoma	T2b	N0	M0	None; diagnosed at autopsy	Not recommended	No radiation and/or cancer-directed surgery	Beam radiation	Yes	105	620	0	0	Regional	Married (including common law)	1625	3010	2486	4645	1445	823	3498	29	Dead	Active follow-up	Dead (attributable to this cancer dx)	Alive or dead due to cancer
38	White	Female	C52.9-Vagina, NOS	Unknown	Positive histology	9260/3: Ewing sarcoma	NA	NA	NA	None; diagnosed at autopsy	Surgery performed	No radiation and/or cancer-directed surgery	None/Unknown	Yes	58	620	0	0	Blank(s)	Married (including common law)	1625	3010	2486	4645	1445	823	3498	11	Dead	Active follow-up	Dead (attributable to this cancer dx)	Alive or dead due to cancer
13	White	Male	C49.1-Conn, subcutaneous, other soft tis: upr limb, shoulder	Unknown	Positive histology	9260/3: Ewing sarcoma	T2b	N0	M1	None; diagnosed at autopsy	Surgery performed	No radiation and/or cancer-directed surgery	None/Unknown	Yes	88	600	0	40	Distant	Single (never married)	1625	3010	2486	4645	1445	823	3498	11	Dead	Active follow-up	Dead (attributable to this cancer dx)	Alive or dead due to cancer
15	White	Male	C49.2-Conn, subcutaneous, other soft tis: lower limb, hip	Unknown	Positive histology	9260/3: Ewing sarcoma	T2b	N0	M0	None; diagnosed at autopsy	Surgery performed	No radiation and/or cancer-directed surgery	None/Unknown	Yes	62	120	0	0	Localized	Single (never married)	1625	3010	2486	4645	1445	823	3498	25	Alive	Active follow-up	Alive or dead of other cause	Alive or dead due to cancer
9	White	Female	C49.3-Conn, subcutaneous, other soft tis: thorax	Unknown	Positive histology	9260/3: Ewing sarcoma	T2b	N0	M0	None; diagnosed at autopsy	Surgery performed	No radiation and/or cancer-directed surgery	None/Unknown	Yes	60	320	0	0	Localized	Single (never married)	1625	3010	2486	4645	1445	823	3498	27	Alive	Active follow-up	Alive or dead of other cause	Alive or dead due to cancer
24	White	Female	C49.6-Conn, subcutaneous, other soft tis: trunk, NOS	Unknown	Positive histology	9260/3: Ewing sarcoma	TX	N0	M0	None; diagnosed at autopsy	Surgery performed	No radiation and/or cancer-directed surgery	None/Unknown	Yes	999	100	0	0	Localized	Single (never married)	1625	3010	2486	4645	1445	823	3498	17	Alive	Active follow-up	Alive or dead of other cause	Alive or dead due to cancer
17	White	Female	C49.5-Conn, subcutaneous, other soft tis: pelvis	Unknown	Positive histology	9260/3: Ewing sarcoma	TX	N0	M0	None; diagnosed at autopsy	Surgery performed	No radiation and/or cancer-directed surgery	None/Unknown	Yes	999	110	0	0	Localized	Single (never married)	1625	3010	2486	4645	1445	823	3498	15	Alive	Active follow-up	Alive or dead of other cause	Alive or dead due to cancer
53	White	Female	C54.2-Myometrium	Unknown	Positive histology	9260/3: Ewing sarcoma	NA	NA	NA	Non-primary surgical procedure performed	Surgery performed	No radiation and/or cancer-directed surgery	None/Unknown	Yes	150	693	999	0	Regional	Married (including common law)	1625	3010	2486	4645	1445	823	3498	9	Dead	Active follow-up	Dead (attributable to this cancer dx)	Alive or dead due to cancer
26	White	Male	C41.2-Vertebral column	Unknown	Positive histology	9260/3: Ewing sarcoma	TX	NX	MX	Unknown; death certificate only	Not recommended	No radiation and/or cancer-directed surgery	None/Unknown	No/Unknown	999	999	999	99	Unstaged	Married (including common law)	1625	3010	2486	4645	1445	823	3498	94	Alive	Active follow-up	Alive or dead of other cause	Alive or dead due to cancer
0	White	Female	C49.3-Conn, subcutaneous, other soft tis: thorax	Unknown	Positive histology	9260/3: Ewing sarcoma	TX	NX	MX	None; diagnosed at autopsy	Not recommended	No radiation and/or cancer-directed surgery	None/Unknown	No/Unknown	999	999	999	99	Unstaged	Single (never married)	1625	3010	2486	4645	1445	823	3498	25	Alive	Active follow-up	Alive or dead of other cause	Alive or dead due to cancer
25	White	Male	C49.4-Conn, subcutaneous, other soft tis: abdomen	Unknown	Positive histology	9260/3: Ewing sarcoma	T2b	N0	M0	None; diagnosed at autopsy	Not recommended	No radiation and/or cancer-directed surgery	None/Unknown	Yes	110	320	0	0	Localized	Single (never married)	1625	3010	2486	4645	1445	823	3498	10	Alive	Active follow-up	Alive or dead of other cause	Alive or dead due to cancer
3	White	Female	C40.0-Long bones: upper limb, scapula, and associated joints	Unknown	Positive histology	9260/3: Ewing sarcoma	T1	N0	M0	None; diagnosed at autopsy	Surgery performed	No radiation and/or cancer-directed surgery	None/Unknown	Yes	77	310	0	0	Localized	Single (never married)	1625	3010	2486	4645	1445	823	3498	6	Alive	Active follow-up	Alive or dead of other cause	Alive or dead due to cancer
10	White	Female	C41.1-Mandible	Unknown	Positive histology	9260/3: Ewing sarcoma	T1	N1	M0	None; diagnosed at autopsy	Not recommended	No radiation and/or cancer-directed surgery	None/Unknown	Yes	76	400	100	0	Regional	Single (never married)	1625	3010	2486	4645	1445	823	3498	4	Alive	Active follow-up	Alive or dead of other cause	Alive or dead due to cancer
17	White	Male	C41.4-Pelvic bones, sacrum, coccyx and associated joints	Unknown	Positive histology	9260/3: Ewing sarcoma	TX	NX	M1b	None; diagnosed at autopsy	Not recommended	No radiation and/or cancer-directed surgery	Beam radiation	Yes	100	999	999	40	Distant	Single (never married)	1625	3010	2486	4645	1445	823	3498	4	Dead	Active follow-up	Dead (attributable to this cancer dx)	Alive or dead due to cancer
18	White	Female	C41.3-Rib, sternum, clavicle and associated joints	Unknown	Positive histology	9260/3: Ewing sarcoma	T1	N0	M0	None; diagnosed at autopsy	Not recommended	No radiation and/or cancer-directed surgery	Beam radiation	Yes	24	200	0	0	Localized	Single (never married)	1625	3010	2486	4645	1445	823	3498	18	Alive	Active follow-up	Alive or dead of other cause	Alive or dead due to cancer
27	White	Male	C41.0-Bones of skull and face and associated joints	Unknown	Positive histology	9260/3: Ewing sarcoma	TX	N0	M0	None; diagnosed at autopsy	Surgery performed	Radiation after surgery	Beam radiation	Yes	999	999	0	0	Unstaged	Single (never married)	1625	3010	2486	4645	1445	823	3498	101	Alive	Active follow-up	Alive or dead of other cause	Alive or dead due to cancer
1	Unknown	Female	C49.3-Conn, subcutaneous, other soft tis: thorax	Undifferentiated; anaplastic; Grade IV	Positive histology	9260/3: Ewing sarcoma	T1a	N0	M0	None; diagnosed at autopsy	Surgery performed	No radiation and/or cancer-directed surgery	None/Unknown	No/Unknown	20	110	0	0	Localized	Single (never married)	1625	3010	2486	4645	1445	823	3498	0	Alive	Active follow-up	Alive or dead of other cause	Alive or dead due to cancer
46	White	Male	C41.4-Pelvic bones, sacrum, coccyx and associated joints	Undifferentiated; anaplastic; Grade IV	Positive histology	9260/3: Ewing sarcoma	T3	N0	M1b	None; diagnosed at autopsy	Not recommended	No radiation and/or cancer-directed surgery	None/Unknown	Yes	999	820	0	40	Distant	Married (including common law)	1625	3010	2486	4645	1445	823	3498	16	Alive	Active follow-up	Alive or dead of other cause	Alive or dead due to cancer
10	White	Female	C40.3-Short bones of lower limb and associated joints	Poorly differentiated; Grade III	Positive histology	9260/3: Ewing sarcoma	T1	N0	M0	None; diagnosed at autopsy	Surgery performed	No radiation and/or cancer-directed surgery	None/Unknown	Yes	76	400	0	0	Regional	Single (never married)	1625	3010	2486	4645	1445	823	3498	10	Dead	Active follow-up	Dead (attributable to this cancer dx)	Alive or dead due to cancer
14	White	Male	C49.2-Conn, subcutaneous, other soft tis: lower limb, hip	Unknown	Positive histology	9260/3: Ewing sarcoma	T2NOS	N0	M0	None; diagnosed at autopsy	Surgery performed	No radiation and/or cancer-directed surgery	None/Unknown	Yes	75	400	0	0	Regional	Single (never married)	1625	3010	2486	4645	1445	823	3498	8	Alive	Active follow-up	Alive or dead of other cause	Alive or dead due to cancer
50	White	Male	C40.2-Long bones of lower limb and associated joints	Unknown	Positive histology	9260/3: Ewing sarcoma	T2	N0	M0	None; diagnosed at autopsy	Surgery performed	No radiation and/or cancer-directed surgery	None/Unknown	No/Unknown	180	100	0	0	Localized	Single (never married)	1625	3010	2486	4645	1445	823	3498	5	Dead	Active follow-up	Dead (attributable to this cancer dx)	Alive or dead due to cancer
27	White	Female	C49.3-Conn, subcutaneous, other soft tis: thorax	Unknown	Positive histology	9260/3: Ewing sarcoma	T1NOS	N0	M0	None; diagnosed at autopsy	Surgery performed	No radiation and/or cancer-directed surgery	None/Unknown	Yes	40	300	0	0	Localized	Single (never married)	1625	3010	2486	4645	1445	823	3498	9	Alive	Active follow-up	Alive or dead of other cause	Alive or dead due to cancer
15	White	Male	C64.9-Kidney, NOS	Unknown	Positive histology	9260/3: Ewing sarcoma	NA	NA	NA	None; diagnosed at autopsy	Surgery performed	No radiation and/or cancer-directed surgery	None/Unknown	Yes	100	601	0	99	Regional	Single (never married)	1625	3010	2486	4645	1445	823	3498	14	Alive	Active follow-up	Alive or dead of other cause	Alive or dead due to cancer
13	White	Male	C49.6-Conn, subcutaneous, other soft tis: trunk, NOS	Unknown	Positive histology	9260/3: Ewing sarcoma	T2b	N0	M1	None; diagnosed at autopsy	Surgery performed	No radiation and/or cancer-directed surgery	None/Unknown	Yes	57	620	0	40	Distant	Single (never married)	1625	3010	2486	4645	1445	823	3498	7	Alive	Active follow-up	Alive or dead of other cause	Alive or dead due to cancer
20	White	Male	C41.3-Rib, sternum, clavicle and associated joints	Unknown	Positive histology	9260/3: Ewing sarcoma	T2	N0	M1b	None; diagnosed at autopsy	Surgery performed	Radiation after surgery	Beam radiation	Yes	117	300	0	40	Distant	Single (never married)	1625	3010	2486	4645	1445	823	3498	21	Alive	Active follow-up	Alive or dead of other cause	Alive or dead due to cancer
3	White	Female	C40.0-Long bones: upper limb, scapula, and associated joints	Unknown	Positive histology	9260/3: Ewing sarcoma	T1	N0	M0	None; diagnosed at autopsy	Surgery performed	No radiation and/or cancer-directed surgery	None/Unknown	Yes	35	600	0	0	Regional	Single (never married)	1625	3010	2486	4645	1445	823	3498	4	Alive	Active follow-up	Alive or dead of other cause	Alive or dead due to cancer
6	White	Female	C41.4-Pelvic bones, sacrum, coccyx and associated joints	Unknown	Positive histology	9260/3: Ewing sarcoma	TX	N0	M0	None; diagnosed at autopsy	Surgery performed	No radiation and/or cancer-directed surgery	None/Unknown	Yes	999	400	0	0	Regional	Single (never married)	1625	3010	2486	4645	1445	823	3498	10	Alive	Active follow-up	Alive or dead of other cause	Alive or dead due to cancer
15	White	Female	C40.9-Bone of limb, NOS	Unknown	Positive histology	9260/3: Ewing sarcoma	T1	N1	M0	None; diagnosed at autopsy	Surgery performed	Radiation after surgery	Beam radiation	Yes	41	100	100	0	Regional	Single (never married)	1625	3010	2486	4645	1445	823	3498	15	Alive	Active follow-up	Alive or dead of other cause	Alive or dead due to cancer
9	White	Male	C49.5-Conn, subcutaneous, other soft tis: pelvis	Unknown	Positive histology	9260/3: Ewing sarcoma	T2b	N0	M0	None; diagnosed at autopsy	Surgery performed	Radiation after surgery	Beam radiation	Yes	70	320	0	0	Localized	Single (never married)	1625	3010	2486	4645	1445	823	3498	8	Alive	Active follow-up	Alive or dead of other cause	Alive or dead due to cancer
17	White	Male	C49.3-Conn, subcutaneous, other soft tis: thorax	Unknown	Positive histology	9260/3: Ewing sarcoma	TX	N0	M0	None; diagnosed at autopsy	Surgery performed	No radiation and/or cancer-directed surgery	None/Unknown	Yes	999	320	0	0	Localized	Single (never married)	1625	3010	2486	4645	1445	823	3498	12	Alive	Active follow-up	Alive or dead of other cause	Alive or dead due to cancer
12	White	Male	C41.2-Vertebral column	Undifferentiated; anaplastic; Grade IV	Positive histology	9260/3: Ewing sarcoma	T1	N0	M0	None; diagnosed at autopsy	Surgery performed	No radiation and/or cancer-directed surgery	None/Unknown	No/Unknown	9	300	0	0	Localized	Single (never married)	1625	3010	2486	4645	1445	823	3498	8	Dead	Active follow-up	N/A not first tumor	N/A not first tumor
12	Black	Male	C40.0-Long bones: upper limb, scapula, and associated joints	Unknown	Positive histology	9260/3: Ewing sarcoma	T2	N0	M0	None; diagnosed at autopsy	Surgery performed	No radiation and/or cancer-directed surgery	None/Unknown	Yes	121	400	0	0	Regional	Single (never married)	1625	3010	2486	4645	1445	823	3498	7	Alive	Active follow-up	Alive or dead of other cause	Alive or dead due to cancer
47	White	Male	C49.2-Conn, subcutaneous, other soft tis: lower limb, hip	Poorly differentiated; Grade III	Positive histology	9260/3: Ewing sarcoma	T2a	N0	M0	None; diagnosed at autopsy	Surgery performed	No radiation and/or cancer-directed surgery	None/Unknown	Yes	90	110	0	0	Localized	Married (including common law)	1625	3010	2486	4645	1445	823	3498	5	Alive	Active follow-up	Alive or dead of other cause	Alive or dead due to cancer
14	White	Male	C40.2-Long bones of lower limb and associated joints	Undifferentiated; anaplastic; Grade IV	Positive histology	9260/3: Ewing sarcoma	TX	N0	M1a	None; diagnosed at autopsy	Surgery performed	Radiation after surgery	Beam radiation	Yes	999	400	0	30	Distant	Single (never married)	1625	3010	2486	4645	1445	823	3498	6	Alive	Active follow-up	Alive or dead of other cause	Alive or dead due to cancer
17	White	Male	C40.0-Long bones: upper limb, scapula, and associated joints	Moderately differentiated; Grade II	Positive histology	9261/3: Adamantinoma of long bones	T1	N0	M0	None; diagnosed at autopsy	Surgery performed	No radiation and/or cancer-directed surgery	None/Unknown	No/Unknown	66	310	0	0	Localized	Single (never married)	1625	3010	2486	4645	1445	823	3498	4	Alive	Active follow-up	Alive or dead of other cause	Alive or dead due to cancer
19	White	Male	C49.5-Conn, subcutaneous, other soft tis: pelvis	Unknown	Positive histology	9260/3: Ewing sarcoma	T2b	N0	M0	None; diagnosed at autopsy	Not recommended	No radiation and/or cancer-directed surgery	None/Unknown	Yes	124	600	0	0	Regional	Single (never married)	1625	3010	2486	4645	1445	823	3498	7	Alive	Active follow-up	Alive or dead of other cause	Alive or dead due to cancer
65	White	Female	C80.9-Unknown primary site	Undifferentiated; anaplastic; Grade IV	Positive histology	9260/3: Ewing sarcoma	NA	NA	NA	None; diagnosed at autopsy	Not recommended	No radiation and/or cancer-directed surgery	None/Unknown	Yes	999	988	988	98	Unstaged	Married (including common law)	1625	3010	2486	4645	1445	823	3498	1	Alive	Active follow-up	Alive or dead of other cause	Alive or dead due to cancer
78	White	Male	C41.9-Bone, NOS	Unknown	Positive histology	9260/3: Ewing sarcoma	T0	NX	M1b	None; diagnosed at autopsy	Not recommended	No radiation and/or cancer-directed surgery	None/Unknown	No/Unknown	0	950	999	40	Distant	Widowed	1625	3010	2486	4645	1445	823	3498	4	Alive	Active follow-up	Alive or dead of other cause	Alive or dead due to cancer
13	White	Female	C49.0-Conn, subcutaneous, other soft tis: head, face, neck	Unknown	Positive histology	9260/3: Ewing sarcoma	TX	N1	M0	None; diagnosed at autopsy	Not recommended	No radiation and/or cancer-directed surgery	Beam radiation	Yes	999	320	100	0	Regional	Single (never married)	1625	3010	2486	4645	1445	823	3498	4	Alive	Active follow-up	Alive or dead of other cause	Alive or dead due to cancer
10	White	Male	C40.2-Long bones of lower limb and associated joints	Unknown	Positive histology	9260/3: Ewing sarcoma	T1	N0	M1b	None; diagnosed at autopsy	Surgery performed	Radiation after surgery	Beam radiation	Yes	80	400	0	40	Distant	Single (never married)	1625	3010	2486	4645	1445	823	3498	4	Alive	Active follow-up	Alive or dead of other cause	Alive or dead due to cancer
7	Other (American Indian/AK Native, Asian/Pacific Islander)	Male	C41.4-Pelvic bones, sacrum, coccyx and associated joints	Unknown	Positive histology	9260/3: Ewing sarcoma	TX	N0	M0	None; diagnosed at autopsy	Not recommended	No radiation and/or cancer-directed surgery	Beam radiation	Yes	999	400	0	0	Regional	Single (never married)	1625	3010	2486	4645	1445	823	3498	3	Alive	Active follow-up	Alive or dead of other cause	Alive or dead due to cancer
26	Other (American Indian/AK Native, Asian/Pacific Islander)	Female	C41.4-Pelvic bones, sacrum, coccyx and associated joints	Unknown	Positive histology	9260/3: Ewing sarcoma	T2	N0	M0	None; diagnosed at autopsy	Recommended, unknown if performed	No radiation and/or cancer-directed surgery	None/Unknown	Yes	82	400	0	0	Regional	Married (including common law)	1625	3010	2486	4645	1445	823	3498	1	Alive	Active follow-up	Alive or dead of other cause	Alive or dead due to cancer
49	White	Female	C41.9-Bone, NOS	Unknown	Unknown	9260/3: Ewing sarcoma	TX	NX	M0	None; diagnosed at autopsy	Not recommended	No radiation and/or cancer-directed surgery	None/Unknown	No/Unknown	999	999	999	0	Unstaged	Single (never married)	1625	3010	2486	4645	1445	823	3498	1	Dead	Active follow-up	Dead (attributable to this cancer dx)	Alive or dead due to cancer
29	White	Male	C49.2-Conn, subcutaneous, other soft tis: lower limb, hip	Moderately differentiated; Grade II	Positive histology	9260/3: Ewing sarcoma	T1a	N0	M0	None; diagnosed at autopsy	Surgery performed	No radiation and/or cancer-directed surgery	None/Unknown	Yes	25	110	0	0	Localized	Married (including common law)	1625	3010	2486	4645	1445	823	3498	0	Alive	Active follow-up	Alive or dead of other cause	Alive or dead due to cancer
23	White	Female	C41.2-Vertebral column	Unknown	Positive histology	9260/3: Ewing sarcoma	T1	N0	M0	None; diagnosed at autopsy	Not recommended	No radiation and/or cancer-directed surgery	None/Unknown	Yes	42	400	0	0	Regional	Single (never married)	1625	3010	2486	4645	1445	823	3498	0	Alive	Active follow-up	Alive or dead of other cause	Alive or dead due to cancer
50	White	Female	C40.2-Long bones of lower limb and associated joints	Unknown	Positive histology	9261/3: Adamantinoma of long bones	T1	N0	M0	None; diagnosed at autopsy	Surgery performed	No radiation and/or cancer-directed surgery	None/Unknown	No/Unknown	35	600	0	0	Regional	Married (including common law)	1625	3010	2486	4645	1445	823	3498	35	Alive	Active follow-up	Alive or dead of other cause	Alive or dead due to cancer
87	White	Female	C41.9-Bone, NOS	Unknown	Unknown	9260/3: Ewing sarcoma	TX	NX	MX	None; diagnosed at autopsy	Not recommended	No radiation and/or cancer-directed surgery	None/Unknown	No/Unknown	999	999	999	99	Unstaged	Single (never married)	1625	3010	2486	4645	1445	823	3498	0	Dead	Active follow-up	Alive or dead of other cause	Dead (attributable to causes other than this cancer dx)
47	Other (American Indian/AK Native, Asian/Pacific Islander)	Male	C40.2-Long bones of lower limb and associated joints	Poorly differentiated; Grade III	Positive histology	9260/3: Ewing sarcoma	T1	N0	M0	None; diagnosed at autopsy	Surgery performed	No radiation and/or cancer-directed surgery	None/Unknown	Yes	55	400	0	0	Regional	Married (including common law)	413	1167	2471	5904	669	903	3575	47	Dead	Active follow-up	Dead (attributable to this cancer dx)	Alive or dead due to cancer
14	Other (American Indian/AK Native, Asian/Pacific Islander)	Male	C41.2-Vertebral column	Undifferentiated; anaplastic; Grade IV	Positive histology	9260/3: Ewing sarcoma	T1	N0	M0	None; diagnosed at autopsy	Surgery performed	No radiation and/or cancer-directed surgery	None/Unknown	No/Unknown	37	600	0	0	Regional	Single (never married)	413	1167	2471	5904	669	903	3575	25	Dead	Active follow-up	Dead (attributable to this cancer dx)	Alive or dead due to cancer
29	Other (American Indian/AK Native, Asian/Pacific Islander)	Female	C49.2-Conn, subcutaneous, other soft tis: lower limb, hip	Poorly differentiated; Grade III	Positive histology	9260/3: Ewing sarcoma	T2b	N0	M1	None; diagnosed at autopsy	Surgery performed	No radiation and/or cancer-directed surgery	None/Unknown	Yes	170	120	0	40	Distant	Divorced	413	1167	2471	5904	669	903	3575	7	Dead	Active follow-up	Dead (attributable to this cancer dx)	Alive or dead due to cancer
31	Other (American Indian/AK Native, Asian/Pacific Islander)	Male	C49.5-Conn, subcutaneous, other soft tis: pelvis	Undifferentiated; anaplastic; Grade IV	Positive histology	9260/3: Ewing sarcoma	T2b	N0	M0	None; diagnosed at autopsy	Surgery performed	No radiation and/or cancer-directed surgery	None/Unknown	Yes	90	800	0	0	Distant	Single (never married)	413	1167	2471	5904	669	903	3575	9	Dead	Active follow-up	Dead (attributable to this cancer dx)	Alive or dead due to cancer
6	Other (American Indian/AK Native, Asian/Pacific Islander)	Male	C41.2-Vertebral column	Unknown	Positive histology	9260/3: Ewing sarcoma	T2	N0	M0	None; diagnosed at autopsy	Surgery performed	Radiation after surgery	Beam radiation	No/Unknown	94	800	0	0	Distant	Single (never married)	413	1167	2471	5904	669	903	3575	24	Dead	Active follow-up	Dead (attributable to this cancer dx)	Alive or dead due to cancer
21	Other (American Indian/AK Native, Asian/Pacific Islander)	Male	C40.2-Long bones of lower limb and associated joints	Unknown	Positive histology	9260/3: Ewing sarcoma	T2	N1	M0	None; diagnosed at autopsy	Surgery performed	No radiation and/or cancer-directed surgery	None/Unknown	Yes	113	350	100	0	Regional	Single (never married)	413	1167	2471	5904	669	903	3575	34	Alive	Active follow-up	Alive or dead of other cause	Alive or dead due to cancer
2	Other (American Indian/AK Native, Asian/Pacific Islander)	Male	C40.2-Long bones of lower limb and associated joints	Poorly differentiated; Grade III	Positive histology	9260/3: Ewing sarcoma	T1	N0	M0	None; diagnosed at autopsy	Surgery performed	No radiation and/or cancer-directed surgery	None/Unknown	Yes	40	300	0	0	Localized	Single (never married)	413	1167	2471	5904	669	903	3575	14	Alive	Active follow-up	Alive or dead of other cause	Alive or dead due to cancer
21	Other (American Indian/AK Native, Asian/Pacific Islander)	Male	C41.2-Vertebral column	Unknown	Positive histology	9260/3: Ewing sarcoma	TX	NX	M0	None; diagnosed at autopsy	Surgery performed	Radiation after surgery	Beam radiation	Yes	999	100	999	0	Localized	Single (never married)	413	1167	2471	5904	669	903	3575	12	Alive	Active follow-up	Alive or dead of other cause	Alive or dead due to cancer
20	Other (American Indian/AK Native, Asian/Pacific Islander)	Male	C40.2-Long bones of lower limb and associated joints	Moderately differentiated; Grade II	Positive histology	9260/3: Ewing sarcoma	T1	N0	M0	None; diagnosed at autopsy	Surgery performed	Radiation before and after surgery	Beam radiation	Yes	994	310	0	0	Localized	Single (never married)	413	1167	2471	5904	669	903	3575	8	Alive	Active follow-up	Alive or dead of other cause	Alive or dead due to cancer
31	White	Male	C41.1-Mandible	Unknown	Positive histology	9260/3: Ewing sarcoma	T1	N0	M0	None; diagnosed at autopsy	Surgery performed	No radiation and/or cancer-directed surgery	None/Unknown	Yes	60	600	0	0	Regional	Single (never married)	794	2455	1440	4326	1047	384	2363	3	Alive	Active follow-up	Alive or dead of other cause	Alive or dead due to cancer
42	White	Male	C49.3-Conn, subcutaneous, other soft tis: thorax	Undifferentiated; anaplastic; Grade IV	Positive histology	9260/3: Ewing sarcoma	T2b	N0	M0	None; diagnosed at autopsy	Surgery performed	Radiation prior to surgery	Beam radiation	Yes	62	620	0	0	Regional	Single (never married)	1058	2505	1663	4841	1068	753	2960	68	Alive	Active follow-up	N/A not first tumor	N/A not first tumor
76	White	Male	C72.0-Spinal cord	Unknown	Positive histology	9260/3: Ewing sarcoma	NA	NA	NA	None; diagnosed at autopsy	Surgery performed	Radiation after surgery	Beam radiation	No/Unknown	14	300	988	0	Unstaged	Married (including common law)	280	1093	2653	6025	496	539	3929	106	Alive	Active follow-up	N/A not first tumor	N/A not first tumor
47	White	Female	C40.2-Long bones of lower limb and associated joints	Undifferentiated; anaplastic; Grade IV	Positive histology	9260/3: Ewing sarcoma	T2	N1	M0	None; diagnosed at autopsy	Surgery performed	No radiation and/or cancer-directed surgery	None/Unknown	Yes	200	400	100	0	Regional	Married (including common law)	1040	1990	2695	6529	635	520	3798	90	Alive	Active follow-up	N/A not first tumor	N/A not first tumor
24	White	Male	C41.2-Vertebral column	Unknown	Positive histology	9260/3: Ewing sarcoma	T1	N0	M0	None; diagnosed at autopsy	Surgery performed	No radiation and/or cancer-directed surgery	Recommended, unknown if administered	No/Unknown	35	200	0	0	Localized	Single (never married)	1040	2579	1592	4657	1257	831	2994	52	Alive	Active follow-up	N/A not first tumor	N/A not first tumor
46	White	Female	C41.4-Pelvic bones, sacrum, coccyx and associated joints	Unknown	Positive histology	9260/3: Ewing sarcoma	T1	N0	M0	None; diagnosed at autopsy	Surgery performed	Radiation prior to surgery	Beam radiation	Yes	28	400	0	0	Regional	Married (including common law)	1055	2054	3081	6461	696	504	3893	13	Alive	Active follow-up	N/A not first tumor	N/A not first tumor
20	White	Male	C41.0-Bones of skull and face and associated joints	Unknown	Positive histology	9260/3: Ewing sarcoma	T1	N0	M0	None; diagnosed at autopsy	Surgery performed	Radiation after surgery	Beam radiation	Yes	63	400	0	0	Regional	Single (never married)	669	1673	2481	5072	1027	666	3751	12	Dead	Active follow-up	N/A not first tumor	N/A not first tumor
64	White	Female	C41.0-Bones of skull and face and associated joints	Poorly differentiated; Grade III	Positive histology	9260/3: Ewing sarcoma	T1	N0	M0	None; diagnosed at autopsy	Not recommended	No radiation and/or cancer-directed surgery	Beam radiation	Yes	60	100	0	0	Localized	Married (including common law)	794	1742	2952	5344	885	593	3883	42	Alive	Active follow-up	N/A not first tumor	N/A not first tumor
55	White	Male	C41.4-Pelvic bones, sacrum, coccyx and associated joints	Unknown	Positive histology	9260/3: Ewing sarcoma	T1	N0	M0	None; diagnosed at autopsy	Not recommended	No radiation and/or cancer-directed surgery	None/Unknown	Yes	39	400	0	0	Regional	Married (including common law)	1055	2054	3081	6461	696	504	3893	28	Alive	Active follow-up	N/A not first tumor	N/A not first tumor
84	White	Female	C49.3-Conn, subcutaneous, other soft tis: thorax	Unknown	Positive histology	9260/3: Ewing sarcoma	T1b	N0	M0	None; diagnosed at autopsy	Surgery performed	No radiation and/or cancer-directed surgery	None/Unknown	No/Unknown	17	120	0	0	Localized	Widowed	1055	2054	3081	6461	696	504	3893	16	Alive	Active follow-up	N/A not first tumor	N/A not first tumor
4	Other (American Indian/AK Native, Asian/Pacific Islander)	Female	C40.0-Long bones: upper limb, scapula, and associated joints	Unknown	Positive histology	9260/3: Ewing sarcoma	T1	N0	M0	None; diagnosed at autopsy	Not recommended	No radiation and/or cancer-directed surgery	Beam radiation	Yes	44	100	0	0	Localized	Single (never married)	794	1742	2952	5344	885	593	3883	81	Alive	Active follow-up	N/A not first tumor	N/A not first tumor
21	White	Male	C49.3-Conn, subcutaneous, other soft tis: thorax	Unknown	Positive histology	9260/3: Ewing sarcoma	T2b	N1	M0	None; diagnosed at autopsy	Not recommended	No radiation and/or cancer-directed surgery	Beam radiation	Yes	76	600	100	0	Regional	Unknown	794	1742	2952	5344	885	593	3883	23	Alive	Active follow-up	N/A not first tumor	N/A not first tumor
26	White	Male	C49.3-Conn, subcutaneous, other soft tis: thorax	Undifferentiated; anaplastic; Grade IV	Positive histology	9260/3: Ewing sarcoma	T1b	N0	M0	None; diagnosed at autopsy	Surgery performed	Radiation after surgery	Beam radiation	Yes	50	420	0	0	Regional	Married (including common law)	1055	2054	3081	6461	696	504	3893	46	Dead	Active follow-up	Dead (attributable to this cancer dx)	Alive or dead due to cancer
1	White	Male	C40.2-Long bones of lower limb and associated joints	Unknown	Positive histology	9260/3: Ewing sarcoma	T1	NX	M0	None; diagnosed at autopsy	Surgery performed	No radiation and/or cancer-directed surgery	None/Unknown	Yes	70	400	999	0	Regional	Single (never married)	418	1674	1660	4049	1135	874	3190	98	Alive	Active follow-up	Alive or dead of other cause	Alive or dead due to cancer
12	White	Male	C41.4-Pelvic bones, sacrum, coccyx and associated joints	Unknown	Positive histology	9260/3: Ewing sarcoma	T1	N0	M0	None; diagnosed at autopsy	Not recommended	No radiation and/or cancer-directed surgery	Beam radiation	Yes	66	400	0	0	Regional	Single (never married)	1833	3248	1755	3846	1760	1181	3082	119	Alive	Active follow-up	Alive or dead of other cause	Alive or dead due to cancer
14	White	Female	C41.3-Rib, sternum, clavicle and associated joints	Poorly differentiated; Grade III	Positive histology	9260/3: Ewing sarcoma	T1	N0	M1b	None; diagnosed at autopsy	Surgery performed	Radiation after surgery	Beam radiation	Yes	45	400	0	40	Distant	Single (never married)	670	1508	2854	6192	470	427	3627	30	Dead	Active follow-up	Dead (attributable to this cancer dx)	Alive or dead due to cancer
22	White	Male	C41.3-Rib, sternum, clavicle and associated joints	Unknown	Positive histology	9260/3: Ewing sarcoma	T1	N0	M0	None; diagnosed at autopsy	Surgery performed	No radiation and/or cancer-directed surgery	None/Unknown	Yes	75	400	0	0	Regional	Single (never married)	2158	3619	1105	3801	1692	1309	2683	22	Dead	Active follow-up	Dead (attributable to this cancer dx)	Alive or dead due to cancer
13	White	Male	C41.2-Vertebral column	Well differentiated; Grade I	Positive histology	9260/3: Ewing sarcoma	TX	N0	M0	None; diagnosed at autopsy	Surgery performed	Radiation after surgery	Beam radiation	Yes	999	400	0	0	Regional	Single (never married)	794	1742	2952	5344	885	593	3883	41	Dead	Active follow-up	Dead (attributable to this cancer dx)	Alive or dead due to cancer
15	White	Male	C41.4-Pelvic bones, sacrum, coccyx and associated joints	Unknown	Positive histology	9260/3: Ewing sarcoma	TX	N0	M0	None; diagnosed at autopsy	Not recommended	No radiation and/or cancer-directed surgery	Beam radiation	Yes	999	100	0	0	Localized	Single (never married)	1055	2054	3081	6461	696	504	3893	102	Alive	Active follow-up	Alive or dead of other cause	Alive or dead due to cancer
24	White	Female	C40.2-Long bones of lower limb and associated joints	Unknown	Positive histology	9260/3: Ewing sarcoma	T1	N0	M0	None; diagnosed at autopsy	Surgery performed	No radiation and/or cancer-directed surgery	None/Unknown	Yes	61	400	0	0	Regional	Single (never married)	1331	2877	1453	4692	1351	1035	2855	114	Alive	Active follow-up	Alive or dead of other cause	Alive or dead due to cancer
39	White	Female	C41.2-Vertebral column	Unknown	Positive histology	9260/3: Ewing sarcoma	TX	N0	M0	None; diagnosed at autopsy	Surgery performed	Radiation after surgery	Beam radiation	No/Unknown	999	400	0	0	Regional	Married (including common law)	794	1742	2952	5344	885	593	3883	7	Dead	Active follow-up	Alive or dead of other cause	Dead (attributable to causes other than this cancer dx)
1	White	Male	C40.0-Long bones: upper limb, scapula, and associated joints	Undifferentiated; anaplastic; Grade IV	Positive histology	9260/3: Ewing sarcoma	T1	N0	M0	None; diagnosed at autopsy	Not recommended	No radiation and/or cancer-directed surgery	None/Unknown	Yes	34	100	0	0	Localized	Single (never married)	794	1742	2952	5344	885	593	3883	2	Alive	Active follow-up	Alive or dead of other cause	Alive or dead due to cancer
16	Other (American Indian/AK Native, Asian/Pacific Islander)	Male	C41.9-Bone, NOS	Unknown	Positive histology	9260/3: Ewing sarcoma	TX	NX	M1b	Non-primary surgical procedure to distant site	Not recommended	No radiation and/or cancer-directed surgery	None/Unknown	Yes	999	999	999	40	Distant	Single (never married)	1331	2877	1453	4692	1351	1035	2855	8	Dead	Active follow-up	Dead (attributable to this cancer dx)	Alive or dead due to cancer
38	White	Female	C49.2-Conn, subcutaneous, other soft tis: lower limb, hip	Undifferentiated; anaplastic; Grade IV	Positive histology	9260/3: Ewing sarcoma	T2NOS	N0	M0	None; diagnosed at autopsy	Surgery performed	Radiation after surgery	Beam radiation	Yes	100	400	0	0	Regional	Married (including common law)	669	1673	2481	5072	1027	666	3751	18	Dead	Active follow-up	Dead (attributable to this cancer dx)	Alive or dead due to cancer
8	White	Female	C40.3-Short bones of lower limb and associated joints	Unknown	Positive histology	9260/3: Ewing sarcoma	TX	N0	M1a	Non-primary surgical procedure to distant site	Surgery performed	No radiation and/or cancer-directed surgery	None/Unknown	Yes	999	300	0	30	Distant	Single (never married)	669	1673	2481	5072	1027	666	3751	118	Alive	Active follow-up	Alive or dead of other cause	Alive or dead due to cancer
18	Other (American Indian/AK Native, Asian/Pacific Islander)	Male	C40.2-Long bones of lower limb and associated joints	Unknown	Positive histology	9260/3: Ewing sarcoma	TX	N0	M0	None; diagnosed at autopsy	Not recommended	No radiation and/or cancer-directed surgery	None/Unknown	Yes	999	100	0	0	Localized	Single (never married)	1055	2054	3081	6461	696	504	3893	27	Dead	Active follow-up	Dead (attributable to this cancer dx)	Alive or dead due to cancer
15	White	Female	C47.5-Periph nerves & autonomic nerv sys: pelvis	Unknown	Positive histology	9260/3: Ewing sarcoma	T2b	N0	M1	None; diagnosed at autopsy	Surgery performed	No radiation and/or cancer-directed surgery	None/Unknown	Yes	150	800	0	40	Distant	Single (never married)	1058	2505	1663	4841	1068	753	2960	9	Dead	Active follow-up	Dead (attributable to this cancer dx)	Alive or dead due to cancer
14	White	Male	C49.2-Conn, subcutaneous, other soft tis: lower limb, hip	Unknown	Positive histology	9260/3: Ewing sarcoma	T1b	N0	M0	None; diagnosed at autopsy	Surgery performed	No radiation and/or cancer-directed surgery	None/Unknown	Yes	39	620	0	0	Regional	Single (never married)	794	1742	2952	5344	885	593	3883	41	Dead	Active follow-up	Dead (attributable to this cancer dx)	Alive or dead due to cancer
18	White	Female	C38.4-Pleura, NOS	Unknown	Positive histology	9260/3: Ewing sarcoma	NA	NA	NA	None; diagnosed at autopsy	Surgery performed	No radiation and/or cancer-directed surgery	None/Unknown	Yes	100	160	0	0	Unstaged	Single (never married)	1055	2054	3081	6461	696	504	3893	113	Alive	Active follow-up	Alive or dead of other cause	Alive or dead due to cancer
73	White	Female	C41.3-Rib, sternum, clavicle and associated joints	Unknown	Positive histology	9260/3: Ewing sarcoma	T2	N0	M0	None; diagnosed at autopsy	Surgery performed	Radiation after surgery	Beam radiation	Yes	100	400	0	0	Regional	Married (including common law)	1058	2505	1663	4841	1068	753	2960	29	Dead	Active follow-up	Dead (attributable to this cancer dx)	Alive or dead due to cancer
20	White	Male	C40.0-Long bones: upper limb, scapula, and associated joints	Unknown	Positive histology	9260/3: Ewing sarcoma	T2	NX	M1a	None; diagnosed at autopsy	Not recommended	No radiation and/or cancer-directed surgery	None/Unknown	Yes	90	300	999	30	Distant	Single (never married)	673	1917	2022	4217	1089	725	3075	112	Alive	Active follow-up	Alive or dead of other cause	Alive or dead due to cancer
32	White	Female	C49.2-Conn, subcutaneous, other soft tis: lower limb, hip	Unknown	Positive histology	9260/3: Ewing sarcoma	TX	N0	M0	None; diagnosed at autopsy	Surgery performed	No radiation and/or cancer-directed surgery	None/Unknown	Yes	999	310	0	0	Localized	Married (including common law)	794	1742	2952	5344	885	593	3883	114	Alive	Active follow-up	Alive or dead of other cause	Alive or dead due to cancer
12	White	Female	C41.3-Rib, sternum, clavicle and associated joints	Unknown	Positive histology	9260/3: Ewing sarcoma	TX	N0	M1b	Non-primary surgical procedure to other regional sites	Surgery performed	Radiation after surgery	Beam radiation	Yes	999	400	0	40	Distant	Single (never married)	1366	2964	1405	4470	1229	1165	2770	61	Dead	Active follow-up	Dead (attributable to this cancer dx)	Alive or dead due to cancer
8	White	Female	C49.2-Conn, subcutaneous, other soft tis: lower limb, hip	Well differentiated; Grade I	Positive histology	9260/3: Ewing sarcoma	TX	N0	M0	None; diagnosed at autopsy	Surgery performed	No radiation and/or cancer-directed surgery	None/Unknown	Yes	999	300	0	0	Localized	Single (never married)	1058	2505	1663	4841	1068	753	2960	109	Alive	Active follow-up	Alive or dead of other cause	Alive or dead due to cancer
12	White	Female	C40.2-Long bones of lower limb and associated joints	Unknown	Positive histology	9260/3: Ewing sarcoma	TX	N0	M0	None; diagnosed at autopsy	Surgery performed	No radiation and/or cancer-directed surgery	None/Unknown	Yes	999	400	0	0	Regional	Single (never married)	280	1093	2653	6025	496	539	3929	111	Alive	Active follow-up	Alive or dead of other cause	Alive or dead due to cancer
26	White	Male	C40.2-Long bones of lower limb and associated joints	Unknown	Positive histology	9261/3: Adamantinoma of long bones	T1	N0	M0	None; diagnosed at autopsy	Surgery performed	No radiation and/or cancer-directed surgery	None/Unknown	No/Unknown	80	100	0	0	Localized	Single (never married)	794	1742	2952	5344	885	593	3883	108	Alive	Active follow-up	Alive or dead of other cause	Alive or dead due to cancer
19	Other (American Indian/AK Native, Asian/Pacific Islander)	Female	C41.4-Pelvic bones, sacrum, coccyx and associated joints	Unknown	Positive histology	9260/3: Ewing sarcoma	T3	N1	M1b	Non-primary surgical procedure to distant site	Not recommended	Radiation after surgery	Beam radiation	Yes	230	820	100	50	Distant	Single (never married)	1055	2054	3081	6461	696	504	3893	15	Dead	Active follow-up	Dead (attributable to this cancer dx)	Alive or dead due to cancer
46	White	Female	C80.9-Unknown primary site	Unknown	Positive histology	9260/3: Ewing sarcoma	NA	NA	NA	None; diagnosed at autopsy	Not recommended	No radiation and/or cancer-directed surgery	None/Unknown	No/Unknown	999	988	988	98	Unstaged	Single (never married)	794	1742	2952	5344	885	593	3883	0	Dead	Active follow-up	Dead (attributable to this cancer dx)	Alive or dead due to cancer
18	White	Male	C49.1-Conn, subcutaneous, other soft tis: upr limb, shoulder	Unknown	Positive histology	9260/3: Ewing sarcoma	T2b	N0	M0	None; diagnosed at autopsy	Surgery performed	No radiation and/or cancer-directed surgery	None/Unknown	Yes	145	620	0	0	Regional	Single (never married)	1040	2579	1592	4657	1257	831	2994	24	Dead	Active follow-up	Dead (attributable to this cancer dx)	Alive or dead due to cancer
18	White	Male	C49.4-Conn, subcutaneous, other soft tis: abdomen	Unknown	Positive histology	9260/3: Ewing sarcoma	T2b	N0	M1	None; diagnosed at autopsy	Surgery performed	Radiation after surgery	Beam radiation	Yes	150	620	0	40	Distant	Single (never married)	794	1742	2952	5344	885	593	3883	16	Dead	Active follow-up	Dead (attributable to this cancer dx)	Alive or dead due to cancer
15	White	Female	C41.4-Pelvic bones, sacrum, coccyx and associated joints	Unknown	Positive histology	9260/3: Ewing sarcoma	TX	N0	M0	None; diagnosed at autopsy	Surgery performed	Radiation after surgery	Beam radiation	Yes	999	600	0	0	Regional	Single (never married)	1833	3248	1755	3846	1760	1181	3082	111	Alive	Active follow-up	N/A not first tumor	N/A not first tumor
22	White	Male	C40.2-Long bones of lower limb and associated joints	Unknown	Positive histology	9260/3: Ewing sarcoma	T2	N0	M0	None; diagnosed at autopsy	Surgery performed	No radiation and/or cancer-directed surgery	None/Unknown	Yes	150	400	0	0	Regional	Separated	312	955	3028	6586	394	402	4118	109	Alive	Active follow-up	Alive or dead of other cause	Alive or dead due to cancer
16	White	Male	C49.5-Conn, subcutaneous, other soft tis: pelvis	Unknown	Positive histology	9260/3: Ewing sarcoma	TX	NX	M0	None; diagnosed at autopsy	Not recommended	No radiation and/or cancer-directed surgery	None/Unknown	Yes	10	999	999	0	Unstaged	Single (never married)	794	1742	2952	5344	885	593	3883	11	Alive	Active follow-up	N/A not first tumor	N/A not first tumor
14	White	Male	C40.2-Long bones of lower limb and associated joints	Unknown	Positive histology	9260/3: Ewing sarcoma	T1	N0	M0	None; diagnosed at autopsy	Surgery performed	No radiation and/or cancer-directed surgery	None/Unknown	Yes	63	400	0	0	Regional	Single (never married)	291	1197	1751	4612	898	949	3271	108	Alive	Active follow-up	Alive or dead of other cause	Alive or dead due to cancer
19	White	Male	C40.2-Long bones of lower limb and associated joints	Unknown	Positive histology	9260/3: Ewing sarcoma	T3	N0	M1b	None; diagnosed at autopsy	Not recommended	No radiation and/or cancer-directed surgery	None/Unknown	Yes	999	820	0	40	Distant	Single (never married)	1058	2505	1663	4841	1068	753	2960	16	Dead	Active follow-up	Dead (attributable to this cancer dx)	Alive or dead due to cancer
37	White	Male	C41.4-Pelvic bones, sacrum, coccyx and associated joints	Unknown	Positive histology	9260/3: Ewing sarcoma	T3	N0	M1b	None; diagnosed at autopsy	Not recommended	No radiation and/or cancer-directed surgery	None/Unknown	Yes	999	820	0	40	Distant	Single (never married)	1058	2505	1663	4841	1068	753	2960	10	Alive	Active follow-up	Alive or dead of other cause	Alive or dead due to cancer
18	White	Male	C40.2-Long bones of lower limb and associated joints	Unknown	Positive histology	9260/3: Ewing sarcoma	TX	N0	M1b	None; diagnosed at autopsy	Not recommended	No radiation and/or cancer-directed surgery	None/Unknown	Yes	999	100	0	40	Distant	Single (never married)	621	1624	2139	6060	607	612	3308	103	Alive	Active follow-up	Alive or dead of other cause	Alive or dead due to cancer
18	White	Male	C41.4-Pelvic bones, sacrum, coccyx and associated joints	Unknown	Positive histology	9260/3: Ewing sarcoma	T2	N0	M0	None; diagnosed at autopsy	Surgery performed	Radiation prior to surgery	Beam radiation	Yes	83	300	0	0	Localized	Single (never married)	1055	2054	3081	6461	696	504	3893	22	Dead	Active follow-up	Dead (attributable to this cancer dx)	Alive or dead due to cancer
6	White	Male	C40.0-Long bones: upper limb, scapula, and associated joints	Unknown	Positive histology	9260/3: Ewing sarcoma	TX	N1	M0	None; diagnosed at autopsy	Surgery performed	Radiation after surgery	Beam radiation	Yes	999	300	100	0	Regional	Single (never married)	1040	1990	2695	6529	635	520	3798	105	Alive	Active follow-up	Alive or dead of other cause	Alive or dead due to cancer
60	White	Female	C49.1-Conn, subcutaneous, other soft tis: upr limb, shoulder	Unknown	Positive histology	9260/3: Ewing sarcoma	TX	NX	MX	None; diagnosed at autopsy	Surgery performed	No radiation and/or cancer-directed surgery	None/Unknown	Yes	999	999	999	99	Unstaged	Single (never married)	1058	2505	1663	4841	1068	753	2960	6	Dead	Active follow-up	Dead (attributable to this cancer dx)	Alive or dead due to cancer
30	White	Female	C41.4-Pelvic bones, sacrum, coccyx and associated joints	Unknown	Positive histology	9260/3: Ewing sarcoma	T3	N0	M1b	Non-primary surgical procedure performed	Not recommended	No radiation and/or cancer-directed surgery	None/Unknown	Yes	999	820	0	40	Distant	Married (including common law)	666	2836	1099	3606	1639	1067	3424	6	Dead	Active follow-up	Dead (attributable to this cancer dx)	Alive or dead due to cancer
15	Other (American Indian/AK Native, Asian/Pacific Islander)	Male	C40.2-Long bones of lower limb and associated joints	Unknown	Positive histology	9260/3: Ewing sarcoma	T2	N0	M0	None; diagnosed at autopsy	Surgery performed	No radiation and/or cancer-directed surgery	None/Unknown	Yes	90	400	0	0	Regional	Single (never married)	1331	2877	1453	4692	1351	1035	2855	100	Alive	Active follow-up	Alive or dead of other cause	Alive or dead due to cancer
8	White	Male	C41.4-Pelvic bones, sacrum, coccyx and associated joints	Unknown	Positive histology	9260/3: Ewing sarcoma	T1	N0	M1a	None; diagnosed at autopsy	Not recommended	No radiation and/or cancer-directed surgery	Beam radiation	Yes	70	600	0	30	Distant	Single (never married)	1058	2505	1663	4841	1068	753	2960	20	Dead	Active follow-up	Dead (attributable to this cancer dx)	Alive or dead due to cancer
11	White	Male	C40.0-Long bones: upper limb, scapula, and associated joints	Unknown	Positive histology	9260/3: Ewing sarcoma	T1	N1	M0	None; diagnosed at autopsy	Not recommended	No radiation and/or cancer-directed surgery	None/Unknown	Yes	70	400	100	0	Regional	Single (never married)	669	1673	2481	5072	1027	666	3751	102	Alive	Active follow-up	Alive or dead of other cause	Alive or dead due to cancer
18	White	Female	C41.2-Vertebral column	Unknown	Positive histology	9260/3: Ewing sarcoma	T3	NX	M1b	None; diagnosed at autopsy	Surgery performed	Radiation after surgery	Beam radiation	Yes	999	820	999	40	Distant	Single (never married)	1040	2579	1592	4657	1257	831	2994	28	Dead	Active follow-up	Dead (attributable to this cancer dx)	Alive or dead due to cancer
7	White	Female	C41.0-Bones of skull and face and associated joints	Unknown	Positive histology	9260/3: Ewing sarcoma	T1	N0	M0	None; diagnosed at autopsy	Surgery performed	No radiation and/or cancer-directed surgery	None/Unknown	Yes	23	600	0	0	Regional	Single (never married)	1058	2505	1663	4841	1068	753	2960	105	Alive	Active follow-up	Alive or dead of other cause	Alive or dead due to cancer
35	Other (American Indian/AK Native, Asian/Pacific Islander)	Female	C40.3-Short bones of lower limb and associated joints	Unknown	Positive histology	9260/3: Ewing sarcoma	T1	N0	M0	None; diagnosed at autopsy	Surgery performed	Radiation after surgery	Beam radiation	Yes	50	300	0	0	Localized	Married (including common law)	1055	2054	3081	6461	696	504	3893	86	Dead	Active follow-up	Dead (attributable to this cancer dx)	Alive or dead due to cancer
36	White	Female	C56.9-Ovary	Unknown	Positive histology	9260/3: Ewing sarcoma	NA	NA	NA	None; diagnosed at autopsy	Surgery performed	No radiation and/or cancer-directed surgery	None/Unknown	Yes	110	300	0	0	Localized	Married (including common law)	794	1742	2952	5344	885	593	3883	41	Dead	Active follow-up	Dead (attributable to this cancer dx)	Alive or dead due to cancer
54	White	Female	C49.6-Conn, subcutaneous, other soft tis: trunk, NOS	Unknown	Positive histology	9260/3: Ewing sarcoma	T1b	N0	M1	None; diagnosed at autopsy	Not recommended	No radiation and/or cancer-directed surgery	Beam radiation	Yes	33	320	0	40	Distant	Divorced	2302	3832	1150	3630	1881	1275	2724	18	Dead	Active follow-up	Dead (attributable to this cancer dx)	Alive or dead due to cancer
9	White	Female	C41.4-Pelvic bones, sacrum, coccyx and associated joints	Undifferentiated; anaplastic; Grade IV	Positive histology	9260/3: Ewing sarcoma	T3	NX	M1a	None; diagnosed at autopsy	Recommended but not performed, unknown reason	No radiation and/or cancer-directed surgery	Beam radiation	Yes	999	820	999	30	Distant	Single (never married)	621	1624	2139	6060	607	612	3308	11	Dead	Active follow-up	Dead (attributable to this cancer dx)	Alive or dead due to cancer
5	White	Male	C40.0-Long bones: upper limb, scapula, and associated joints	Unknown	Positive histology	9260/3: Ewing sarcoma	TX	N0	M1b	None; diagnosed at autopsy	Surgery performed	No radiation and/or cancer-directed surgery	None/Unknown	Yes	999	300	0	40	Distant	Single (never married)	1055	2054	3081	6461	696	504	3893	70	Alive	Active follow-up	Alive or dead of other cause	Alive or dead due to cancer
13	White	Male	C41.3-Rib, sternum, clavicle and associated joints	Unknown	Positive histology	9260/3: Ewing sarcoma	TX	N0	M0	None; diagnosed at autopsy	Not recommended	No radiation and/or cancer-directed surgery	None/Unknown	Yes	999	300	0	0	Localized	Single (never married)	312	955	3028	6586	394	402	4118	33	Dead	Active follow-up	Dead (attributable to this cancer dx)	Alive or dead due to cancer
48	Black	Male	C49.5-Conn, subcutaneous, other soft tis: pelvis	Unknown	Positive histology	9260/3: Ewing sarcoma	T2b	N1	M0	None; diagnosed at autopsy	Surgery performed	Radiation after surgery	Beam radiation	Yes	281	620	100	0	Regional	Single (never married)	794	1742	2952	5344	885	593	3883	16	Dead	Active follow-up	Dead (attributable to this cancer dx)	Alive or dead due to cancer
31	White	Male	C40.2-Long bones of lower limb and associated joints	Unknown	Positive histology	9260/3: Ewing sarcoma	T2	N0	M0	Non-primary surgical procedure to distant site	Surgery performed	Sequence unknown, but both were given	Beam radiation	Yes	89	100	0	0	Localized	Married (including common law)	1040	2579	1592	4657	1257	831	2994	58	Dead	Active follow-up	Dead (attributable to this cancer dx)	Alive or dead due to cancer
38	White	Male	C49.2-Conn, subcutaneous, other soft tis: lower limb, hip	Undifferentiated; anaplastic; Grade IV	Positive histology	9260/3: Ewing sarcoma	T1b	N0	M0	None; diagnosed at autopsy	Surgery performed	No radiation and/or cancer-directed surgery	None/Unknown	Yes	40	120	0	0	Localized	Married (including common law)	1504	3153	1352	3940	1678	1200	2967	97	Alive	Active follow-up	Alive or dead of other cause	Alive or dead due to cancer
2	White	Female	C49.2-Conn, subcutaneous, other soft tis: lower limb, hip	Unknown	Positive histology	9260/3: Ewing sarcoma	T1NOS	N0	M0	None; diagnosed at autopsy	Surgery performed	No radiation and/or cancer-directed surgery	None/Unknown	Yes	20	100	0	0	Localized	Single (never married)	794	1742	2952	5344	885	593	3883	97	Alive	Active follow-up	Alive or dead of other cause	Alive or dead due to cancer
17	Other (American Indian/AK Native, Asian/Pacific Islander)	Male	C49.5-Conn, subcutaneous, other soft tis: pelvis	Unknown	Positive histology	9260/3: Ewing sarcoma	T2b	N0	M0	None; diagnosed at autopsy	Surgery performed	Radiation after surgery	Beam radiation	Yes	68	620	0	0	Regional	Single (never married)	2158	3619	1105	3801	1692	1309	2683	96	Alive	Active follow-up	Alive or dead of other cause	Alive or dead due to cancer
30	White	Male	C40.2-Long bones of lower limb and associated joints	Undifferentiated; anaplastic; Grade IV	Positive histology	9260/3: Ewing sarcoma	T2	N1	M1a	None; diagnosed at autopsy	Surgery performed	No radiation and/or cancer-directed surgery	None/Unknown	Yes	311	200	100	30	Distant	Single (never married)	418	1674	1660	4049	1135	874	3190	5	Dead	Active follow-up	Dead (attributable to this cancer dx)	Alive or dead due to cancer
3	White	Male	C41.3-Rib, sternum, clavicle and associated joints	Unknown	Positive histology	9260/3: Ewing sarcoma	TX	NX	M0	None; diagnosed at autopsy	Surgery performed	Radiation after surgery	Beam radiation	Yes	999	999	999	0	Unstaged	Single (never married)	1504	3153	1352	3940	1678	1200	2967	79	Alive	Active follow-up	Alive or dead of other cause	Alive or dead due to cancer
13	White	Male	C41.3-Rib, sternum, clavicle and associated joints	Unknown	Positive histology	9260/3: Ewing sarcoma	T2	N0	M1b	Non-primary surgical procedure to distant site	Surgery performed	Radiation after surgery	Beam radiation	Yes	190	800	0	40	Distant	Single (never married)	963	1960	2639	6141	563	429	3563	12	Dead	Active follow-up	Dead (attributable to this cancer dx)	Alive or dead due to cancer
19	White	Male	C40.0-Long bones: upper limb, scapula, and associated joints	Undifferentiated; anaplastic; Grade IV	Positive histology	9260/3: Ewing sarcoma	T2	N0	M0	None; diagnosed at autopsy	Not recommended	No radiation and/or cancer-directed surgery	Beam radiation	Yes	140	400	0	0	Regional	Married (including common law)	794	1742	2952	5344	885	593	3883	12	Dead	Active follow-up	Dead (attributable to this cancer dx)	Alive or dead due to cancer
42	White	Male	C34.3-Lower lobe, lung	Unknown	Positive histology	9260/3: Ewing sarcoma	NA	NA	NA	None; diagnosed at autopsy	Not recommended	No radiation and/or cancer-directed surgery	None/Unknown	Yes	999	999	999	99	Unstaged	Single (never married)	1504	3153	1352	3940	1678	1200	2967	23	Dead	Active follow-up	Dead (attributable to this cancer dx)	Alive or dead due to cancer
15	White	Male	C40.2-Long bones of lower limb and associated joints	Unknown	Positive histology	9260/3: Ewing sarcoma	T2	N0	M0	None; diagnosed at autopsy	Surgery performed	No radiation and/or cancer-directed surgery	None/Unknown	No/Unknown	135	400	0	0	Regional	Single (never married)	1504	3153	1352	3940	1678	1200	2967	9	Dead	Active follow-up	Dead (attributable to this cancer dx)	Alive or dead due to cancer
9	White	Female	C40.2-Long bones of lower limb and associated joints	Unknown	Positive histology	9260/3: Ewing sarcoma	T1	N0	M0	None; diagnosed at autopsy	Recommended, unknown if performed	No radiation and/or cancer-directed surgery	None/Unknown	Yes	66	300	0	0	Localized	Single (never married)	794	1742	2952	5344	885	593	3883	1	Alive	Active follow-up	Alive or dead of other cause	Alive or dead due to cancer
17	White	Female	C49.1-Conn, subcutaneous, other soft tis: upr limb, shoulder	Unknown	Positive histology	9260/3: Ewing sarcoma	T2a	N0	M0	None; diagnosed at autopsy	Surgery performed	Radiation after surgery	Beam radiation	Yes	65	310	0	0	Localized	Married (including common law)	1090	2076	2942	5404	849	671	3636	63	Alive	Active follow-up	Alive or dead of other cause	Alive or dead due to cancer
10	White	Male	C41.3-Rib, sternum, clavicle and associated joints	Unknown	Positive histology	9260/3: Ewing sarcoma	T1	N0	M0	None; diagnosed at autopsy	Surgery performed	No radiation and/or cancer-directed surgery	None/Unknown	Yes	18	800	0	0	Distant	Single (never married)	794	1742	2952	5344	885	593	3883	29	Dead	Active follow-up	Dead (attributable to this cancer dx)	Alive or dead due to cancer
44	White	Male	C49.1-Conn, subcutaneous, other soft tis: upr limb, shoulder	Undifferentiated; anaplastic; Grade IV	Positive histology	9260/3: Ewing sarcoma	TX	NX	MX	None; diagnosed at autopsy	Surgery performed	No radiation and/or cancer-directed surgery	None/Unknown	Yes	999	999	999	99	Unstaged	Single (never married)	1504	3153	1352	3940	1678	1200	2967	10	Dead	Active follow-up	Dead (attributable to this cancer dx)	Alive or dead due to cancer
15	White	Female	C49.0-Conn, subcutaneous, other soft tis: head, face, neck	Undifferentiated; anaplastic; Grade IV	Positive histology	9260/3: Ewing sarcoma	T2a	N0	M0	None; diagnosed at autopsy	Not recommended	No radiation and/or cancer-directed surgery	Beam radiation	Yes	70	410	0	0	Regional	Single (never married)	1055	2054	3081	6461	696	504	3893	20	Dead	Active follow-up	Dead (attributable to this cancer dx)	Alive or dead due to cancer
11	White	Male	C40.2-Long bones of lower limb and associated joints	Undifferentiated; anaplastic; Grade IV	Positive histology	9260/3: Ewing sarcoma	T1	N0	M0	None; diagnosed at autopsy	Surgery performed	Radiation prior to surgery	Beam radiation	Yes	47	400	0	0	Regional	Single (never married)	1055	2054	3081	6461	696	504	3893	91	Alive	Active follow-up	Alive or dead of other cause	Alive or dead due to cancer
21	White	Male	C49.2-Conn, subcutaneous, other soft tis: lower limb, hip	Poorly differentiated; Grade III	Positive histology	9260/3: Ewing sarcoma	T2b	N0	M0	None; diagnosed at autopsy	Surgery performed	Radiation prior to surgery	Beam radiation	Yes	76	120	0	0	Localized	Single (never married)	1055	2054	3081	6461	696	504	3893	43	Dead	Active follow-up	Dead (attributable to this cancer dx)	Alive or dead due to cancer
12	White	Male	C41.4-Pelvic bones, sacrum, coccyx and associated joints	Undifferentiated; anaplastic; Grade IV	Positive histology	9260/3: Ewing sarcoma	T2	N0	M0	None; diagnosed at autopsy	Not recommended	No radiation and/or cancer-directed surgery	Beam radiation	Yes	100	300	0	0	Localized	Single (never married)	1366	2964	1405	4470	1229	1165	2770	44	Dead	Active follow-up	Dead (attributable to this cancer dx)	Alive or dead due to cancer
22	White	Male	C41.4-Pelvic bones, sacrum, coccyx and associated joints	Unknown	Positive histology	9260/3: Ewing sarcoma	T3	N0	M1b	None; diagnosed at autopsy	Not recommended	No radiation and/or cancer-directed surgery	Beam radiation	Yes	999	820	0	40	Distant	Single (never married)	1040	1990	2695	6529	635	520	3798	8	Dead	Active follow-up	Dead (attributable to this cancer dx)	Alive or dead due to cancer
22	White	Female	C41.4-Pelvic bones, sacrum, coccyx and associated joints	Unknown	Positive exfoliative cytology, no positive histology	9260/3: Ewing sarcoma	TX	NX	M0	None; diagnosed at autopsy	Not recommended	No radiation and/or cancer-directed surgery	Beam radiation	Yes	999	400	999	0	Regional	Single (never married)	669	1673	2481	5072	1027	666	3751	94	Alive	Active follow-up	Alive or dead of other cause	Alive or dead due to cancer
17	White	Male	C41.0-Bones of skull and face and associated joints	Unknown	Positive histology	9260/3: Ewing sarcoma	T1	NX	M1b	None; diagnosed at autopsy	Surgery performed	Radiation after surgery	Beam radiation	Yes	41	100	999	40	Distant	Single (never married)	2158	3619	1105	3801	1692	1309	2683	84	Alive	Active follow-up	Alive or dead of other cause	Alive or dead due to cancer
14	White	Male	C49.6-Conn, subcutaneous, other soft tis: trunk, NOS	Unknown	Positive histology	9260/3: Ewing sarcoma	T1a	N0	M0	None; diagnosed at autopsy	Surgery performed	No radiation and/or cancer-directed surgery	None/Unknown	Yes	45	310	0	0	Localized	Single (never married)	1055	2054	3081	6461	696	504	3893	90	Alive	Active follow-up	Alive or dead of other cause	Alive or dead due to cancer
1	Other (American Indian/AK Native, Asian/Pacific Islander)	Female	C41.0-Bones of skull and face and associated joints	Undifferentiated; anaplastic; Grade IV	Positive histology	9260/3: Ewing sarcoma	T1	N0	M0	None; diagnosed at autopsy	Surgery performed	Radiation after surgery	Beam radiation	Yes	41	600	0	0	Regional	Single (never married)	1055	2054	3081	6461	696	504	3893	90	Alive	Active follow-up	Alive or dead of other cause	Alive or dead due to cancer
36	White	Female	C44.7-Skin of lower limb and hip	Unknown	Positive histology	9260/3: Ewing sarcoma	NA	NA	NA	None; diagnosed at autopsy	Surgery performed	No radiation and/or cancer-directed surgery	None/Unknown	Yes	8	500	0	0	Regional	Married (including common law)	670	1508	2854	6192	470	427	3627	84	Alive	Active follow-up	Alive or dead of other cause	Alive or dead due to cancer
9	White	Male	C40.2-Long bones of lower limb and associated joints	Poorly differentiated; Grade III	Positive histology	9260/3: Ewing sarcoma	T1	N0	M1b	None; diagnosed at autopsy	Surgery performed	No radiation and/or cancer-directed surgery	None/Unknown	Yes	20	300	0	40	Distant	Single (never married)	2302	3832	1150	3630	1881	1275	2724	29	Dead	Active follow-up	Dead (attributable to this cancer dx)	Alive or dead due to cancer
22	White	Male	C40.2-Long bones of lower limb and associated joints	Unknown	Positive histology	9260/3: Ewing sarcoma	T2	N0	M0	None; diagnosed at autopsy	Surgery performed	Radiation after surgery	Beam radiation	Yes	185	300	0	0	Localized	Married (including common law)	1055	2054	3081	6461	696	504	3893	12	Alive	Active follow-up	Alive or dead of other cause	Alive or dead due to cancer
47	Black	Male	C49.5-Conn, subcutaneous, other soft tis: pelvis	Undifferentiated; anaplastic; Grade IV	Positive histology	9260/3: Ewing sarcoma	TX	N1	M1	Non-primary surgical procedure to other regional sites	Not recommended	No radiation and/or cancer-directed surgery	None/Unknown	No/Unknown	999	999	100	50	Distant	Single (never married)	1040	2579	1592	4657	1257	831	2994	0	Dead	Active follow-up	Dead (attributable to this cancer dx)	Alive or dead due to cancer
14	White	Female	C41.2-Vertebral column	Unknown	Positive histology	9260/3: Ewing sarcoma	T1	NX	M0	Non-primary surgical procedure performed	Surgery performed	Radiation after surgery	Beam radiation	Yes	16	300	999	0	Localized	Single (never married)	1058	2505	1663	4841	1068	753	2960	91	Alive	Active follow-up	Alive or dead of other cause	Alive or dead due to cancer
15	White	Male	C41.0-Bones of skull and face and associated joints	Unknown	Positive histology	9260/3: Ewing sarcoma	T1	N0	M1b	None; diagnosed at autopsy	Surgery performed	Radiation after surgery	Beam radiation	Yes	55	700	0	40	Distant	Single (never married)	1040	2579	1592	4657	1257	831	2994	13	Dead	Active follow-up	Dead (attributable to this cancer dx)	Alive or dead due to cancer
18	White	Female	C49.3-Conn, subcutaneous, other soft tis: thorax	Undifferentiated; anaplastic; Grade IV	Positive histology	9260/3: Ewing sarcoma	TX	N0	M0	None; diagnosed at autopsy	Surgery performed	No radiation and/or cancer-directed surgery	None/Unknown	Yes	999	300	0	0	Localized	Single (never married)	1833	3248	1755	3846	1760	1181	3082	87	Alive	Active follow-up	Alive or dead of other cause	Alive or dead due to cancer
67	White	Male	C40.2-Long bones of lower limb and associated joints	Unknown	Positive histology	9260/3: Ewing sarcoma	T1	N0	M0	None; diagnosed at autopsy	Surgery performed	No radiation and/or cancer-directed surgery	None/Unknown	Yes	72	400	0	0	Regional	Married (including common law)	1055	2054	3081	6461	696	504	3893	89	Alive	Active follow-up	Alive or dead of other cause	Alive or dead due to cancer
12	White	Male	C40.2-Long bones of lower limb and associated joints	Undifferentiated; anaplastic; Grade IV	Positive histology	9260/3: Ewing sarcoma	T2	N0	M0	None; diagnosed at autopsy	Surgery performed	No radiation and/or cancer-directed surgery	None/Unknown	Yes	87	400	0	0	Regional	Single (never married)	1055	2054	3081	6461	696	504	3893	87	Alive	Active follow-up	Alive or dead of other cause	Alive or dead due to cancer
17	Black	Male	C40.2-Long bones of lower limb and associated joints	Unknown	Positive histology	9260/3: Ewing sarcoma	T2	N0	M0	None; diagnosed at autopsy	Surgery performed	No radiation and/or cancer-directed surgery	None/Unknown	Yes	126	400	0	0	Regional	Single (never married)	1058	2505	1663	4841	1068	753	2960	69	Dead	Active follow-up	Dead (attributable to this cancer dx)	Alive or dead due to cancer
15	White	Male	C41.4-Pelvic bones, sacrum, coccyx and associated joints	Undifferentiated; anaplastic; Grade IV	Positive histology	9260/3: Ewing sarcoma	T2	N0	M0	None; diagnosed at autopsy	Surgery performed	No radiation and/or cancer-directed surgery	None/Unknown	Yes	100	400	0	0	Regional	Single (never married)	1055	2054	3081	6461	696	504	3893	73	Alive	Active follow-up	Alive or dead of other cause	Alive or dead due to cancer
5	White	Male	C40.0-Long bones: upper limb, scapula, and associated joints	Unknown	Radiography without microscopic confirm	9260/3: Ewing sarcoma	TX	N0	M1b	None; diagnosed at autopsy	Not recommended	No radiation and/or cancer-directed surgery	None/Unknown	No/Unknown	999	800	0	40	Distant	Single (never married)	1833	3248	1755	3846	1760	1181	3082	0	Alive	Active follow-up	Alive or dead of other cause	Alive or dead due to cancer
10	White	Female	C41.3-Rib, sternum, clavicle and associated joints	Unknown	Positive histology	9260/3: Ewing sarcoma	T2	N0	M0	None; diagnosed at autopsy	Surgery performed	No radiation and/or cancer-directed surgery	None/Unknown	Yes	190	400	0	0	Regional	Single (never married)	2383	4096	1033	3523	1945	1263	2953	88	Alive	Active follow-up	Alive or dead of other cause	Alive or dead due to cancer
34	White	Male	C41.1-Mandible	Unknown	Positive histology	9260/3: Ewing sarcoma	T1	N0	M0	None; diagnosed at autopsy	Recommended but not performed, patient refused	No radiation and/or cancer-directed surgery	Beam radiation	Yes	77	400	0	0	Regional	Separated	1504	3153	1352	3940	1678	1200	2967	7	Dead	Active follow-up	Dead (attributable to this cancer dx)	Alive or dead due to cancer
50	White	Female	C41.2-Vertebral column	Unknown	Positive histology	9260/3: Ewing sarcoma	T1	N0	M0	None; diagnosed at autopsy	Not recommended	No radiation and/or cancer-directed surgery	None/Unknown	No/Unknown	47	400	0	0	Regional	Single (never married)	1504	3153	1352	3940	1678	1200	2967	1	Dead	Active follow-up	N/A not first tumor	N/A not first tumor
9	White	Male	C41.4-Pelvic bones, sacrum, coccyx and associated joints	Unknown	Positive histology	9260/3: Ewing sarcoma	TX	N1	M0	None; diagnosed at autopsy	Not recommended	No radiation and/or cancer-directed surgery	Beam radiation	Yes	999	600	800	0	Regional	Single (never married)	1040	2579	1592	4657	1257	831	2994	71	Alive	Active follow-up	Alive or dead of other cause	Alive or dead due to cancer
13	White	Female	C49.3-Conn, subcutaneous, other soft tis: thorax	Unknown	Positive histology	9260/3: Ewing sarcoma	T2b	N0	M1	None; diagnosed at autopsy	Surgery performed	No radiation and/or cancer-directed surgery	None/Unknown	Yes	65	120	0	40	Distant	Single (never married)	1040	1990	2695	6529	635	520	3798	79	Alive	Active follow-up	Alive or dead of other cause	Alive or dead due to cancer
11	White	Male	C49.3-Conn, subcutaneous, other soft tis: thorax	Unknown	Positive histology	9260/3: Ewing sarcoma	T1a	N0	M0	None; diagnosed at autopsy	Surgery performed	Radiation after surgery	Beam radiation	Yes	50	110	0	0	Localized	Single (never married)	1005	2022	3414	5162	949	715	4229	81	Alive	Active follow-up	Alive or dead of other cause	Alive or dead due to cancer
9	White	Female	C34.1-Upper lobe, lung	Unknown	Positive histology	9260/3: Ewing sarcoma	NA	NA	NA	None; diagnosed at autopsy	Not recommended	No radiation and/or cancer-directed surgery	Beam radiation	Yes	999	100	200	40	Distant	Single (never married)	1366	2964	1405	4470	1229	1165	2770	9	Dead	Active follow-up	Dead (attributable to this cancer dx)	Alive or dead due to cancer
15	White	Male	C49.4-Conn, subcutaneous, other soft tis: abdomen	Unknown	Positive histology	9260/3: Ewing sarcoma	T1a	N0	M0	None; diagnosed at autopsy	Surgery performed	No radiation and/or cancer-directed surgery	None/Unknown	Yes	38	310	0	0	Localized	Single (never married)	670	1508	2854	6192	470	427	3627	79	Alive	Active follow-up	Alive or dead of other cause	Alive or dead due to cancer
11	White	Male	C41.4-Pelvic bones, sacrum, coccyx and associated joints	Unknown	Positive histology	9260/3: Ewing sarcoma	T1	N0	M1a	None; diagnosed at autopsy	Not recommended	No radiation and/or cancer-directed surgery	Beam radiation	Yes	80	600	0	30	Distant	Single (never married)	794	1742	2952	5344	885	593	3883	35	Dead	Active follow-up	Dead (attributable to this cancer dx)	Alive or dead due to cancer
35	Black	Male	C40.2-Long bones of lower limb and associated joints	Unknown	Positive histology	9260/3: Ewing sarcoma	TX	NX	M1a	None; diagnosed at autopsy	Surgery performed	No radiation and/or cancer-directed surgery	None/Unknown	Yes	11	999	999	30	Distant	Single (never married)	589	1774	2184	4101	1218	934	3288	11	Dead	Active follow-up	Dead (attributable to this cancer dx)	Alive or dead due to cancer
16	White	Male	C49.3-Conn, subcutaneous, other soft tis: thorax	Undifferentiated; anaplastic; Grade IV	Positive histology	9260/3: Ewing sarcoma	T2b	N0	M0	None; diagnosed at autopsy	Surgery performed	Radiation after surgery	Beam radiation	Yes	95	620	0	0	Regional	Single (never married)	1504	3153	1352	3940	1678	1200	2967	78	Alive	Active follow-up	Alive or dead of other cause	Alive or dead due to cancer
4	White	Female	C41.4-Pelvic bones, sacrum, coccyx and associated joints	Unknown	Positive exfoliative cytology, no positive histology	9260/3: Ewing sarcoma	T1	NX	M0	None; diagnosed at autopsy	Not recommended	No radiation and/or cancer-directed surgery	Beam radiation	Yes	65	600	999	0	Regional	Single (never married)	1058	2505	1663	4841	1068	753	2960	85	Alive	Active follow-up	Alive or dead of other cause	Alive or dead due to cancer
0	White	Male	C40.2-Long bones of lower limb and associated joints	Unknown	Positive histology	9260/3: Ewing sarcoma	TX	NX	M1b	None; diagnosed at autopsy	Not recommended	No radiation and/or cancer-directed surgery	None/Unknown	Yes	999	400	999	40	Distant	Single (never married)	794	1742	2952	5344	885	593	3883	2	Dead	Active follow-up	Dead (attributable to this cancer dx)	Alive or dead due to cancer
14	White	Male	C41.2-Vertebral column	Unknown	Positive histology	9260/3: Ewing sarcoma	TX	N0	M0	None; diagnosed at autopsy	Surgery performed	Radiation after surgery	Beam radiation	Yes	999	300	0	0	Localized	Single (never married)	1058	2505	1663	4841	1068	753	2960	39	Dead	Active follow-up	Dead (attributable to this cancer dx)	Alive or dead due to cancer
3	White	Male	C41.3-Rib, sternum, clavicle and associated joints	Unknown	Positive histology	9260/3: Ewing sarcoma	T1	N0	M0	None; diagnosed at autopsy	Not recommended	No radiation and/or cancer-directed surgery	None/Unknown	Yes	78	400	0	0	Regional	Single (never married)	794	1742	2952	5344	885	593	3883	51	Alive	Active follow-up	N/A not first tumor	N/A not first tumor
8	White	Female	C41.3-Rib, sternum, clavicle and associated joints	Unknown	Radiography without microscopic confirm	9260/3: Ewing sarcoma	T1	N0	M0	None; diagnosed at autopsy	Not recommended	No radiation and/or cancer-directed surgery	None/Unknown	No/Unknown	18	300	0	0	Localized	Single (never married)	1833	3248	1755	3846	1760	1181	3082	69	Alive	Active follow-up	Alive or dead of other cause	Alive or dead due to cancer
23	White	Female	C41.4-Pelvic bones, sacrum, coccyx and associated joints	Unknown	Positive histology	9260/3: Ewing sarcoma	T1	N0	M0	None; diagnosed at autopsy	Not recommended	No radiation and/or cancer-directed surgery	Radiation, NOS method or source not specified	Yes	66	400	0	0	Regional	Single (never married)	669	1673	2481	5072	1027	666	3751	76	Alive	Active follow-up	Alive or dead of other cause	Alive or dead due to cancer
30	Other (American Indian/AK Native, Asian/Pacific Islander)	Male	C49.3-Conn, subcutaneous, other soft tis: thorax	Undifferentiated; anaplastic; Grade IV	Positive histology	9260/3: Ewing sarcoma	T2b	N1	M1	None; diagnosed at autopsy	Not recommended	No radiation and/or cancer-directed surgery	None/Unknown	No/Unknown	130	620	800	40	Distant	Single (never married)	1504	3153	1352	3940	1678	1200	2967	7	Dead	Active follow-up	Dead (attributable to this cancer dx)	Alive or dead due to cancer
7	White	Male	C49.0-Conn, subcutaneous, other soft tis: head, face, neck	Unknown	Positive histology	9260/3: Ewing sarcoma	T1b	N0	M1	None; diagnosed at autopsy	Not recommended	No radiation and/or cancer-directed surgery	Beam radiation	Yes	22	800	0	40	Distant	Single (never married)	1833	3248	1755	3846	1760	1181	3082	6	Dead	Active follow-up	Dead (attributable to this cancer dx)	Alive or dead due to cancer
49	White	Male	C49.3-Conn, subcutaneous, other soft tis: thorax	Unknown	Positive histology	9260/3: Ewing sarcoma	T2b	N0	M1	Non-primary surgical procedure to distant lymph node(s)	Surgery performed	Radiation prior to surgery	Beam radiation	Yes	115	600	0	40	Distant	Married (including common law)	794	1742	2952	5344	885	593	3883	65	Dead	Active follow-up	Dead (attributable to this cancer dx)	Alive or dead due to cancer
17	White	Female	C41.4-Pelvic bones, sacrum, coccyx and associated joints	Undifferentiated; anaplastic; Grade IV	Positive histology	9260/3: Ewing sarcoma	TX	N0	M1a	None; diagnosed at autopsy	Not recommended	No radiation and/or cancer-directed surgery	Beam radiation	Yes	999	400	0	30	Distant	Single (never married)	1055	2054	3081	6461	696	504	3893	68	Alive	Active follow-up	Alive or dead of other cause	Alive or dead due to cancer
10	White	Male	C41.2-Vertebral column	Unknown	Positive histology	9260/3: Ewing sarcoma	T2	N0	M1b	None; diagnosed at autopsy	Surgery performed	No radiation and/or cancer-directed surgery	None/Unknown	Yes	101	400	0	40	Distant	Single (never married)	794	1742	2952	5344	885	593	3883	26	Dead	Active follow-up	Dead (attributable to this cancer dx)	Alive or dead due to cancer
21	White	Male	C40.0-Long bones: upper limb, scapula, and associated joints	Undifferentiated; anaplastic; Grade IV	Positive histology	9260/3: Ewing sarcoma	T2	N1	M0	None; diagnosed at autopsy	Surgery performed	Radiation prior to surgery	Beam radiation	Yes	200	400	100	0	Regional	Single (never married)	1040	1990	2695	6529	635	520	3798	75	Alive	Active follow-up	Alive or dead of other cause	Alive or dead due to cancer
37	White	Male	C48.0-Retroperitoneum	Undifferentiated; anaplastic; Grade IV	Positive histology	9260/3: Ewing sarcoma	T2b	N0	M0	None; diagnosed at autopsy	Surgery performed	Radiation after surgery	Beam radiation	Yes	125	100	0	0	Localized	Single (never married)	1573	3117	1037	3811	1578	1357	3042	29	Dead	Active follow-up	Dead (attributable to this cancer dx)	Alive or dead due to cancer
8	White	Female	C40.0-Long bones: upper limb, scapula, and associated joints	Undifferentiated; anaplastic; Grade IV	Positive histology	9260/3: Ewing sarcoma	T2	N0	M0	None; diagnosed at autopsy	Surgery performed	No radiation and/or cancer-directed surgery	None/Unknown	Yes	100	400	0	0	Regional	Single (never married)	1055	2054	3081	6461	696	504	3893	76	Alive	Active follow-up	Alive or dead of other cause	Alive or dead due to cancer
13	White	Female	C41.4-Pelvic bones, sacrum, coccyx and associated joints	Undifferentiated; anaplastic; Grade IV	Positive histology	9260/3: Ewing sarcoma	T2	N0	M0	None; diagnosed at autopsy	Surgery performed	No radiation and/or cancer-directed surgery	None/Unknown	Yes	109	400	0	0	Regional	Single (never married)	1055	2054	3081	6461	696	504	3893	10	Dead	Active follow-up	Dead (attributable to this cancer dx)	Alive or dead due to cancer
26	White	Male	C49.5-Conn, subcutaneous, other soft tis: pelvis	Unknown	Positive histology	9260/3: Ewing sarcoma	T2b	N0	M1	None; diagnosed at autopsy	Not recommended	No radiation and/or cancer-directed surgery	Beam radiation	Yes	66	600	0	40	Distant	Single (never married)	1058	2505	1663	4841	1068	753	2960	11	Dead	Active follow-up	Dead (attributable to this cancer dx)	Alive or dead due to cancer
16	White	Female	C40.2-Long bones of lower limb and associated joints	Unknown	Positive histology	9260/3: Ewing sarcoma	T2	N0	M0	None; diagnosed at autopsy	Surgery performed	No radiation and/or cancer-directed surgery	None/Unknown	Yes	100	400	0	0	Regional	Single (never married)	2383	4096	1033	3523	1945	1263	2953	77	Alive	Active follow-up	Alive or dead of other cause	Alive or dead due to cancer
18	White	Male	C49.0-Conn, subcutaneous, other soft tis: head, face, neck	Poorly differentiated; Grade III	Positive histology	9260/3: Ewing sarcoma	T2b	N1	M1	None; diagnosed at autopsy	Surgery performed	Radiation after surgery	Beam radiation	Yes	85	420	100	40	Distant	Single (never married)	1058	2505	1663	4841	1068	753	2960	32	Dead	Active follow-up	Dead (attributable to this cancer dx)	Alive or dead due to cancer
10	White	Male	C41.4-Pelvic bones, sacrum, coccyx and associated joints	Undifferentiated; anaplastic; Grade IV	Positive histology	9260/3: Ewing sarcoma	T2	N0	M0	None; diagnosed at autopsy	Surgery performed	No radiation and/or cancer-directed surgery	None/Unknown	Yes	96	800	0	0	Distant	Single (never married)	1040	2579	1592	4657	1257	831	2994	78	Alive	Active follow-up	Alive or dead of other cause	Alive or dead due to cancer
12	White	Female	C41.4-Pelvic bones, sacrum, coccyx and associated joints	Moderately differentiated; Grade II	Positive histology	9260/3: Ewing sarcoma	T1	N0	M0	None; diagnosed at autopsy	Not recommended	No radiation and/or cancer-directed surgery	Beam radiation	Yes	50	400	0	0	Regional	Single (never married)	819	2434	1129	3728	1296	975	2663	34	Dead	Active follow-up	Dead (attributable to this cancer dx)	Alive or dead due to cancer
21	White	Male	C72.0-Spinal cord	Unknown	Positive histology	9260/3: Ewing sarcoma	NA	NA	NA	None; diagnosed at autopsy	Not recommended	No radiation and/or cancer-directed surgery	None/Unknown	Yes	999	600	988	40	Unstaged	Single (never married)	1055	2054	3081	6461	696	504	3893	3	Dead	Active follow-up	Dead (attributable to this cancer dx)	Alive or dead due to cancer
11	White	Male	C41.3-Rib, sternum, clavicle and associated joints	Undifferentiated; anaplastic; Grade IV	Positive histology	9260/3: Ewing sarcoma	T2	N0	M0	None; diagnosed at autopsy	Surgery performed	Radiation after surgery	Beam radiation	Yes	130	300	0	0	Localized	Single (never married)	1055	2054	3081	6461	696	504	3893	72	Alive	Active follow-up	Alive or dead of other cause	Alive or dead due to cancer
18	Other (American Indian/AK Native, Asian/Pacific Islander)	Male	C40.2-Long bones of lower limb and associated joints	Unknown	Positive histology	9260/3: Ewing sarcoma	T2	N0	M0	None; diagnosed at autopsy	Not recommended	No radiation and/or cancer-directed surgery	Beam radiation	Yes	100	600	0	0	Regional	Single (never married)	1331	2877	1453	4692	1351	1035	2855	74	Alive	Active follow-up	Alive or dead of other cause	Alive or dead due to cancer
18	White	Male	C49.2-Conn, subcutaneous, other soft tis: lower limb, hip	Unknown	Positive histology	9260/3: Ewing sarcoma	T1a	N1	M0	Non-primary surgical procedure to distant lymph node(s)	Surgery performed	No radiation and/or cancer-directed surgery	None/Unknown	Yes	45	110	100	0	Regional	Single (never married)	1040	1990	2695	6529	635	520	3798	7	Dead	Active follow-up	Dead (attributable to this cancer dx)	Alive or dead due to cancer
6	White	Male	C49.3-Conn, subcutaneous, other soft tis: thorax	Unknown	Positive histology	9260/3: Ewing sarcoma	T2b	N0	M0	None; diagnosed at autopsy	Not recommended	No radiation and/or cancer-directed surgery	Beam radiation	Yes	58	320	0	0	Localized	Single (never married)	794	1742	2952	5344	885	593	3883	59	Dead	Active follow-up	Alive or dead of other cause	Dead (attributable to causes other than this cancer dx)
35	White	Female	C49.2-Conn, subcutaneous, other soft tis: lower limb, hip	Undifferentiated; anaplastic; Grade IV	Positive histology	9260/3: Ewing sarcoma	T2b	N0	M1	None; diagnosed at autopsy	Not recommended	No radiation and/or cancer-directed surgery	None/Unknown	Yes	70	420	0	40	Distant	Married (including common law)	1836	3461	1200	3923	1586	1324	2642	10	Dead	Active follow-up	Dead (attributable to this cancer dx)	Alive or dead due to cancer
6	White	Male	C40.2-Long bones of lower limb and associated joints	Unknown	Positive histology	9260/3: Ewing sarcoma	T1	N0	M0	None; diagnosed at autopsy	Surgery performed	No radiation and/or cancer-directed surgery	None/Unknown	Yes	67	400	0	0	Regional	Single (never married)	1090	2076	2942	5404	849	671	3636	56	Alive	Active follow-up	Alive or dead of other cause	Alive or dead due to cancer
36	White	Male	C49.2-Conn, subcutaneous, other soft tis: lower limb, hip	Unknown	Positive histology	9260/3: Ewing sarcoma	T2b	N0	M0	None; diagnosed at autopsy	Surgery performed	No radiation and/or cancer-directed surgery	None/Unknown	Yes	100	320	0	0	Localized	Married (including common law)	1055	2054	3081	6461	696	504	3893	70	Alive	Active follow-up	Alive or dead of other cause	Alive or dead due to cancer
44	White	Female	C49.3-Conn, subcutaneous, other soft tis: thorax	Poorly differentiated; Grade III	Positive histology	9260/3: Ewing sarcoma	T1b	N0	M0	None; diagnosed at autopsy	Surgery performed	No radiation and/or cancer-directed surgery	None/Unknown	No/Unknown	20	620	0	0	Regional	Married (including common law)	1055	2054	3081	6461	696	504	3893	22	Alive	Active follow-up	N/A not first tumor	N/A not first tumor
14	White	Male	C40.2-Long bones of lower limb and associated joints	Undifferentiated; anaplastic; Grade IV	Positive histology	9260/3: Ewing sarcoma	T2	N0	M0	None; diagnosed at autopsy	Surgery performed	Radiation prior to surgery	Beam radiation	Yes	165	400	0	0	Regional	Single (never married)	1040	2579	1592	4657	1257	831	2994	71	Alive	Active follow-up	Alive or dead of other cause	Alive or dead due to cancer
11	White	Female	C41.3-Rib, sternum, clavicle and associated joints	Undifferentiated; anaplastic; Grade IV	Positive histology	9260/3: Ewing sarcoma	T2	N0	M1b	None; diagnosed at autopsy	Surgery performed	Radiation after surgery	Beam radiation	Yes	114	800	0	40	Distant	Single (never married)	1055	2054	3081	6461	696	504	3893	71	Alive	Active follow-up	Alive or dead of other cause	Alive or dead due to cancer
19	White	Male	C41.4-Pelvic bones, sacrum, coccyx and associated joints	Unknown	Positive histology	9260/3: Ewing sarcoma	T1	N0	M0	None; diagnosed at autopsy	Not recommended	No radiation and/or cancer-directed surgery	Beam radiation	Yes	80	100	0	0	Localized	Single (never married)	1058	2505	1663	4841	1068	753	2960	68	Alive	Active follow-up	Alive or dead of other cause	Alive or dead due to cancer
23	White	Male	C40.2-Long bones of lower limb and associated joints	Unknown	Positive histology	9260/3: Ewing sarcoma	T2	N0	M1b	None; diagnosed at autopsy	Not recommended	No radiation and/or cancer-directed surgery	Beam radiation	Yes	223	600	0	50	Distant	Single (never married)	418	1674	1660	4049	1135	874	3190	36	Dead	Active follow-up	Dead (attributable to this cancer dx)	Alive or dead due to cancer
52	White	Male	C41.3-Rib, sternum, clavicle and associated joints	Undifferentiated; anaplastic; Grade IV	Positive histology	9260/3: Ewing sarcoma	T2	N0	M0	None; diagnosed at autopsy	Surgery performed	No radiation and/or cancer-directed surgery	None/Unknown	Yes	180	600	0	0	Regional	Single (never married)	1055	2054	3081	6461	696	504	3893	18	Dead	Active follow-up	Dead (attributable to this cancer dx)	Alive or dead due to cancer
13	White	Female	C49.3-Conn, subcutaneous, other soft tis: thorax	Unknown	Positive histology	9260/3: Ewing sarcoma	T1NOS	N0	M0	None; diagnosed at autopsy	Surgery performed	Radiation after surgery	Beam radiation	Yes	20	300	0	0	Localized	Single (never married)	1366	2964	1405	4470	1229	1165	2770	7	Alive	Active follow-up	N/A not first tumor	N/A not first tumor
15	Other (American Indian/AK Native, Asian/Pacific Islander)	Male	C41.4-Pelvic bones, sacrum, coccyx and associated joints	Unknown	Positive histology	9260/3: Ewing sarcoma	TX	N0	M0	None; diagnosed at autopsy	Not recommended	No radiation and/or cancer-directed surgery	Beam radiation	Yes	999	300	0	0	Localized	Single (never married)	794	1742	2952	5344	885	593	3883	45	Dead	Active follow-up	Dead (attributable to this cancer dx)	Alive or dead due to cancer
19	White	Male	C41.4-Pelvic bones, sacrum, coccyx and associated joints	Unknown	Positive histology	9260/3: Ewing sarcoma	T2	N0	M0	None; diagnosed at autopsy	Surgery performed	Radiation after surgery	Beam radiation	Yes	85	400	0	0	Regional	Single (never married)	669	1673	2481	5072	1027	666	3751	9	Dead	Active follow-up	Dead (attributable to this cancer dx)	Alive or dead due to cancer
65	White	Female	C56.9-Ovary	Unknown	Positive histology	9260/3: Ewing sarcoma	NA	NA	NA	None; diagnosed at autopsy	Surgery performed	No radiation and/or cancer-directed surgery	None/Unknown	No/Unknown	140	800	999	40	Distant	Married (including common law)	1058	2505	1663	4841	1068	753	2960	1	Dead	Active follow-up	Dead (attributable to this cancer dx)	Alive or dead due to cancer
12	White	Female	C49.2-Conn, subcutaneous, other soft tis: lower limb, hip	Unknown	Positive histology	9260/3: Ewing sarcoma	T1b	N0	M1	None; diagnosed at autopsy	Not recommended	No radiation and/or cancer-directed surgery	None/Unknown	Yes	37	800	0	40	Distant	Single (never married)	1833	3248	1755	3846	1760	1181	3082	1	Dead	Active follow-up	Dead (attributable to this cancer dx)	Alive or dead due to cancer
18	White	Female	C41.4-Pelvic bones, sacrum, coccyx and associated joints	Unknown	Positive histology	9260/3: Ewing sarcoma	TX	N0	M1b	None; diagnosed at autopsy	Not recommended	No radiation and/or cancer-directed surgery	Beam radiation	Yes	999	400	0	40	Distant	Single (never married)	794	1742	2952	5344	885	593	3883	49	Dead	Active follow-up	Dead (attributable to this cancer dx)	Alive or dead due to cancer
16	White	Male	C40.2-Long bones of lower limb and associated joints	Undifferentiated; anaplastic; Grade IV	Positive histology	9260/3: Ewing sarcoma	T2	N0	M0	None; diagnosed at autopsy	Surgery performed	No radiation and/or cancer-directed surgery	None/Unknown	Yes	138	400	0	0	Regional	Single (never married)	1040	2579	1592	4657	1257	831	2994	66	Alive	Active follow-up	Alive or dead of other cause	Alive or dead due to cancer
73	White	Male	C41.9-Bone, NOS	Undifferentiated; anaplastic; Grade IV	Positive histology	9260/3: Ewing sarcoma	TX	NX	M1b	None; diagnosed at autopsy	Not recommended	No radiation and/or cancer-directed surgery	None/Unknown	Yes	999	999	999	40	Distant	Married (including common law)	1055	2054	3081	6461	696	504	3893	10	Alive	Active follow-up	Alive or dead of other cause	Alive or dead due to cancer
19	Black	Female	C40.2-Long bones of lower limb and associated joints	Undifferentiated; anaplastic; Grade IV	Positive histology	9260/3: Ewing sarcoma	T2	N0	M0	None; diagnosed at autopsy	Surgery performed	No radiation and/or cancer-directed surgery	None/Unknown	Yes	989	300	0	0	Localized	Single (never married)	1366	2964	1405	4470	1229	1165	2770	33	Dead	Active follow-up	Dead (attributable to this cancer dx)	Alive or dead due to cancer
16	White	Male	C49.3-Conn, subcutaneous, other soft tis: thorax	Unknown	Positive histology	9260/3: Ewing sarcoma	T2b	N0	M0	None; diagnosed at autopsy	Surgery performed	Radiation after surgery	Beam radiation	Yes	55	620	0	0	Regional	Single (never married)	794	1742	2952	5344	885	593	3883	64	Alive	Active follow-up	Alive or dead of other cause	Alive or dead due to cancer
16	White	Male	C41.4-Pelvic bones, sacrum, coccyx and associated joints	Undifferentiated; anaplastic; Grade IV	Positive histology	9260/3: Ewing sarcoma	T1	N0	M1b	None; diagnosed at autopsy	Surgery performed	Radiation after surgery	Beam radiation	Yes	71	600	0	50	Distant	Single (never married)	1055	2054	3081	6461	696	504	3893	63	Alive	Active follow-up	Alive or dead of other cause	Alive or dead due to cancer
20	White	Male	C41.4-Pelvic bones, sacrum, coccyx and associated joints	Undifferentiated; anaplastic; Grade IV	Positive histology	9260/3: Ewing sarcoma	T1	N0	M1a	None; diagnosed at autopsy	Not recommended	No radiation and/or cancer-directed surgery	Beam radiation	Yes	80	600	0	30	Distant	Single (never married)	312	955	3028	6586	394	402	4118	10	Dead	Active follow-up	Dead (attributable to this cancer dx)	Alive or dead due to cancer
19	White	Female	C40.0-Long bones: upper limb, scapula, and associated joints	Undifferentiated; anaplastic; Grade IV	Positive histology	9260/3: Ewing sarcoma	T2	N0	M0	None; diagnosed at autopsy	Surgery performed	No radiation and/or cancer-directed surgery	None/Unknown	Yes	84	300	0	0	Localized	Married (including common law)	794	1742	2952	5344	885	593	3883	63	Alive	Active follow-up	Alive or dead of other cause	Alive or dead due to cancer
40	Other (American Indian/AK Native, Asian/Pacific Islander)	Male	C64.9-Kidney, NOS	Unknown	Positive histology	9260/3: Ewing sarcoma	NA	NA	NA	None; diagnosed at autopsy	Surgery performed	No radiation and/or cancer-directed surgery	None/Unknown	Yes	90	600	210	40	Distant	Married (including common law)	1055	2054	3081	6461	696	504	3893	33	Dead	Active follow-up	Alive or dead of other cause	Dead (attributable to causes other than this cancer dx)
56	Other (American Indian/AK Native, Asian/Pacific Islander)	Male	C41.2-Vertebral column	Unknown	Unknown	9260/3: Ewing sarcoma	TX	N0	M1b	None; diagnosed at autopsy	Surgery performed	No radiation and/or cancer-directed surgery	None/Unknown	Yes	999	999	0	40	Distant	Single (never married)	963	1960	2639	6141	563	429	3563	5	Dead	Active follow-up	N/A not first tumor	N/A not first tumor
29	White	Female	C49.1-Conn, subcutaneous, other soft tis: upr limb, shoulder	Unknown	Positive histology	9260/3: Ewing sarcoma	T2a	N1	M0	None; diagnosed at autopsy	Surgery performed	Radiation after surgery	Beam radiation	Yes	115	110	100	0	Regional	Single (never married)	794	1742	2952	5344	885	593	3883	14	Dead	Active follow-up	Dead (attributable to this cancer dx)	Alive or dead due to cancer
14	White	Female	C49.2-Conn, subcutaneous, other soft tis: lower limb, hip	Unknown	Positive histology	9260/3: Ewing sarcoma	T1NOS	N0	M0	None; diagnosed at autopsy	Surgery performed	No radiation and/or cancer-directed surgery	None/Unknown	Yes	50	100	0	0	Localized	Single (never married)	621	1624	2139	6060	607	612	3308	60	Alive	Active follow-up	Alive or dead of other cause	Alive or dead due to cancer
25	White	Female	C41.4-Pelvic bones, sacrum, coccyx and associated joints	Unknown	Positive histology	9260/3: Ewing sarcoma	T2	N0	M1b	None; diagnosed at autopsy	Not recommended	No radiation and/or cancer-directed surgery	Beam radiation	Yes	83	400	0	50	Distant	Single (never married)	589	1774	2184	4101	1218	934	3288	9	Dead	Active follow-up	Dead (attributable to this cancer dx)	Alive or dead due to cancer
6	White	Female	C40.2-Long bones of lower limb and associated joints	Unknown	Positive histology	9260/3: Ewing sarcoma	T1	N0	M0	None; diagnosed at autopsy	Surgery performed	No radiation and/or cancer-directed surgery	None/Unknown	Yes	68	400	0	0	Regional	Single (never married)	670	1508	2854	6192	470	427	3627	60	Alive	Active follow-up	Alive or dead of other cause	Alive or dead due to cancer
15	White	Female	C41.2-Vertebral column	Unknown	Positive exfoliative cytology, no positive histology	9260/3: Ewing sarcoma	T1	N0	M0	None; diagnosed at autopsy	Surgery performed	No radiation and/or cancer-directed surgery	None/Unknown	Yes	40	400	0	0	Regional	Single (never married)	669	1673	2481	5072	1027	666	3751	9	Dead	Active follow-up	Dead (attributable to this cancer dx)	Alive or dead due to cancer
18	White	Male	C49.2-Conn, subcutaneous, other soft tis: lower limb, hip	Undifferentiated; anaplastic; Grade IV	Positive histology	9260/3: Ewing sarcoma	T1NOS	N0	M0	None; diagnosed at autopsy	Surgery performed	No radiation and/or cancer-directed surgery	None/Unknown	Yes	25	300	0	0	Localized	Single (never married)	1055	2054	3081	6461	696	504	3893	29	Dead	Active follow-up	Dead (attributable to this cancer dx)	Alive or dead due to cancer
31	White	Female	C49.4-Conn, subcutaneous, other soft tis: abdomen	Unknown	Positive exfoliative cytology, no positive histology	9260/3: Ewing sarcoma	T2NOS	N0	M0	None; diagnosed at autopsy	Surgery performed	Radiation after surgery	Beam radiation	Yes	185	300	0	0	Localized	Single (never married)	669	1673	2481	5072	1027	666	3751	62	Alive	Active follow-up	Alive or dead of other cause	Alive or dead due to cancer
27	White	Male	C41.4-Pelvic bones, sacrum, coccyx and associated joints	Undifferentiated; anaplastic; Grade IV	Positive histology	9260/3: Ewing sarcoma	T2	N0	M0	None; diagnosed at autopsy	Not recommended	No radiation and/or cancer-directed surgery	Radiation, NOS method or source not specified	Yes	156	400	0	0	Regional	Single (never married)	1504	3153	1352	3940	1678	1200	2967	27	Dead	Active follow-up	Dead (attributable to this cancer dx)	Alive or dead due to cancer
13	White	Female	C41.3-Rib, sternum, clavicle and associated joints	Unknown	Positive histology	9260/3: Ewing sarcoma	T1	N0	M0	None; diagnosed at autopsy	Surgery performed	No radiation and/or cancer-directed surgery	None/Unknown	Yes	60	300	0	0	Localized	Single (never married)	794	1742	2952	5344	885	593	3883	58	Alive	Active follow-up	Alive or dead of other cause	Alive or dead due to cancer
16	White	Male	C40.2-Long bones of lower limb and associated joints	Unknown	Positive histology	9261/3: Adamantinoma of long bones	T2	N0	M0	None; diagnosed at autopsy	Surgery performed	No radiation and/or cancer-directed surgery	None/Unknown	No/Unknown	90	100	0	0	Localized	Single (never married)	669	1673	2481	5072	1027	666	3751	59	Alive	Active follow-up	Alive or dead of other cause	Alive or dead due to cancer
7	White	Female	C40.2-Long bones of lower limb and associated joints	Unknown	Positive histology	9260/3: Ewing sarcoma	TX	N0	M0	None; diagnosed at autopsy	Surgery performed	No radiation and/or cancer-directed surgery	None/Unknown	Yes	999	300	0	0	Localized	Single (never married)	1040	2579	1592	4657	1257	831	2994	107	Alive	Active follow-up	Alive or dead of other cause	Alive or dead due to cancer
19	White	Male	C49.1-Conn, subcutaneous, other soft tis: upr limb, shoulder	Unknown	Positive histology	9260/3: Ewing sarcoma	T2a	N0	M0	None; diagnosed at autopsy	Surgery performed	Radiation prior to surgery	Beam radiation	Yes	80	110	0	0	Localized	Single (never married)	1040	2579	1592	4657	1257	831	2994	55	Alive	Active follow-up	Alive or dead of other cause	Alive or dead due to cancer
21	White	Male	C41.4-Pelvic bones, sacrum, coccyx and associated joints	Unknown	Positive histology	9260/3: Ewing sarcoma	T3	N0	M1NOS	None; diagnosed at autopsy	Not recommended	No radiation and/or cancer-directed surgery	Beam radiation	Yes	70	820	0	60	Distant	Single (never married)	1058	2505	1663	4841	1068	753	2960	57	Alive	Active follow-up	Alive or dead of other cause	Alive or dead due to cancer
6	White	Male	C40.2-Long bones of lower limb and associated joints	Unknown	Positive histology	9260/3: Ewing sarcoma	T1	N0	M0	None; diagnosed at autopsy	Surgery performed	No radiation and/or cancer-directed surgery	None/Unknown	Yes	13	300	0	0	Localized	Single (never married)	312	955	3028	6586	394	402	4118	59	Alive	Active follow-up	Alive or dead of other cause	Alive or dead due to cancer
55	White	Female	C40.3-Short bones of lower limb and associated joints	Unknown	Positive histology	9260/3: Ewing sarcoma	T1	N0	M0	None; diagnosed at autopsy	Not recommended	No radiation and/or cancer-directed surgery	Beam radiation	Yes	62	300	0	0	Localized	Married (including common law)	1040	2579	1592	4657	1257	831	2994	20	Dead	Active follow-up	Dead (attributable to this cancer dx)	Alive or dead due to cancer
21	White	Female	C40.2-Long bones of lower limb and associated joints	Unknown	Positive histology	9260/3: Ewing sarcoma	TX	N0	M0	None; diagnosed at autopsy	Surgery performed	No radiation and/or cancer-directed surgery	None/Unknown	Yes	999	999	0	0	Unstaged	Single (never married)	669	1673	2481	5072	1027	666	3751	54	Dead	Active follow-up	Dead (attributable to this cancer dx)	Alive or dead due to cancer
38	White	Male	C40.2-Long bones of lower limb and associated joints	Undifferentiated; anaplastic; Grade IV	Positive histology	9260/3: Ewing sarcoma	T1	N0	M0	None; diagnosed at autopsy	Surgery performed	No radiation and/or cancer-directed surgery	None/Unknown	Yes	50	100	0	0	Localized	Married (including common law)	1272	2702	1529	4433	1208	1176	2994	53	Alive	Active follow-up	Alive or dead of other cause	Alive or dead due to cancer
38	White	Female	C41.0-Bones of skull and face and associated joints	Poorly differentiated; Grade III	Positive histology	9260/3: Ewing sarcoma	T1	N0	M0	None; diagnosed at autopsy	Not recommended	No radiation and/or cancer-directed surgery	Beam radiation	Yes	40	600	0	0	Regional	Married (including common law)	794	1742	2952	5344	885	593	3883	59	Alive	Active follow-up	Alive or dead of other cause	Alive or dead due to cancer
40	White	Female	C49.2-Conn, subcutaneous, other soft tis: lower limb, hip	Undifferentiated; anaplastic; Grade IV	Positive histology	9260/3: Ewing sarcoma	T2NOS	N0	M1	Any combo of sur proc to oth rg, dis lym nd, and/or dis site	Surgery performed	No radiation and/or cancer-directed surgery	None/Unknown	Yes	55	100	0	40	Distant	Married (including common law)	1055	2054	3081	6461	696	504	3893	50	Alive	Active follow-up	Alive or dead of other cause	Alive or dead due to cancer
11	White	Male	C49.3-Conn, subcutaneous, other soft tis: thorax	Unknown	Positive histology	9260/3: Ewing sarcoma	T1NOS	N0	M0	None; diagnosed at autopsy	Surgery performed	Radiation after surgery	Beam radiation	Yes	50	100	0	0	Localized	Single (never married)	1055	2054	3081	6461	696	504	3893	51	Alive	Active follow-up	Alive or dead of other cause	Alive or dead due to cancer
45	White	Female	C48.0-Retroperitoneum	Poorly differentiated; Grade III	Positive histology	9260/3: Ewing sarcoma	T2b	N0	M0	None; diagnosed at autopsy	Surgery performed	No radiation and/or cancer-directed surgery	None/Unknown	No/Unknown	63	600	0	0	Regional	Divorced	794	1742	2952	5344	885	593	3883	27	Dead	Active follow-up	Dead (attributable to this cancer dx)	Alive or dead due to cancer
27	White	Female	C41.9-Bone, NOS	Unknown	Positive histology	9260/3: Ewing sarcoma	TX	N0	M1NOS	None; diagnosed at autopsy	Surgery performed	No radiation and/or cancer-directed surgery	None/Unknown	Yes	999	999	0	60	Distant	Unknown	1058	2505	1663	4841	1068	753	2960	50	Alive	Active follow-up	Alive or dead of other cause	Alive or dead due to cancer
7	White	Female	C40.2-Long bones of lower limb and associated joints	Undifferentiated; anaplastic; Grade IV	Positive histology	9260/3: Ewing sarcoma	T2	N0	M1b	None; diagnosed at autopsy	Surgery performed	Radiation after surgery	Beam radiation	Yes	85	400	0	40	Distant	Single (never married)	1055	2054	3081	6461	696	504	3893	37	Dead	Active follow-up	Dead (attributable to this cancer dx)	Alive or dead due to cancer
3	White	Male	C49.6-Conn, subcutaneous, other soft tis: trunk, NOS	Undifferentiated; anaplastic; Grade IV	Positive histology	9260/3: Ewing sarcoma	T2b	N0	M1	None; diagnosed at autopsy	Surgery performed	Radiation after surgery	Beam radiation	Yes	60	620	0	40	Distant	Single (never married)	1836	3461	1200	3923	1586	1324	2642	53	Alive	Active follow-up	Alive or dead of other cause	Alive or dead due to cancer
19	White	Male	C72.0-Spinal cord	Unknown	Positive histology	9260/3: Ewing sarcoma	NA	NA	NA	None; diagnosed at autopsy	Surgery performed	Radiation after surgery	Beam radiation	Yes	999	300	988	0	Unstaged	Single (never married)	1055	2054	3081	6461	696	504	3893	48	Alive	Active follow-up	Alive or dead of other cause	Alive or dead due to cancer
25	Other (American Indian/AK Native, Asian/Pacific Islander)	Female	C49.2-Conn, subcutaneous, other soft tis: lower limb, hip	Unknown	Positive histology	9260/3: Ewing sarcoma	T2NOS	NX	MX	None; diagnosed at autopsy	Surgery performed	No radiation and/or cancer-directed surgery	None/Unknown	Yes	130	300	999	99	Localized	Married (including common law)	794	1742	2952	5344	885	593	3883	48	Alive	Active follow-up	Alive or dead of other cause	Alive or dead due to cancer
16	White	Female	C49.1-Conn, subcutaneous, other soft tis: upr limb, shoulder	Unknown	Positive histology	9260/3: Ewing sarcoma	T2b	NX	M1	None; diagnosed at autopsy	Not recommended	No radiation and/or cancer-directed surgery	Beam radiation	Yes	100	420	999	40	Distant	Single (never married)	1058	2505	1663	4841	1068	753	2960	20	Dead	Active follow-up	Dead (attributable to this cancer dx)	Alive or dead due to cancer
18	White	Male	C49.5-Conn, subcutaneous, other soft tis: pelvis	Undifferentiated; anaplastic; Grade IV	Positive histology	9260/3: Ewing sarcoma	T2b	N0	M1	None; diagnosed at autopsy	Surgery performed	Radiation after surgery	Beam radiation	Yes	200	620	0	40	Distant	Single (never married)	1055	2054	3081	6461	696	504	3893	25	Dead	Active follow-up	Dead (attributable to this cancer dx)	Alive or dead due to cancer
7	White	Female	C40.2-Long bones of lower limb and associated joints	Unknown	Positive histology	9260/3: Ewing sarcoma	T2	N0	M0	None; diagnosed at autopsy	Surgery performed	No radiation and/or cancer-directed surgery	None/Unknown	Yes	110	100	0	0	Localized	Single (never married)	1040	1990	2695	6529	635	520	3798	56	Alive	Active follow-up	Alive or dead of other cause	Alive or dead due to cancer
19	White	Female	C56.9-Ovary	Undifferentiated; anaplastic; Grade IV	Positive histology	9260/3: Ewing sarcoma	NA	NA	NA	None; diagnosed at autopsy	Surgery performed	No radiation and/or cancer-directed surgery	None/Unknown	Yes	200	780	0	40	Distant	Single (never married)	794	1742	2952	5344	885	593	3883	47	Alive	Active follow-up	Alive or dead of other cause	Alive or dead due to cancer
10	White	Male	C41.4-Pelvic bones, sacrum, coccyx and associated joints	Unknown	Positive histology	9260/3: Ewing sarcoma	T2	N0	M0	None; diagnosed at autopsy	Surgery performed	No radiation and/or cancer-directed surgery	None/Unknown	Yes	150	100	0	0	Localized	Single (never married)	175	968	2610	5270	553	475	3582	48	Alive	Active follow-up	Alive or dead of other cause	Alive or dead due to cancer
15	White	Female	C49.3-Conn, subcutaneous, other soft tis: thorax	Unknown	Positive histology	9260/3: Ewing sarcoma	T1b	N0	M0	None; diagnosed at autopsy	Surgery performed	No radiation and/or cancer-directed surgery	None/Unknown	Yes	25	320	0	0	Localized	Single (never married)	2302	3832	1150	3630	1881	1275	2724	56	Alive	Active follow-up	Alive or dead of other cause	Alive or dead due to cancer
18	White	Female	C41.3-Rib, sternum, clavicle and associated joints	Undifferentiated; anaplastic; Grade IV	Positive histology	9260/3: Ewing sarcoma	T1	N0	M0	None; diagnosed at autopsy	Surgery performed	No radiation and/or cancer-directed surgery	None/Unknown	Yes	60	100	0	0	Localized	Single (never married)	1055	2054	3081	6461	696	504	3893	46	Alive	Active follow-up	Alive or dead of other cause	Alive or dead due to cancer
18	White	Female	C41.2-Vertebral column	Unknown	Positive histology	9260/3: Ewing sarcoma	TX	N0	M1b	None; diagnosed at autopsy	Not recommended	No radiation and/or cancer-directed surgery	Beam radiation	Yes	60	999	0	40	Distant	Single (never married)	2158	3619	1105	3801	1692	1309	2683	21	Dead	Active follow-up	Dead (attributable to this cancer dx)	Alive or dead due to cancer
24	Other (American Indian/AK Native, Asian/Pacific Islander)	Female	C41.4-Pelvic bones, sacrum, coccyx and associated joints	Unknown	Positive histology	9260/3: Ewing sarcoma	T1	N0	M0	None; diagnosed at autopsy	Not recommended	No radiation and/or cancer-directed surgery	Beam radiation	Yes	57	600	0	0	Regional	Single (never married)	589	1774	2184	4101	1218	934	3288	49	Alive	Active follow-up	Alive or dead of other cause	Alive or dead due to cancer
10	White	Male	C41.2-Vertebral column	Undifferentiated; anaplastic; Grade IV	Positive histology	9260/3: Ewing sarcoma	TX	N0	M1b	None; diagnosed at autopsy	Not recommended	No radiation and/or cancer-directed surgery	Beam radiation	Yes	999	400	0	40	Distant	Single (never married)	1055	2054	3081	6461	696	504	3893	44	Alive	Active follow-up	Alive or dead of other cause	Alive or dead due to cancer
33	White	Male	C40.2-Long bones of lower limb and associated joints	Unknown	Positive histology	9260/3: Ewing sarcoma	T1	N0	M1b	None; diagnosed at autopsy	Not recommended	No radiation and/or cancer-directed surgery	Beam radiation	Yes	62	400	0	40	Distant	Married (including common law)	1058	2505	1663	4841	1068	753	2960	11	Dead	Active follow-up	Dead (attributable to this cancer dx)	Alive or dead due to cancer
17	White	Male	C41.4-Pelvic bones, sacrum, coccyx and associated joints	Unknown	Positive histology	9260/3: Ewing sarcoma	T2	N0	M1a	None; diagnosed at autopsy	Surgery performed	No radiation and/or cancer-directed surgery	None/Unknown	Yes	180	400	0	30	Distant	Single (never married)	1058	2505	1663	4841	1068	753	2960	44	Alive	Active follow-up	Alive or dead of other cause	Alive or dead due to cancer
18	White	Male	C40.2-Long bones of lower limb and associated joints	Unknown	Positive histology	9260/3: Ewing sarcoma	T2	N0	M0	None; diagnosed at autopsy	Surgery performed	No radiation and/or cancer-directed surgery	None/Unknown	Yes	99	400	0	0	Regional	Single (never married)	1331	2877	1453	4692	1351	1035	2855	48	Alive	Active follow-up	Alive or dead of other cause	Alive or dead due to cancer
41	White	Male	C15.4-Middle third of esophagus	Poorly differentiated; Grade III	Positive histology	9260/3: Ewing sarcoma	NA	NA	NA	None; diagnosed at autopsy	Not recommended	No radiation and/or cancer-directed surgery	None/Unknown	Yes	999	999	999	99	Unstaged	Single (never married)	1040	1990	2695	6529	635	520	3798	3	Dead	Active follow-up	Dead (attributable to this cancer dx)	Alive or dead due to cancer
4	White	Male	C41.2-Vertebral column	Unknown	Positive histology	9260/3: Ewing sarcoma	TX	N0	M0	None; diagnosed at autopsy	Surgery performed	Radiation after surgery	Beam radiation	Yes	999	100	0	0	Localized	Single (never married)	1366	2964	1405	4470	1229	1165	2770	47	Alive	Active follow-up	Alive or dead of other cause	Alive or dead due to cancer
18	Other (American Indian/AK Native, Asian/Pacific Islander)	Male	C40.2-Long bones of lower limb and associated joints	Unknown	Positive histology	9260/3: Ewing sarcoma	T2	N0	M0	None; diagnosed at autopsy	Surgery performed	No radiation and/or cancer-directed surgery	None/Unknown	Yes	155	100	0	0	Localized	Single (never married)	1833	3248	1755	3846	1760	1181	3082	47	Alive	Active follow-up	Alive or dead of other cause	Alive or dead due to cancer
21	White	Male	C40.0-Long bones: upper limb, scapula, and associated joints	Unknown	Positive histology	9260/3: Ewing sarcoma	T1	N0	M0	None; diagnosed at autopsy	Surgery performed	Radiation prior to surgery	Beam radiation	Yes	66	100	0	0	Localized	Single (never married)	1504	3153	1352	3940	1678	1200	2967	48	Alive	Active follow-up	Alive or dead of other cause	Alive or dead due to cancer
27	White	Female	C49.2-Conn, subcutaneous, other soft tis: lower limb, hip	Unknown	Positive histology	9260/3: Ewing sarcoma	TX	N0	M0	None; diagnosed at autopsy	Surgery performed	No radiation and/or cancer-directed surgery	None/Unknown	Yes	999	100	0	0	Localized	Married (including common law)	669	1673	2481	5072	1027	666	3751	12	Dead	Active follow-up	Dead (attributable to this cancer dx)	Alive or dead due to cancer
22	White	Male	C41.4-Pelvic bones, sacrum, coccyx and associated joints	Unknown	Positive histology	9260/3: Ewing sarcoma	T2	N0	M1NOS	None; diagnosed at autopsy	Not recommended	No radiation and/or cancer-directed surgery	Radiation, NOS method or source not specified	Yes	130	800	0	60	Distant	Unknown	423	2035	1070	4340	1107	942	4347	8	Dead	Active follow-up	Dead (attributable to this cancer dx)	Alive or dead due to cancer
23	White	Female	C49.2-Conn, subcutaneous, other soft tis: lower limb, hip	Unknown	Positive histology	9260/3: Ewing sarcoma	T2b	N0	M0	None; diagnosed at autopsy	Surgery performed	Radiation prior to surgery	Beam radiation	Yes	232	120	0	0	Localized	Single (never married)	1040	1990	2695	6529	635	520	3798	47	Alive	Active follow-up	Alive or dead of other cause	Alive or dead due to cancer
39	White	Male	C61.9-Prostate gland	Unknown	Positive histology	9260/3: Ewing sarcoma	NA	NA	NA	None; diagnosed at autopsy	Not recommended	No radiation and/or cancer-directed surgery	Beam radiation	Yes	995	445	100	60	Distant	Married (including common law)	794	1742	2952	5344	885	593	3883	24	Dead	Active follow-up	Dead (attributable to this cancer dx)	Alive or dead due to cancer
8	White	Female	C49.3-Conn, subcutaneous, other soft tis: thorax	Unknown	Positive histology	9260/3: Ewing sarcoma	T2b	NX	M1	None; diagnosed at autopsy	Surgery performed	No radiation and/or cancer-directed surgery	None/Unknown	Yes	60	620	999	40	Distant	Single (never married)	1058	2505	1663	4841	1068	753	2960	11	Dead	Active follow-up	Dead (attributable to this cancer dx)	Alive or dead due to cancer
72	White	Male	C40.2-Long bones of lower limb and associated joints	Poorly differentiated; Grade III	Positive histology	9260/3: Ewing sarcoma	T2	N0	M0	None; diagnosed at autopsy	Surgery performed	Radiation after surgery	Beam radiation	No/Unknown	83	400	0	0	Regional	Single (never married)	1237	2818	1033	3410	1634	1134	2358	5	Dead	Active follow-up	Dead (attributable to this cancer dx)	Alive or dead due to cancer
21	White	Male	C49.3-Conn, subcutaneous, other soft tis: thorax	Unknown	Positive histology	9260/3: Ewing sarcoma	T2b	N1	M1	Non-primary surgical procedure to other regional sites	Surgery performed	Radiation after surgery	Beam radiation	Yes	140	620	100	60	Distant	Single (never married)	1040	2579	1592	4657	1257	831	2994	19	Dead	Active follow-up	Dead (attributable to this cancer dx)	Alive or dead due to cancer
32	White	Male	C40.0-Long bones: upper limb, scapula, and associated joints	Unknown	Positive histology	9260/3: Ewing sarcoma	T2	N0	M0	None; diagnosed at autopsy	Not recommended	No radiation and/or cancer-directed surgery	Beam radiation	Yes	96	300	0	0	Localized	Married (including common law)	1055	2054	3081	6461	696	504	3893	12	Dead	Active follow-up	Dead (attributable to this cancer dx)	Alive or dead due to cancer
8	White	Male	C41.3-Rib, sternum, clavicle and associated joints	Unknown	Positive histology	9260/3: Ewing sarcoma	T2	NX	M1a	None; diagnosed at autopsy	Surgery performed	No radiation and/or cancer-directed surgery	None/Unknown	Yes	120	800	999	30	Distant	Single (never married)	1058	2505	1663	4841	1068	753	2960	28	Dead	Active follow-up	Dead (attributable to this cancer dx)	Alive or dead due to cancer
22	White	Male	C74.9-Adrenal gland, NOS	Unknown	Positive histology	9260/3: Ewing sarcoma	NA	NA	NA	None; diagnosed at autopsy	Surgery performed	No radiation and/or cancer-directed surgery	None/Unknown	No/Unknown	190	800	999	0	Blank(s)	Single (never married)	1504	3153	1352	3940	1678	1200	2967	3	Dead	Active follow-up	Dead (attributable to this cancer dx)	Alive or dead due to cancer
4	White	Female	C41.3-Rib, sternum, clavicle and associated joints	Unknown	Positive histology	9260/3: Ewing sarcoma	T2	N0	M1a	None; diagnosed at autopsy	Not recommended	No radiation and/or cancer-directed surgery	None/Unknown	Yes	86	800	0	30	Distant	Single (never married)	794	1742	2952	5344	885	593	3883	40	Alive	Active follow-up	Alive or dead of other cause	Alive or dead due to cancer
43	White	Female	C49.2-Conn, subcutaneous, other soft tis: lower limb, hip	Poorly differentiated; Grade III	Positive histology	9260/3: Ewing sarcoma	T1a	N0	M0	None; diagnosed at autopsy	Surgery performed	No radiation and/or cancer-directed surgery	None/Unknown	No/Unknown	20	110	0	0	Localized	Married (including common law)	1040	1990	2695	6529	635	520	3798	44	Alive	Active follow-up	Alive or dead of other cause	Alive or dead due to cancer
31	White	Female	C49.6-Conn, subcutaneous, other soft tis: trunk, NOS	Unknown	Positive histology	9260/3: Ewing sarcoma	T2b	N0	M1	None; diagnosed at autopsy	Not recommended	No radiation and/or cancer-directed surgery	Beam radiation	Yes	135	620	0	60	Distant	Married (including common law)	403	1509	2301	3937	1291	859	3277	6	Dead	Active follow-up	Dead (attributable to this cancer dx)	Alive or dead due to cancer
28	Unknown	Male	C40.2-Long bones of lower limb and associated joints	Unknown	Positive histology	9260/3: Ewing sarcoma	TX	NX	MX	None; diagnosed at autopsy	Recommended but not performed, unknown reason	No radiation and/or cancer-directed surgery	None/Unknown	No/Unknown	999	999	999	99	Unstaged	Unknown	1090	2076	2942	5404	849	671	3636	0	Alive	Active follow-up	Alive or dead of other cause	Alive or dead due to cancer
6	White	Female	C49.2-Conn, subcutaneous, other soft tis: lower limb, hip	Unknown	Positive histology	9260/3: Ewing sarcoma	T2b	NX	M1	None; diagnosed at autopsy	Surgery performed	No radiation and/or cancer-directed surgery	None/Unknown	Yes	60	420	999	40	Distant	Single (never married)	1040	2579	1592	4657	1257	831	2994	42	Alive	Active follow-up	Alive or dead of other cause	Alive or dead due to cancer
17	White	Male	C41.4-Pelvic bones, sacrum, coccyx and associated joints	Unknown	Positive histology	9260/3: Ewing sarcoma	T2	N0	M1a	None; diagnosed at autopsy	Surgery performed	Radiation after surgery	Beam radiation	Yes	103	600	0	30	Distant	Single (never married)	1504	3153	1352	3940	1678	1200	2967	29	Dead	Active follow-up	Dead (attributable to this cancer dx)	Alive or dead due to cancer
20	White	Male	C40.2-Long bones of lower limb and associated joints	Undifferentiated; anaplastic; Grade IV	Positive histology	9260/3: Ewing sarcoma	T2	N0	M1a	None; diagnosed at autopsy	Surgery performed	No radiation and/or cancer-directed surgery	None/Unknown	Yes	100	400	0	30	Distant	Single (never married)	794	1742	2952	5344	885	593	3883	34	Dead	Active follow-up	Alive or dead of other cause	Dead (attributable to causes other than this cancer dx)
17	White	Male	C41.2-Vertebral column	Poorly differentiated; Grade III	Positive histology	9260/3: Ewing sarcoma	T1	N0	M0	None; diagnosed at autopsy	Surgery performed	No radiation and/or cancer-directed surgery	None/Unknown	Yes	79	600	0	0	Regional	Single (never married)	312	955	3028	6586	394	402	4118	28	Dead	Active follow-up	Dead (attributable to this cancer dx)	Alive or dead due to cancer
4	White	Male	C49.2-Conn, subcutaneous, other soft tis: lower limb, hip	Unknown	Positive histology	9260/3: Ewing sarcoma	T2NOS	N0	M1	None; diagnosed at autopsy	Surgery performed	Radiation after surgery	Beam radiation	Yes	60	100	0	40	Distant	Single (never married)	1331	2877	1453	4692	1351	1035	2855	37	Alive	Active follow-up	Alive or dead of other cause	Alive or dead due to cancer
28	White	Male	C41.4-Pelvic bones, sacrum, coccyx and associated joints	Unknown	Positive histology	9260/3: Ewing sarcoma	T2	N0	M1a	Any combo of sur proc to oth rg, dis lym nd, and/or dis site	Not recommended	Radiation after surgery	Beam radiation	Yes	120	400	0	30	Distant	Single (never married)	1366	2964	1405	4470	1229	1165	2770	22	Dead	Active follow-up	Dead (attributable to this cancer dx)	Alive or dead due to cancer
27	White	Female	C64.9-Kidney, NOS	Unknown	Positive histology	9260/3: Ewing sarcoma	NA	NA	NA	None; diagnosed at autopsy	Surgery performed	Radiation after surgery	Beam radiation	Yes	120	460	0	0	Regional	Single (never married)	1040	2579	1592	4657	1257	831	2994	11	Dead	Active follow-up	Dead (attributable to this cancer dx)	Alive or dead due to cancer
18	White	Female	C49.2-Conn, subcutaneous, other soft tis: lower limb, hip	Unknown	Positive histology	9260/3: Ewing sarcoma	T2b	N0	M0	None; diagnosed at autopsy	Surgery performed	Radiation after surgery	Beam radiation	Yes	70	620	0	0	Regional	Single (never married)	669	1673	2481	5072	1027	666	3751	32	Dead	Active follow-up	Dead (attributable to this cancer dx)	Alive or dead due to cancer
13	White	Male	C40.2-Long bones of lower limb and associated joints	Undifferentiated; anaplastic; Grade IV	Positive histology	9260/3: Ewing sarcoma	T2	N1	M0	None; diagnosed at autopsy	Surgery performed	Radiation after surgery	Beam radiation	Yes	150	350	100	0	Regional	Single (never married)	1058	2505	1663	4841	1068	753	2960	37	Alive	Active follow-up	Alive or dead of other cause	Alive or dead due to cancer
11	Other (American Indian/AK Native, Asian/Pacific Islander)	Male	C41.4-Pelvic bones, sacrum, coccyx and associated joints	Unknown	Positive histology	9260/3: Ewing sarcoma	T1	N0	M1NOS	None; diagnosed at autopsy	Not recommended	No radiation and/or cancer-directed surgery	Beam radiation	Yes	65	400	0	60	Distant	Single (never married)	669	1673	2481	5072	1027	666	3751	15	Dead	Active follow-up	Dead (attributable to this cancer dx)	Alive or dead due to cancer
20	White	Male	C41.4-Pelvic bones, sacrum, coccyx and associated joints	Undifferentiated; anaplastic; Grade IV	Positive histology	9260/3: Ewing sarcoma	T2	N0	M1b	None; diagnosed at autopsy	Not recommended	No radiation and/or cancer-directed surgery	Beam radiation	Yes	89	400	0	40	Distant	Single (never married)	794	1742	2952	5344	885	593	3883	40	Alive	Active follow-up	Alive or dead of other cause	Alive or dead due to cancer
3	White	Female	C40.2-Long bones of lower limb and associated joints	Unknown	Positive histology	9260/3: Ewing sarcoma	TX	N0	M0	None; diagnosed at autopsy	Not recommended	No radiation and/or cancer-directed surgery	Beam radiation	Yes	999	300	0	0	Localized	Single (never married)	175	968	2610	5270	553	475	3582	37	Alive	Active follow-up	Alive or dead of other cause	Alive or dead due to cancer
13	White	Male	C40.2-Long bones of lower limb and associated joints	Unknown	Positive histology	9260/3: Ewing sarcoma	T2	N0	M1a	None; diagnosed at autopsy	Not recommended	No radiation and/or cancer-directed surgery	None/Unknown	Yes	84	400	0	30	Distant	Single (never married)	794	1742	2952	5344	885	593	3883	35	Alive	Active follow-up	Alive or dead of other cause	Alive or dead due to cancer
15	White	Male	C41.2-Vertebral column	Unknown	Positive histology	9260/3: Ewing sarcoma	TX	N0	M1a	None; diagnosed at autopsy	Not recommended	No radiation and/or cancer-directed surgery	Beam radiation	Yes	999	400	0	30	Distant	Single (never married)	418	1674	1660	4049	1135	874	3190	34	Alive	Active follow-up	Alive or dead of other cause	Alive or dead due to cancer
13	White	Male	C41.3-Rib, sternum, clavicle and associated joints	Poorly differentiated; Grade III	Positive histology	9260/3: Ewing sarcoma	T1	N0	M1a	None; diagnosed at autopsy	Surgery performed	Radiation after surgery	Beam radiation	No/Unknown	80	600	0	30	Distant	Single (never married)	669	1673	2481	5072	1027	666	3751	36	Alive	Active follow-up	Alive or dead of other cause	Alive or dead due to cancer
18	White	Male	C49.3-Conn, subcutaneous, other soft tis: thorax	Unknown	Positive histology	9260/3: Ewing sarcoma	T2b	N0	M0	None; diagnosed at autopsy	Not recommended	No radiation and/or cancer-directed surgery	None/Unknown	Yes	95	620	0	0	Regional	Single (never married)	794	1742	2952	5344	885	593	3883	20	Dead	Active follow-up	Dead (attributable to this cancer dx)	Alive or dead due to cancer
11	White	Male	C41.2-Vertebral column	Unknown	Positive histology	9260/3: Ewing sarcoma	TX	N0	M1b	None; diagnosed at autopsy	Not recommended	No radiation and/or cancer-directed surgery	None/Unknown	Yes	999	800	0	40	Distant	Single (never married)	669	1673	2481	5072	1027	666	3751	30	Dead	Active follow-up	Dead (attributable to this cancer dx)	Alive or dead due to cancer
28	White	Female	C64.9-Kidney, NOS	Unknown	Positive histology	9260/3: Ewing sarcoma	NA	NA	NA	None; diagnosed at autopsy	Surgery performed	No radiation and/or cancer-directed surgery	None/Unknown	Yes	100	100	0	0	Localized	Single (never married)	1833	3248	1755	3846	1760	1181	3082	35	Alive	Active follow-up	Alive or dead of other cause	Alive or dead due to cancer
15	White	Male	C41.4-Pelvic bones, sacrum, coccyx and associated joints	Undifferentiated; anaplastic; Grade IV	Positive histology	9260/3: Ewing sarcoma	T2	N0	M1b	None; diagnosed at autopsy	Surgery performed	No radiation and/or cancer-directed surgery	None/Unknown	Yes	140	400	0	40	Distant	Single (never married)	1055	2054	3081	6461	696	504	3893	34	Alive	Active follow-up	Alive or dead of other cause	Alive or dead due to cancer
20	White	Male	C41.4-Pelvic bones, sacrum, coccyx and associated joints	Unknown	Positive histology	9260/3: Ewing sarcoma	TX	N0	M0	None; diagnosed at autopsy	Recommended, unknown if performed	No radiation and/or cancer-directed surgery	None/Unknown	Yes	999	600	0	0	Regional	Single (never married)	1055	2054	3081	6461	696	504	3893	33	Alive	Active follow-up	Alive or dead of other cause	Alive or dead due to cancer
33	White	Female	C49.3-Conn, subcutaneous, other soft tis: thorax	Unknown	Positive histology	9260/3: Ewing sarcoma	T2b	N0	M1	None; diagnosed at autopsy	Not recommended	No radiation and/or cancer-directed surgery	None/Unknown	Yes	53	620	0	40	Distant	Single (never married)	670	1508	2854	6192	470	427	3627	11	Dead	Active follow-up	Dead (attributable to this cancer dx)	Alive or dead due to cancer
11	White	Female	C40.0-Long bones: upper limb, scapula, and associated joints	Undifferentiated; anaplastic; Grade IV	Positive histology	9260/3: Ewing sarcoma	T2	N1	M1a	None; diagnosed at autopsy	Surgery performed	No radiation and/or cancer-directed surgery	None/Unknown	Yes	86	350	100	30	Distant	Single (never married)	1055	2054	3081	6461	696	504	3893	34	Alive	Active follow-up	Alive or dead of other cause	Alive or dead due to cancer
2	White	Male	C49.5-Conn, subcutaneous, other soft tis: pelvis	Unknown	Positive histology	9260/3: Ewing sarcoma	T2b	N0	M0	None; diagnosed at autopsy	Surgery performed	No radiation and/or cancer-directed surgery	None/Unknown	Yes	78	600	0	0	Regional	Single (never married)	1833	3248	1755	3846	1760	1181	3082	36	Alive	Active follow-up	Alive or dead of other cause	Alive or dead due to cancer
18	White	Female	C40.0-Long bones: upper limb, scapula, and associated joints	Unknown	Positive histology	9260/3: Ewing sarcoma	T1	N0	M0	None; diagnosed at autopsy	Not recommended	No radiation and/or cancer-directed surgery	Beam radiation	Yes	70	300	0	0	Localized	Single (never married)	1005	2022	3414	5162	949	715	4229	35	Alive	Active follow-up	Alive or dead of other cause	Alive or dead due to cancer
29	Black	Female	C41.4-Pelvic bones, sacrum, coccyx and associated joints	Unknown	Positive histology	9260/3: Ewing sarcoma	T2	N0	M1b	None; diagnosed at autopsy	Not recommended	No radiation and/or cancer-directed surgery	Beam radiation	Yes	104	300	0	40	Distant	Single (never married)	669	1673	2481	5072	1027	666	3751	12	Dead	Active follow-up	Dead (attributable to this cancer dx)	Alive or dead due to cancer
20	White	Male	C49.3-Conn, subcutaneous, other soft tis: thorax	Unknown	Positive histology	9260/3: Ewing sarcoma	T2b	N0	M1	None; diagnosed at autopsy	Not recommended	No radiation and/or cancer-directed surgery	Radiation, NOS method or source not specified	Yes	230	800	0	40	Distant	Single (never married)	1058	2505	1663	4841	1068	753	2960	9	Dead	Active follow-up	Dead (attributable to this cancer dx)	Alive or dead due to cancer
15	White	Male	C40.0-Long bones: upper limb, scapula, and associated joints	Unknown	Positive histology	9260/3: Ewing sarcoma	T2	N1	M0	None; diagnosed at autopsy	Not recommended	No radiation and/or cancer-directed surgery	Beam radiation	Yes	997	350	100	0	Regional	Single (never married)	1366	2964	1405	4470	1229	1165	2770	34	Alive	Active follow-up	Alive or dead of other cause	Alive or dead due to cancer
32	White	Female	C41.0-Bones of skull and face and associated joints	Unknown	Positive histology	9260/3: Ewing sarcoma	T1	N1	M1b	None; diagnosed at autopsy	Surgery performed	Radiation after surgery	Beam radiation	Yes	60	600	100	40	Distant	Married (including common law)	669	1673	2481	5072	1027	666	3751	5	Dead	Active follow-up	Dead (attributable to this cancer dx)	Alive or dead due to cancer
46	White	Female	C49.6-Conn, subcutaneous, other soft tis: trunk, NOS	Unknown	Positive histology	9260/3: Ewing sarcoma	TX	N0	M0	None; diagnosed at autopsy	Surgery performed	Radiation after surgery	Beam radiation	Yes	122	999	0	0	Unstaged	Married (including common law)	1040	2579	1592	4657	1257	831	2994	39	Alive	Active follow-up	Alive or dead of other cause	Alive or dead due to cancer
15	White	Male	C41.4-Pelvic bones, sacrum, coccyx and associated joints	Unknown	Positive histology	9260/3: Ewing sarcoma	T3	NX	M1b	None; diagnosed at autopsy	Not recommended	No radiation and/or cancer-directed surgery	Beam radiation	Yes	999	820	999	40	Distant	Single (never married)	1058	2505	1663	4841	1068	753	2960	19	Dead	Active follow-up	Dead (attributable to this cancer dx)	Alive or dead due to cancer
19	White	Female	C49.1-Conn, subcutaneous, other soft tis: upr limb, shoulder	Unknown	Positive histology	9260/3: Ewing sarcoma	T1b	N0	M0	None; diagnosed at autopsy	Surgery performed	Radiation before and after surgery	Beam radiation	Yes	30	120	0	0	Localized	Single (never married)	1055	2054	3081	6461	696	504	3893	24	Alive	Active follow-up	Alive or dead of other cause	Alive or dead due to cancer
15	White	Male	C40.0-Long bones: upper limb, scapula, and associated joints	Unknown	Positive histology	9260/3: Ewing sarcoma	T2	N0	M1NOS	None; diagnosed at autopsy	Not recommended	No radiation and/or cancer-directed surgery	Beam radiation	Yes	87	300	0	60	Distant	Single (never married)	669	1673	2481	5072	1027	666	3751	34	Alive	Active follow-up	Alive or dead of other cause	Alive or dead due to cancer
41	White	Male	C41.3-Rib, sternum, clavicle and associated joints	Unknown	Positive histology	9260/3: Ewing sarcoma	T1	N0	M0	None; diagnosed at autopsy	Surgery performed	Radiation after surgery	Beam radiation	Yes	62	310	0	0	Localized	Divorced	1058	2505	1663	4841	1068	753	2960	31	Alive	Active follow-up	Alive or dead of other cause	Alive or dead due to cancer
9	White	Male	C41.3-Rib, sternum, clavicle and associated joints	Unknown	Positive histology	9260/3: Ewing sarcoma	T1	N0	M0	None; diagnosed at autopsy	Surgery performed	No radiation and/or cancer-directed surgery	None/Unknown	Yes	79	300	0	0	Localized	Single (never married)	1833	3248	1755	3846	1760	1181	3082	5	Alive	Active follow-up	Alive or dead of other cause	Alive or dead due to cancer
49	Other (American Indian/AK Native, Asian/Pacific Islander)	Male	C41.4-Pelvic bones, sacrum, coccyx and associated joints	Undifferentiated; anaplastic; Grade IV	Positive histology	9260/3: Ewing sarcoma	T2	N0	M1b	None; diagnosed at autopsy	Not recommended	No radiation and/or cancer-directed surgery	Beam radiation	Yes	143	300	0	40	Distant	Married (including common law)	1055	2054	3081	6461	696	504	3893	2	Dead	Active follow-up	Dead (attributable to this cancer dx)	Alive or dead due to cancer
20	White	Male	C41.4-Pelvic bones, sacrum, coccyx and associated joints	Unknown	Positive histology	9260/3: Ewing sarcoma	T1	N0	M0	None; diagnosed at autopsy	Not recommended	No radiation and/or cancer-directed surgery	Beam radiation	Yes	55	400	0	0	Regional	Single (never married)	1331	2877	1453	4692	1351	1035	2855	31	Alive	Active follow-up	Alive or dead of other cause	Alive or dead due to cancer
[truncated: 487 more rows]
